# Supplementary material
Source: publisher figshare collection journal article supplement (https://acs.figshare.com/ndownloader/files/12746975)
Supplement: Supplementary file 1 [file 12746975]

# **Bench-Stable Nickel Precatalysts with Heck-type Activation**

Jessica M. Weber, Ashley R. Longstreet, and Timothy F. Jamison\*

*Massachusetts Institute of Technology, Department of Chemistry  
77 Massachusetts Avenue, Cambridge, MA 02139 USA*

\*Dr. A. R. Longstreet Present Address:  
*Department of Chemistry, Biochemistry & Physics, The University of Tampa  
401 W. Kennedy Blvd. Tampa, FL 33606 USA*

## **Table of Contents**

|       |                                                                        |         |
|-------|------------------------------------------------------------------------|---------|
| I.    | Materials, Methods, and General Considerations                         | pg. S2  |
| II.   | Synthesis and Characterization of the Aryl Precursors                  | pg. S3  |
| III.  | Characterization of the Carbonyl –Ene Reaction                         | pg. S7  |
| IV.   | Procedure and Characterization for<br>Authentic Heck Product Synthesis | pg. S10 |
| V.    | X-Ray Diffraction Characterization of the Precatalysts                 | pg. S12 |
| VI.   | GC/MS Spectra of Heck Activation Product                               | pg. S23 |
| VII.  | NMR Spectra of Aryl Precursors and Nickel Complexes                    | pg. S25 |
| VIII. | References                                                             | pg. S58 |

## I. Materials, Methods, and General Considerations

Reactions were carried out under N<sub>2</sub> using standard glovebox and Schlenk techniques at ambient temperature (23–27 °C) under Ar unless otherwise noted. Diethyl ether (Et<sub>2</sub>O), tetrahydrofuran (THF), dimethylformamide (DMF), and dichloromethane (DCM) were degassed by sparging with nitrogen and dried via passage through a column of activated alumina on a Glass Contour solvent purification system. Methanol (>99.8%) and pentane were used as received. Complexes (PPh<sub>3</sub>)<sub>2</sub>NiBr<sub>2</sub>, (PPh<sub>3</sub>)<sub>2</sub>NiCl<sub>2</sub>, and (PPh<sub>3</sub>)<sub>2</sub>Ni(*o*-tolyl)Cl were prepared according to previously published procedures.<sup>4</sup> Metal catalyst Bis(1,5-cyclooctadiene)nickel(0) (Ni(COD)<sub>2</sub>) was purchased from Strem Chemicals (Newburyport, MA) and stored at –30 °C in a glovebox freezer. Flash chromatography was performed on a Biotage Isolera with accelerated chromatographic isolation (ACI) system.

Purity was determined by <sup>31</sup>P, <sup>1</sup>H and <sup>13</sup>C NMR. NMR spectra were obtained in CD<sub>2</sub>Cl<sub>2</sub>, C<sub>6</sub>D<sub>6</sub>, or toluene-*d*<sub>8</sub> purchased from Cambridge Isotope Laboratories and used as received. Norell 5mm NMR tubes with standard septa caps were used. <sup>1</sup>H NMR Spectra were obtained at 400 MHz, <sup>13</sup>C spectra were obtained at 101 MHz with <sup>1</sup>H decoupling, and <sup>31</sup>P spectra were obtained at 126 MHz with <sup>1</sup>H decoupling. <sup>1</sup>H chemical shifts are reported in parts per million relative to TMS (δ = 0.00 ppm) and were referenced to the residual solvent peak. <sup>31</sup>P chemical shifts are reported in parts per million relative to 85% phosphoric acid (δ = 0.00 ppm). The following designations are used to describe multiplicities: s (singlet), brs (broad singlet), d (doublet), t (triplet), q (quartet), dd (doublet of doublets), dt (doublet of triplets), m (multiplet). For <sup>1</sup>H NMR yields, nitromethane (1 equiv) was used as an internal standard added post reaction, added after dilution with CDCl<sub>3</sub>. Unless otherwise noted, NMR spectra were collected at room temperature (23–27 °C).

Gas chromatography (GC) analyses were performed on an Agilent 7890A GC system with an autosampler and (5%-phenyl)-methylpolysiloxane column coupled to a flame ionization detector. Gas chromatography/ mass spectroscopy (GC/MS) analyses were performed on an Agilent 5975C with a triple-axis detector using an autosampler and (5%-phenyl)-methylpolysiloxane column coupled to a quadrupole MSD. Dodecane (1 equiv) was used as an internal standard for determination of yields. Authentic samples of compounds **9** and **10** were synthesized via a previously published method and used to make a calibration curve used to determine yield.<sup>1</sup>

Melting points were collected on eletrothermal apparatus using glass capillaries. The meting points were determined open to air on recrystallized material. Infrared spectroscopy (IR) spectra were collected using an Agilent Cary 630 FT-IR spectrometer equipped with an ATR accessory. Peaks from the fingerprint region were omitted from the report for clarity. Elemental analyses (EA) were obtained for the complexes that did not successfully crystallize. EA was performed at Atlantic Microlabs, Inc. High-Resolution Mass Spectroscopy (HRMS) was obtained on a Bruker Daltonics APEXIV 4.7 Tesla FT-ICR-MS outfitted with either an electrospray ionization (ESI) or an IonSense DART ion source. X-Ray diffraction was performed on a Bruker APEX.

## II. Synthesis and Characterization of the Aryl Precursors.

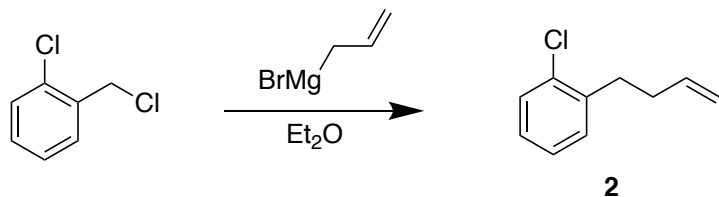

Procedure adapted from Bigi, M. A.; White, M. C. *J. Am. Chem. Soc.* **2013**, *135*, 7831-7834.

*1-(but-3-en-1-yl)-2-chloride (2)*: Under Ar, in an oven-dried round bottom flask charged with a stir bar, *o*-chlorobenzylchloride (3.38 g, 1 equiv, 21 mmol) was dissolved in dry Et<sub>2</sub>O (30 mL). The solution was cooled to 0 °C in an ice bath and 1M allylmagnesium bromide (1.2 equiv, 25.2 mmol) was added dropwise via syringe. The solution was warmed to room temperature and stirred for 20 h. The reaction was quenched with 10 mL of NH<sub>4</sub>Cl at 0 °C. After which, 5 mL of Et<sub>2</sub>O was added. The organic layer was collected and washed with 2 x 25 mL H<sub>2</sub>O. The organic layer was then dried with Na<sub>2</sub>SO<sub>4</sub>, filtered, and concentrated under vacuum. The product **2** (2.95 g, 84% yield) was purified via automated flash chromatography in 100% hexanes to give a yellow oil. R<sub>f</sub> = 0.65 in 100% hexanes

<sup>1</sup>H NMR (400 MHz, CDCl<sub>3</sub>, δ): 7.38 (d, *J* = 7.7 Hz, 1H), 7.12–7.24 (m, 3H), 5.86–5.98 (m, 1H), 5.01–5.15 (m, 2H), 2.87 (td, *J* = 7.6 Hz, 2H), 2.42 (q, *J* = 7.6 Hz, 2H).

<sup>13</sup>C NMR (101 MHz, CDCl<sub>3</sub>, δ): 139.5, 137.9, 134.1, 130.6, 129.6, 127.5, 126.8, 115.3, 33.8, 33.2.

HRMS-DART (*m/z*): Predicted: [M+H]<sup>+</sup>: 167.0622 *m/z* Found: [M+H]<sup>+</sup>: 167.0625 *m/z*.

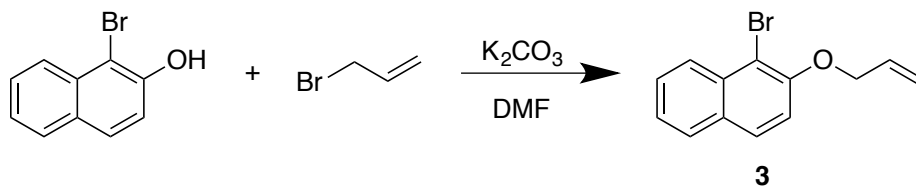

Procedure adapted from Amiratu, R.; Catarzi, F.; Menichetti, S.; Pedulli, G. F.; Viglianisi. *J. Am. Chem. Soc.* **2008**, *130*, 237–244.

*2-(allyloxy)-1-bromonaphthalene (3)*: Under Ar, in an oven-dried round bottom flask charged with a stir bar, DMF (25 mL) was added to 1-bromo-2-naphthol (5.58 g, 1 equiv, 25 mmol) and K<sub>2</sub>CO<sub>3</sub> (6.00 g, 4 equiv, 100 mmol). Allyl bromide (12.1 g, 8.65 mL, 4 equiv) was added via syringe and the reaction was stirred for 24 h at room temperature. Then H<sub>2</sub>O was added until the salt was dissolved and the desired product was extracted with 3 x 25 mL of DCM. The organic layer was dried over Na<sub>2</sub>SO<sub>4</sub>, filtered, and concentrated. The desired product **3** (4.82 g, 73% yield) was isolated as a white solid via automated flash chromatography followed by crystallization from hexanes. R<sub>f</sub> = 0.4 in

10% EtOAc/Hexanes.

$^1\text{H}$  NMR (400 MHz,  $\text{CDCl}_3$ ,  $\delta$ ): 8.24 (d,  $J = 8.9$  Hz, 1H), 7.78 (d,  $J = 8.9$  Hz, 2H), 7.57 (t,  $J = 7.3$  Hz, 1H), 7.41 (t,  $J = 7.3$  Hz, 1H), 7.24 (d,  $J = 8.9$  Hz, 1H), 6.07–6.19 (m, 1H), 5.53 (dq,  $J = 1.5$  Hz, 1H), 5.33 (dq,  $J = 1.5$  Hz, 1H), 4.76 (d,  $J = 5.0$  Hz, 2H).

$^{13}\text{C}$  NMR (101 MHz,  $\text{CDCl}_3$ ,  $\delta$ ): 153.0, 133.3, 133.0, 130.1, 128.9, 128.1, 127.8, 126.3, 124.6, 118.0, 115.4, 109.8, 70.7.

Consistent with previously reported characterization data.<sup>2</sup>

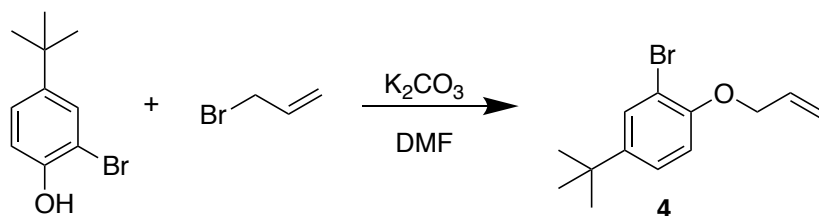

Procedure adapted from Amiratu, R.; Catarzi, F.; Menichetti, S.; Pedulli, G. F.; Viglianisi. *J. Am. Chem. Soc.* **2008**, *130*, 237–244.

*1-(allyloxy)-2-bromo-4-(tert-butyl)benzene (4)*: Under Ar, in an oven-dried round bottom flask charged with a stir bar, 2-bromo-4-(tert-butyl)phenol (20.62 g, 1 equiv, 90 mmol)<sup>3</sup> was added to a round bottom flask containing  $\text{K}_2\text{CO}_3$  (37.3 g, 3 equiv) and allyl bromide (21.78 g, 2 equiv). The reaction was stirred for 24 h at room temperature after which  $\text{H}_2\text{O}$  was added until the salt was dissolved. The desired product was extracted with 3 x 25 mL of DCM. The organic layer was then dried with  $\text{Na}_2\text{SO}_4$ , filtered, and concentrated. The desired product **4** (19.8 g, 82% yield over two steps) was isolated via automated flash chromatography to as a clear oil.  $R_f = 0.39$  in 10% EtOAc/Hexanes.

$^1\text{H}$  NMR (400 MHz,  $\text{CDCl}_3$ ,  $\delta$ ): 7.58 (s, 1H), 7.27 (d,  $J = 8.6$  Hz, 1H), 6.86 (d,  $J = 8.6$  Hz, 1H), 6.04–6.15 (m, 1H), 5.50 (d,  $J = 16.2$  Hz, 1H), 5.33 (d,  $J = 10.5$  Hz, 1H), 4.62 (d,  $J = 4.6$  Hz, 2H), 1.32 (s, 9H).

$^{13}\text{C}$  NMR (101 MHz,  $\text{CDCl}_3$ ,  $\delta$ ): 152.6, 145.0, 132.8, 130.4, 125.1, 117.4, 114.1, 113.2, 111.9, 69.6, 34.1, 31.4.

HRMS-DART( $m/z$ ): Predicted:  $[\text{M}+\text{H}]^+$ : 269.0536  $m/z$  Found:  $[\text{M}+\text{H}]^+$ : 269.0534  $m/z$ .



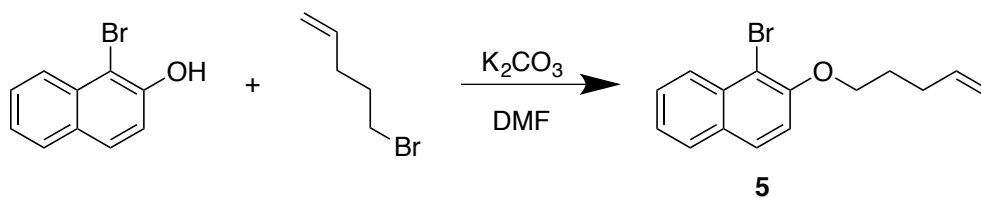

Procedure adapted from Amiratu, R.; Catarzi, F.; Menichetti, S.; Pedulli, G. F.; Viglianisi. *J. Am. Chem. Soc.* **2008**, *130*, 237–244.

*1-bromo-2-(pent-4-en-1-yloxy)naphthalene (5)*: Under Ar, in an oven-dried round bottom flask charged with a stir bar, DMF (25 mL) was added to 1-bromo-2-naphthol (5.58 g, 1 equiv, 25 mmol) and K<sub>2</sub>CO<sub>3</sub> (10.37 g, 3 equiv, 75 mmol). 5-bromopent-1-ene (7.45 g, 2 equiv, 50 mmol) was added via syringe and the reaction was stirred for 18 h at 50 °C. Then H<sub>2</sub>O was added until the salt was dissolved and the desired product was extracted with 3 x 25 mL Et<sub>2</sub>O. The organic layer was then dried over Na<sub>2</sub>SO<sub>4</sub>, filtered and concentrated. The desired product **5** (5.31 g, 73% yield) was isolated via automated flash chromatography followed by crystallization in hexanes as an oil. R<sub>f</sub> = 0.56 in 10% EtOAc/Hexanes, 0.15 in 100% Hexanes.

<sup>1</sup>H NMR (400 MHz, CDCl<sub>3</sub>, δ): 8.27 (d, *J* = 8.9 Hz, 1H), 7.79, (dd, *J* = 8.9 Hz, 2H), 7.59 (t, *J* = 7.1 Hz, 1H), 7.41 (t, *J* = 7.1 Hz, 1H), 7.24 (d, *J* = 8.9 Hz, 1H), 5.86–5.98 (m, 1H), 5.14 (dt, *J* = 1.8 Hz, 1H), 5.06 (dt, *J* = 1.8 Hz, 1H), 4.19 (t, *J* = 6.6 Hz, 2H), 2.38 (q, *J* = 6.6 Hz, 2H), 2.00 (quintet, *J* = 6.6 Hz, 2H).

<sup>13</sup>C NMR (101 MHz, CDCl<sub>3</sub>, δ): 153.4, 137.8, 133.3, 130.0, 128.9, 128.1, 127.7, 126.3, 124.4, 115.5, 115.3, 109.6, 69.4, 30.2, 28.7.

HRMS-DART(*m/z*): Predicted: [M+H]<sup>+</sup>: 291.0379 *m/z* Found: [M+H]<sup>+</sup>: 291.0368 *m/z*.

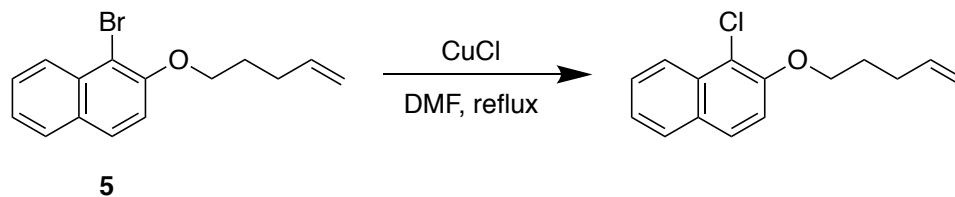

Procedure adapted from Wu, L.; Drinkel, E.; Gaggia, F.; Capolicchio, S.; Linden, A.; Falivene, L.; Cavallo, L.; Dorta, R. *Chem. Eur. J.* **2011**, *17*, 12886–12890.

*1-chloro-2-(pent-4-en-1-yloxy)naphthalene*: Under Ar, 1-bromo-2-(pent-4-en-1-yloxy)naphthalene **5** (2.91 g, 1 equiv, 10 mmol) and CuCl (1.09 g, 1.1 equiv, 11 mmol) were added to an oven dried round bottom flask with a stir bar. The flask was evacuated and refilled with Ar three times. DMF (60 mL) was added and a reflux condenser was fitted to the flask. The flask was evacuated and refilled with Ar three times. The reaction was then heated to reflux and stirred for 18 h. The reaction was then taken off heat and quenched with NH<sub>4</sub>OH and extracted with 25 mL Et<sub>2</sub>O. The organic solution was washed once each with 30% aq NH<sub>4</sub>OH and water. The organic layer was dried over Na<sub>2</sub>SO<sub>4</sub>,

filtered, and concentrated under vacuum. The product (2.26 g, 92% yield) was purified via automated column chromatography (0 to 15% EtOAc in Hexanes) to give a clear oil.  $R_f$  = 0.11 in 100% Hexanes.

$^1\text{H}$  NMR (400 MHz,  $\text{CDCl}_3$ ,  $\delta$ ): 8.25 (d,  $J$  = 8.3 Hz, 1H), 7.77 (m, 2H), 7.58 (dd,  $J$  = 8.3 Hz, 1H), 7.41 (dd,  $J$  = 8.3 Hz, 1H), 7.27 (d,  $J$  = 8.3 Hz, 1H), 5.90 (m, 1H), 5.12 (dq,  $J$  = 1.6 Hz, 1H), 5.07 (dq,  $J$  = 1.6 Hz, 1H), 4.19 (t,  $J$  = 6.6 Hz, 2H), 2.35 (q,  $J$  = 6.6 Hz, 2H), 1.99 (quintet,  $J$  = 6.6 Hz, 2H).

$^{13}\text{C}$  NMR (101 MHz,  $\text{CDCl}_3$ ,  $\delta$ ): 152.1, 137.7, 131.9, 129.5, 128.0, 127.8, 127.3, 124.2, 123.5, 117.5, 115.3, 115.2, 69.2, 30.0, 28.6.

HRMS-DART( $m/z$ ): Predicted:  $[\text{M}+\text{H}]^+$ : 247.0884  $m/z$  Found:  $[\text{M}+\text{H}]^+$ : 247.0890  $m/z$ .

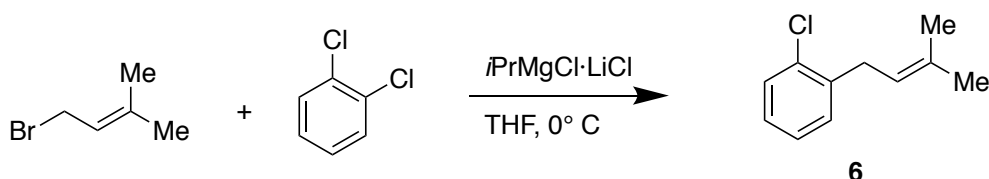

Procedure adapted from Xu, L.; Liu, Z.; Dong, W.; Song, J.; Miao, M.; Xu, J.; Ren, H. *Org. Biomol. Chem.* **2015**, *13*, 6333–6337.

*1-chloro-2-(3-methylbut-2-en-1-yl)benzene (6)*: Under Ar, in an oven-dried round bottom flask charged with a stir bar, 1.2M  $i\text{-PrMgBr}$  LiCl (6 mL, 7.8 mmol, 1.3 equiv) is added to 1-chloro-2-iodo benzene (0.72 g, 6 mmol, 1 equiv) in THF (5 mL) at  $0^\circ\text{C}$ . This reaction was stirred for 2h and monitored for conversion. Then prenylbromide (2.1 g, 18 mmol, 3 equiv) was added, the reaction is warmed to room temperature and stirred for 3 h. Then the reaction was filtered through silica with 100% hexanes and then the solvent was removed via rotary evaporation. Compound **6** (0.35 g, 32% yield) was purified via automated column chromatography with 100% hexanes to give a light yellow oil.  $R_f$  = 0.63 in 100% hexanes

$^1\text{H}$  NMR (400 MHz,  $\text{CDCl}_3$ ,  $\delta$ ): 7.34 (dd,  $J$  = 7.9 Hz, 1H), 7.15–7.24 (m, 2H), 7.10–7.15 (m, 1H), 5.26–5.32 (m, 1H), 3.44 (d,  $J$  = 7.6 Hz, 2H), 1.76, (d,  $J$  = 1.3, 3H), 1.73 (s, 3H).

$^{13}\text{C}$  NMR (101 MHz,  $\text{CDCl}_3$ ,  $\delta$ ): 139.4, 134.1, 133.7, 130.1, 129.5, 127.3, 126.9, 121.4, 32.2, 25.9, 18.1.

HRMS-DART( $m/z$ ): Predicted:  $[\text{M}-\text{H}]$ : 179.0622  $m/z$  Found:  $[\text{M}-\text{H}]$ : 179.0629  $m/z$ .

### III. Characterization of the Carbonyl –Ene Reaction

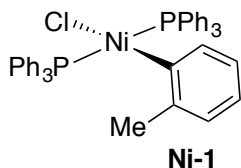

Synthesized via previously reported procedure in a 78% yield.<sup>1</sup>

<sup>1</sup>H NMR (400 MHz, C<sub>6</sub>D<sub>6</sub>, δ): 7.88–7.71 (m, 12H), 7.31 (d, *J* = 7.6 Hz, 1H), 7.07–6.91 (m, 18H), 6.45 (t, *J* = 7.2 Hz, 1H), 6.25 (t, *J* = 7.5 Hz, 1H), 6.18 (d, *J* = 7.4 Hz, 1H), 2.45 (s, 3H).

<sup>13</sup>C NMR (101 MHz, C<sub>6</sub>D<sub>6</sub>, δ): 151.4 (t, *J* = 32.8 Hz), 144.1 (t, *J* = 3.3 Hz), 136.9 (t, *J* = 4.0 Hz), 134.6 (t, *J* = 5.5 Hz), 131.6 (t, *J* = 21.0 Hz), 129.6, 129.0 (t, *J* = 3.1 Hz), 127.6 (t, *J* = 4.7 Hz), 123.6 (t, *J* = 2.3 Hz), 122.0 (t, *J* = 2.3 Hz), 26.8.

<sup>31</sup>P NMR (121 MHz, C<sub>6</sub>D<sub>6</sub>, δ): 22.0.

Consistent with previously reported characterization data.<sup>4</sup>

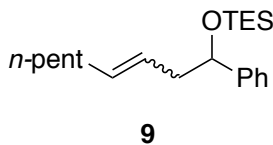

<sup>1</sup>H NMR (400 MHz, CDCl<sub>3</sub>, δ): 7.22–7.40 (m, 5H), 5.36–5.50 (m, 2H), 4.61 (dd, *J* = 5.8 Hz, 1H), 2.43 (quintet, *J* = 6.2 Hz, 1H), 2.33 (quintet, *J* = 5.8 Hz, 1H); 1.33 (m, 2H), 0.90 (t, *J* = 7.6 Hz, 12H), 0.57 (dq, *J* = 7.6 Hz, 6H).

<sup>13</sup>C NMR (101 MHz, CDCl<sub>3</sub>, δ): 145.5, 133.2, 128.1, 127.1, 126.5, 126.1, 75.5, 44.4, 32.8, 31.7, 29.3, 22.7, 14.2, 7.0, 5.1.

HRMS-DART (*m/z*): Predicted: [M+H]<sup>+</sup>: 331.2452 Found: [M+H]<sup>+</sup>: 331.2455.

Consistent with previously reported characterization data.<sup>1</sup>

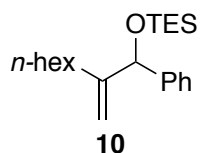

PCy<sub>2</sub>Ph was used instead of PPh<sub>3</sub> to synthesize **10**.

<sup>1</sup>H NMR (400 MHz, CDCl<sub>3</sub>, δ): 7.33–7.38 (m, 2H), 7.29 (d, *J* = 7.0 Hz, 2H), 7.19–7.25 (m, 1H), 5.21 (dq, *J* = 1.4 Hz, 1H), 5.13 (s, 1H), 4.86 (qd, *J* = 1.4 Hz, 1H), 1.88–2.01 (m, 1H), 1.69–1.80 (m, 1H), 1.18–1.37 (m, 8H), 0.92 (t, *J* = 8.0 Hz, 9H), 0.87 (t, *J* = 8.0 Hz, 3H), 0.60 (dq, *J* = 8.0 Hz, 6H).

<sup>13</sup>C NMR (101 MHz, CDCl<sub>3</sub>, δ): 152.2, 143.7, 128.0, 127.0, 126.5, 109.4, 78.2, 31.9, 30.7, 29.3, 27.8, 22.8, 14.2, 7.0, 5.0.

Consistent with previously reported characterization data.<sup>1</sup>

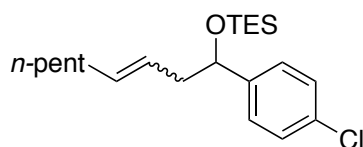

<sup>1</sup>H NMR (400 MHz, CDCl<sub>3</sub>, δ): 7.29–7.24 (m, 4H), 5.28–5.43 (m, 2H), 4.60 (dd, *J* = 6.0 Hz, 1H), 2.24–2.42 (m, 2H), 1.88–1.97 (m, 2H), 1.21–1.59 (m, 6H), 0.94 (t, *J* = 7.8 Hz, 3H), 0.86 (t, *J* = 7.8 Hz, 9H), 0.50 (q, *J* = 7.8 Hz, 6H).

<sup>13</sup>C NMR (101 MHz, CDCl<sub>3</sub>, δ): 144.1, 133.8, 132.3, 128.2, 127.5, 126.1, 75.0, 44.4, 32.7, 31.5, 29.2, 22.7, 14.2, 6.9, 5.0.

Consistent with previously reported characterization data.<sup>1</sup>

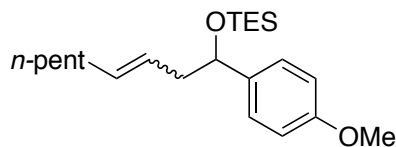

<sup>1</sup>H NMR (400 MHz, CDCl<sub>3</sub>, δ): 7.23 (d, *J* = 8.8 Hz, 2H), 6.84 (d, *J* = 8.8 Hz, 2H), 5.33–5.43 (m, 2H), 4.60 (dd, *J* = 6.2 Hz, 1H), 3.81 (s, 3H), 2.27–2.42 (m, 2H), 1.93–1.98 (m, 2H), 1.22–1.60 (m, 6H), 0.95 (t, *J* = 8.1 Hz, 3H), 0.88 (t, *J* = 8.1 Hz, 9H), 0.53 (q, *J* = 8.1 Hz, 6H).

<sup>13</sup>C NMR (101 MHz, CDCl<sub>3</sub>, δ): 158.7, 137.8, 133.1, 127.2, 126.7, 113.4, 75.1, 55.3, 44.5, 32.8, 31.5, 29.3, 22.7, 14.2, 7.0, 5.0.

Consistent with previously reported characterization data.<sup>1</sup>

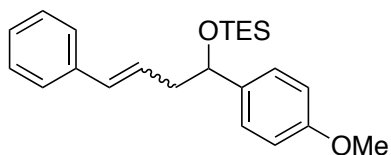

$^1\text{H}$  NMR (400 MHz,  $\text{CDCl}_3$ ,  $\delta$ ): 7.28–7.46 (m, 7H), 6.96 (d,  $J = 8.8$  Hz, 2H), 6.50 (d,  $J = 15.7$  Hz, 1H), 6.32 (dt,  $J = 15.7$  Hz, 1H), 4.83 (dd,  $J = 6.5$  Hz, 1H), 3.87 (s, 3H), 2.62–2.81 (m, 2H), 1.03 (t,  $J = 7.8$  Hz, 2H), 0.70 (q,  $J = 7.8$  Hz, 6H).

$^{13}\text{C}$  NMR (101 MHz,  $\text{CDCl}_3$ ,  $\delta$ ): 158.9, 137.9, 137.6, 132.2, 128.7, 127.4, 127.2, 127.1, 126.2, 113.6, 75.0, 55.3, 45.0, 7.0, 5.1.

Consistent with previously reported characterization data.<sup>1</sup>

#### IV. Procedure and Characterization for Authentic Heck Product.

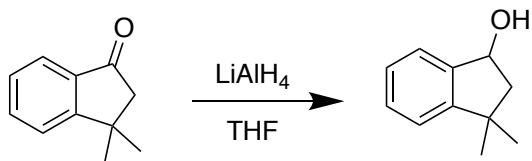

Procedure adapted from Knorr, R.; Stephenson, D. S.; Lattke, E.; Böhrer, P.; Ruhdorfer, J. *Beilstein J. Org. Chem.* **2016**, *12*, 1178–1184.

In an oven dried round bottom flask attached to an Ar line, 1M lithium aluminum hydride (0.60 mL, 0.6 mmol, 2 equiv) was added dropwise to a solution of 3,3-dimethyl-2,3-dihydroinden-1-one (48 mg, 0.3 mmol, 1 equiv) in 4 mL of THF at 0 °C. This reaction was stirred for 3 h. The reaction was then quenched with aq. NaOH at 0 °C. The desired product was extracted with 2 x 5 mL of Et<sub>2</sub>O, washed with 1 x 5 mL portion of brine, and dried over NaSO<sub>4</sub> to give the desired product (41 mg, 83% yield).

<sup>1</sup>H NMR (400 MHz, CDCl<sub>3</sub>, δ): 7.40 (d, *J* = 7.3 Hz, 1H), 7.27–7.33 (m, 2H), 7.21 (d, *J* = 7.3 Hz, 1H), 5.27 (t, *J* = 6.6 Hz, 1H), 2.39 (dd, *J* = 6.6 Hz, 1H), 1.84 (dd, *J* = 6.0 Hz, 1H), 1.70 (brs, 1H, OH), 1.40 (s, 3H), 1.23 (s, 3H).

<sup>13</sup>C NMR (101 MHz, CDCl<sub>3</sub>, δ): 152.0, 143.8, 128.7, 127.1, 124.2, 122.5, 74.7, 52.1, 42.4, 30.1, 30.0.

Consistent with previously reported characterization data.<sup>5</sup>

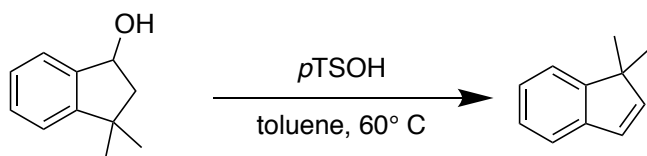

**11**

Procedure adapted from Knorr, R.; Stephenson, D. S.; Lattke, E.; Böhrer, P.; Ruhdorfer, J. *Beilstein J. Org. Chem.* **2016**, *12*, 1178–1184.

In a round bottom flask, *p*-toluenesulfonic acid (4 mg, 0.022 mmol, 0.1 equiv) was added via syringe to a stirred solution of 3,3-dimethyl-2,3-dihydroinden-1-ol (36 mg, 1 equiv 0.22 mmol) in 5 mL of toluene. The reaction was then heated to 60 °C for 2 h. The reaction is then cooled to room temperature and quenched with aq. NaOH. The product is extracted with 2 x 5 mL portions of Et<sub>2</sub>O and washed with 1 x 5 mL portion of brine. The product is dried over NaSO<sub>4</sub> and purified via automated column chromatography to give desired product **11** as a clear oil (11 mg, 35% yield).

$^1\text{H}$  NMR (400 MHz,  $\text{CDCl}_3$ ,  $\delta$ ): 7.20–7.36 (m, 4H), 6.65 (d,  $J = 5.4$  Hz, 1H), 6.39 (d,  $J = 5.4$  Hz, 1H), 1.34 (s, 6H).

$^{13}\text{C}$  NMR (101 MHz,  $\text{CDCl}_3$ ,  $\delta$ ): 153.4, 147.5, 142.8, 127.8, 126.5, 125.2, 121.3, 121.0, 49.8, 24.6.

Consistent with previously reported characterization data.<sup>6</sup>

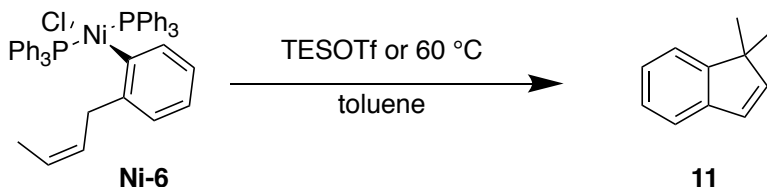

*Heat activation:* In an oven-dried 2 dram vial, 3 mL of toluene was added to precatalyst **Ni-6** (20 mg, 1 equiv). The reaction was heated to 60 °C for 24 hours. The reaction was then cooled to room temperature and filtered through a plug of silica. The contents were then analyzed by GC/MS and HRMS.

*TESOTf activation:* In an oven-dried 2 dram vial, TESOTf (2 equiv) was added to precatalyst **Ni-6** (20 mg, 1 equiv) in toluene (3 mL). The reaction was stirred for 24 hours. The reaction was then opened to air and filtered through a plug of silica. The contents were then analyzed by GC/MS.

HRMS-DART ( $m/z$ ): Predicted:  $[\text{M}+\text{H}]^+$ : 145.1012 Found:  $[\text{M}+\text{H}]^+$ : 145.1011

## V. X-Ray Diffraction Characterization of the Precatalysts.

*General Information:* Low temperature diffraction data ( $\phi$ -and  $\omega$ -scans) was collected on a Bruker X8 Kappa DUO four-cycle diffractometer coupled to a Smart Apex2 CCD detector for complexes **Ni-2**, **Ni-3a**, **Ni-3b**, **Ni-5a**, and **Ni-6** with Mo K $\alpha$  radiation ( $\lambda = 0.71073$  Å) from an I $\mu$ S micro-source. The crystal structures were then solved using SHELXS<sup>7</sup> and refined against  $F^2$  on all data by full-matrix least squares with SHELXL-97,<sup>8</sup> following established refinement strategies.<sup>9</sup> All hydrogen atoms bound to carbon atoms were included into the model at geometrically calculated positions using AFIX/HFIX commands and refined using a riding model. The isotropic displacement parameter of all hydrogen atoms was fixed to 1.2 times the U value of the atoms they are linked to (1.5 times for methyl groups). All non-H atoms were refined anisotropically.



**Figure S1.** Thermal ellipsoid depiction of compound **Ni-2**. ORTEP at 50% probability.

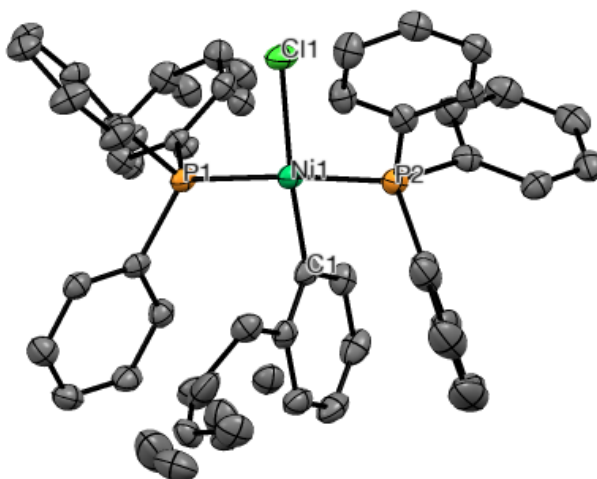

**Figure S2.** Thermal ellipsoid depiction of compound **Ni-2**. ORTEP at 50% probability with disorder omitted.

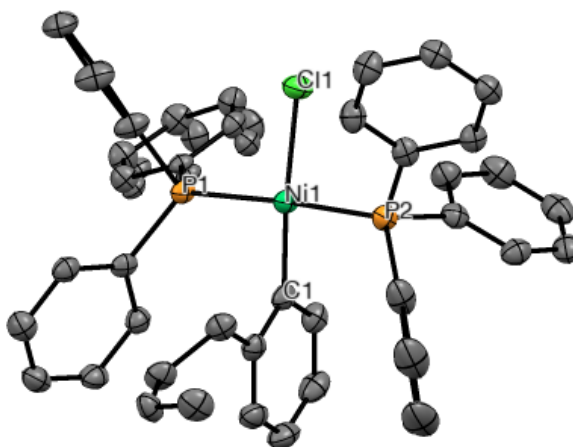

The crystal structure of **Ni-2** was disordered over the aliphatic side chain.

**Table S1.** Crystal data and structure refinement for compound **Ni-2**.

|                                                             |                                                                  |
|-------------------------------------------------------------|------------------------------------------------------------------|
| <b>Identification code</b>                                  | X17053                                                           |
| <b>Empirical formula</b>                                    | C <sub>47</sub> H <sub>43</sub> Cl <sub>3</sub> NiP <sub>2</sub> |
| <b>Formula weight</b>                                       | 834.81                                                           |
| <b>Temperature</b>                                          | 100(2) K                                                         |
| <b>Wavelength</b>                                           | 0.71073 Å                                                        |
| <b>Crystal system</b>                                       | Monoclinic                                                       |
| <b>Space group</b>                                          | P2 <sub>1</sub> /n                                               |
| <b>Unit cell dimensions</b>                                 | a = 11.824(3) Å<br>b = 24.861(7) Å<br>c = 13.999(4) Å            |
| <b>Volume</b>                                               | 4073.7(19) Å <sup>3</sup>                                        |
| <b>Z</b>                                                    | 4                                                                |
| <b>Density (calculated)</b>                                 | 1.361 Mg/m <sup>3</sup>                                          |
| <b>Absorption coefficient</b>                               | 0.785 mm <sup>-1</sup>                                           |
| <b>F(000)</b>                                               | 1736                                                             |
| <b>Crystal size</b>                                         | 0.603 x 0.061 x 0.045 mm <sup>3</sup>                            |
| <b>Theta range for data collection</b>                      | 1.923 to 27.479°                                                 |
| <b>Index ranges</b>                                         | -15 ≤ h ≤ 15, -32 ≤ k ≤ 32, -18 ≤ l ≤ 18                         |
| <b>Reflections collected</b>                                | 62825                                                            |
| <b>Independent reflections</b>                              | 9348 [ <i>R</i> <sub>int</sub> = 0.0634]                         |
| <b>Completeness to theta = 25.242°</b>                      | 100%                                                             |
| <b>Absorption correction</b>                                | Semi-empirical from equivalents                                  |
| <b>min and max transmission</b>                             | 0.6641 and 0.7462                                                |
| <b>Refinement method</b>                                    | Full-matrix least-squares on <i>F</i> <sup>2</sup>               |
| <b>Data/restraints/parameters</b>                           | 9348/683/644                                                     |
| <b>Goodness-of-fit on <i>F</i><sup>2</sup></b>              | 1.074                                                            |
| <b>Largest diff. peak and hole</b>                          | 0.763 and -0.804 e.Å <sup>-3</sup>                               |
| <b><i>R</i> indices on all data</b>                         | <i>R</i> 1 = 0.0733, <i>wR</i> 2 = 0.1247                        |
| <b>Final <i>R</i> indices [<i>I</i> &gt; 2 σ(<i>I</i>)]</b> | <i>R</i> 1 = 0.0507, <i>wR</i> 2 = 0.1143                        |

**Figure S3.** Thermal ellipsoid depiction of compound **Ni-3a**. ORTEP at 50% probability.

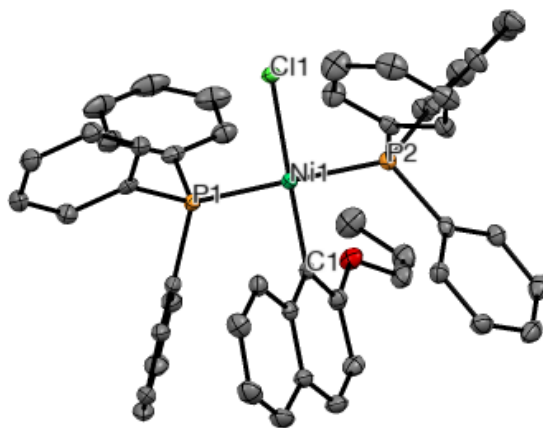

The residual density in the structure is likely caused by minor non-merohedral twinning.

**Table S2.** Crystal data and structure refinement for compound **Ni-3a**.

|                                                             |                                                                      |
|-------------------------------------------------------------|----------------------------------------------------------------------|
| <b>Identification code</b>                                  | X17027                                                               |
| <b>Empirical formula</b>                                    | C <sub>49.50</sub> H <sub>42</sub> Cl <sub>2</sub> NiOP <sub>2</sub> |
| <b>Formula weight</b>                                       | 844.38                                                               |
| <b>Temperature</b>                                          | 100(2) K                                                             |
| <b>Wavelength</b>                                           | 0.71073 Å                                                            |
| <b>Crystal system</b>                                       | Monoclinic                                                           |
| <b>Space group</b>                                          | P2 <sub>1</sub> /n                                                   |
| <b>Unit cell dimensions</b>                                 | a = 20.485(3) Å<br>b = 10.3610(15) Å<br>c = 21.371(3) Å              |
| <b>Volume</b>                                               | 4082.4(11) Å <sup>3</sup>                                            |
| <b>Z</b>                                                    | 4                                                                    |
| <b>Density (calculated)</b>                                 | 1.374 Mg/m <sup>3</sup>                                              |
| <b>Absorption coefficient</b>                               | 0.723 mm <sup>-1</sup>                                               |
| <b>F(000)</b>                                               | 1756                                                                 |
| <b>Crystal size</b>                                         | 0.071 x 0.057 x 0.054 mm <sup>3</sup>                                |
| <b>Theta range for data collection</b>                      | 2.26 to 27.26°                                                       |
| <b>Index ranges</b>                                         | -26 ≤ h ≤ 26, -11 ≤ k ≤ 13, -24 ≤ l ≤ 27                             |
| <b>Reflections collected</b>                                | 68545                                                                |
| <b>Independent reflections</b>                              | 9016 [ <i>R</i> <sub>int</sub> = 0.0713]                             |
| <b>Completeness to theta = 25.242°</b>                      | 100%                                                                 |
| <b>Absorption correction</b>                                | Semi-empirical from equivalents                                      |
| <b>Min and max transmission</b>                             | 0.6783 and 0.7458                                                    |
| <b>Refinement method</b>                                    | Full-matrix least-squares on <i>F</i> <sup>2</sup>                   |
| <b>Data/restraints/parameters</b>                           | 9016/22/515                                                          |
| <b>Goodness-of-fit on <i>F</i><sup>2</sup></b>              | 1.049                                                                |
| <b>Largest diff. peak and hole</b>                          | 2.607 and -0.533 e.Å <sup>-3</sup>                                   |
| <b><i>R</i> indices on all data</b>                         | <i>R</i> 1 = 0.0775, <i>wR</i> 2 = 0.1598                            |
| <b>Final <i>R</i> indices [<i>I</i> &gt; 2 σ(<i>I</i>)]</b> | <i>R</i> 1 = 0.0587, <i>wR</i> 2 = 0.1487                            |

**Figure S4.** Thermal ellipsoid depiction of compound **Ni-3b**. ORTEP at 50% probability.

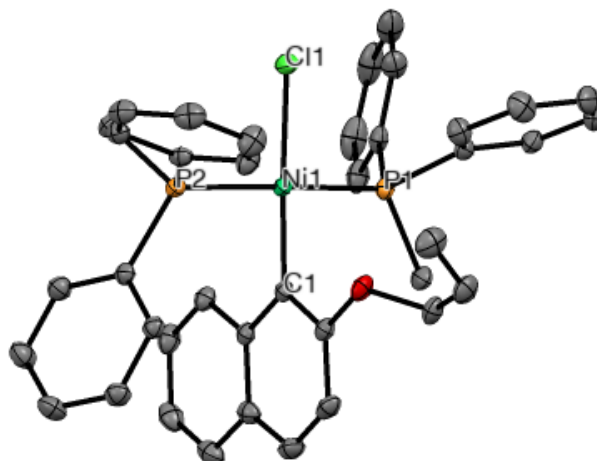

**Table S3.** Crystal data and structure refinement for compound **Ni-3b**.

|                                                             |                                                             |
|-------------------------------------------------------------|-------------------------------------------------------------|
| <b>Identification code</b>                                  | X17050                                                      |
| <b>Empirical formula</b>                                    | C <sub>39</sub> H <sub>37</sub> ClNiOP <sub>2</sub>         |
| <b>Formula weight</b>                                       | 677.78                                                      |
| <b>Temperature</b>                                          | 100(2) K                                                    |
| <b>Wavelength</b>                                           | 0.71073 Å                                                   |
| <b>Crystal system</b>                                       | Monoclinic                                                  |
| <b>Space group</b>                                          | P2 <sub>1</sub> /c                                          |
| <b>Unit cell dimensions</b>                                 | a = 15.3185(14) Å<br>b = 14.2565(13) Å<br>c = 16.5433(15) Å |
| <b>Volume</b>                                               | 3348.9(5) Å <sup>3</sup>                                    |
| <b>Z</b>                                                    | 4                                                           |
| <b>Density (calculated)</b>                                 | 1.344 Mg/m <sup>3</sup>                                     |
| <b>Absorption coefficient</b>                               | 0.785 mm <sup>-1</sup>                                      |
| <b>F(000)</b>                                               | 1416                                                        |
| <b>Crystal size</b>                                         | 0.453 x 0.151 x 0.132 mm <sup>3</sup>                       |
| <b>Theta range for data collection</b>                      | 2.50 to 29.86°                                              |
| <b>Index ranges</b>                                         | -21 ≤ h ≤ 21, -20 ≤ k ≤ 20, -23 ≤ l ≤ 23                    |
| <b>Reflections collected</b>                                | 98757                                                       |
| <b>Independent reflections</b>                              | 9795 [ <i>R</i> <sub>int</sub> = 0.0560]                    |
| <b>Completeness to theta = 25.242°</b>                      | 100%                                                        |
| <b>Absorption correction</b>                                | Semi-empirical from equivalents                             |
| <b>Min and max transmission</b>                             | 0.6745 and 0.7461                                           |
| <b>Refinement method</b>                                    | Full-matrix least-squares on <i>F</i> <sup>2</sup>          |
| <b>Data/restraints/parameters</b>                           | 9795/0/400                                                  |
| <b>Goodness-of-fit on <i>F</i><sup>2</sup></b>              | 1.033                                                       |
| <b>Largest diff. peak and hole</b>                          | 0.47 and -0.503 e.Å <sup>-3</sup>                           |
| <b><i>R</i> indices on all data</b>                         | <i>R</i> 1 = 0.0420 <i>wR</i> 2 = 0.0778                    |
| <b>Final <i>R</i> indices [<i>I</i> &gt; 2 σ(<i>I</i>)]</b> | <i>R</i> 1 = 0.0312, <i>wR</i> 2 = 0.0731                   |

**Figure S5.** Thermal ellipsoid depiction of compound **Ni-5a**. ORTEP at 50% probability. The disorder was omitted for clarity.

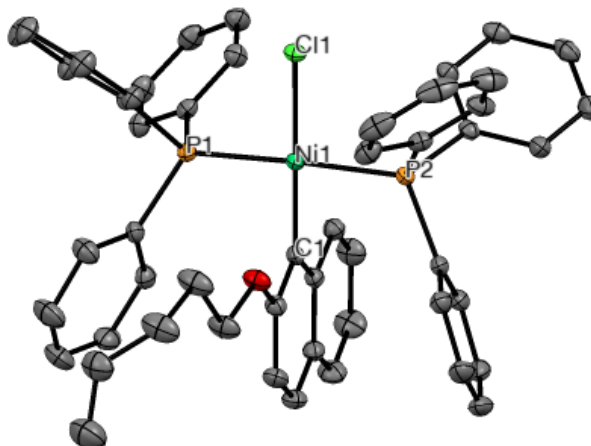

**Figure S6.** Thermal ellipsoid depiction of compound **Ni-5a**. ORTEP at 50% probability with disorder around the aliphatic chain.

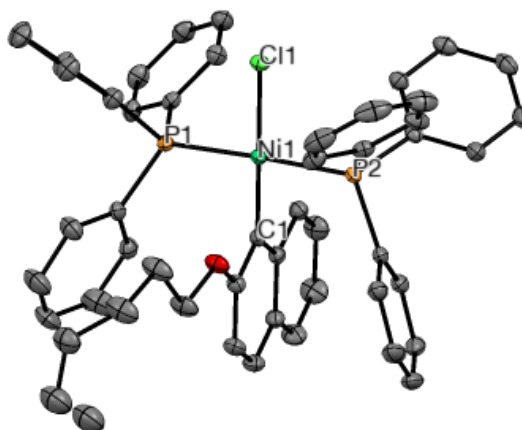

The crystal structure of **Ni-5a** was disordered over the aliphatic side chain.

**Table S4.** Crystal data and structure refinement for compound **Ni-5a**.

|                                                             |                                                                      |
|-------------------------------------------------------------|----------------------------------------------------------------------|
| <b>Identification code</b>                                  | X17049                                                               |
| <b>Empirical formula</b>                                    | C <sub>51.50</sub> H <sub>46</sub> Cl <sub>2</sub> NiOP <sub>2</sub> |
| <b>Formula weight</b>                                       | 872.43                                                               |
| <b>Temperature</b>                                          | 100(2) K                                                             |
| <b>Wavelength</b>                                           | 0.71073 Å                                                            |
| <b>Crystal system</b>                                       | Monoclinic                                                           |
| <b>Space group</b>                                          | C2/c                                                                 |
| <b>Unit cell dimensions</b>                                 | a = 21.060(6) Å<br>b = 10.421(3) Å<br>c = 39.473(11) Å               |
| <b>Volume</b>                                               | 8662(4) Å <sup>3</sup>                                               |
| <b>Z</b>                                                    | 8                                                                    |
| <b>Density (calculated)</b>                                 | 1.338 Mg/m <sup>3</sup>                                              |
| <b>Absorption coefficient</b>                               | 0.683 mm <sup>-1</sup>                                               |
| <b>F(000)</b>                                               | 3640                                                                 |
| <b>Crystal size</b>                                         | 0.420 x 0.380 x 0.271 mm <sup>3</sup>                                |
| <b>Theta range for data collection</b>                      | 1.934 to 29.575°                                                     |
| <b>Index ranges</b>                                         | -29 ≤ h ≤ 29, -13 ≤ k ≤ 14, -54 ≤ l ≤ 54                             |
| <b>Reflections collected</b>                                | 106601                                                               |
| <b>Independent reflections</b>                              | 12149 [ <i>R</i> <sub>int</sub> = 0.0654]                            |
| <b>Completeness to theta = 25.242°</b>                      | 100%                                                                 |
| <b>Absorption correction</b>                                | Semi-empirical from equivalents                                      |
| <b>Min and max transmission</b>                             | 0.6593 and 0.7461                                                    |
| <b>Refinement method</b>                                    | Full-matrix least-squares on <i>F</i> <sup>2</sup>                   |
| <b>Data/restraints/parameters</b>                           | 12149/139/548                                                        |
| <b>Goodness-of-fit on <i>F</i><sup>2</sup></b>              | 1.023                                                                |
| <b>Largest diff. peak and hole</b>                          | 0.963 and -0.881 e.Å <sup>-3</sup>                                   |
| <b><i>R</i> indices on all data</b>                         | <i>R</i> 1 = 0.0532, <i>wR</i> 2 = 0.0909                            |
| <b>Final <i>R</i> indices [<i>I</i> &gt; 2 σ(<i>I</i>)]</b> | <i>R</i> 1 = 0.0402, <i>wR</i> 2 = 0.0856                            |



**Figure S7.** Thermal ellipsoid depiction of compound **Ni-6**. ORTEP at 50% probability. The crystal structure of **Ni-6** was disordered over the aliphatic side chain. The disorder was omitted for clarity.

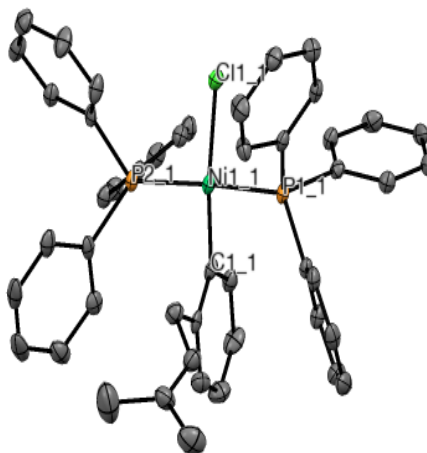

**Figure S8.** Thermal ellipsoid depiction of compound **Ni-6** with disorder. ORTEP at 50% probability.

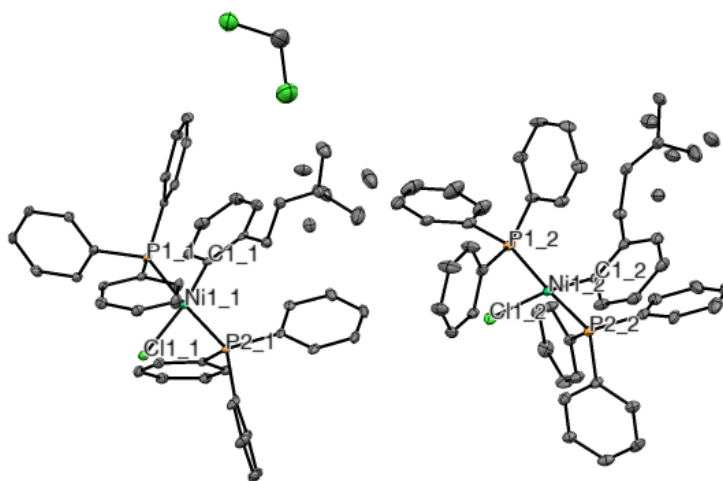

The structure was refined as a two-component non-merohedral twin against the HKLF4 reflections file. Refinement against the HKLF5 file was also attempted but resulted in a poorer fit. The structure contained two molecules in the asymmetric unit, each of which exhibited an alkyl group disordered over two positions; this disorder was modeled with the help of similarity restraints on 1,2- and 1,3- distances and displacement parameters as well as enhanced rigid-bond restraints.

**Table S5.** Crystal data and structure refinement for compound **Ni-6**.

|                                                          |                                                              |                              |
|----------------------------------------------------------|--------------------------------------------------------------|------------------------------|
| <b>Empirical formula</b>                                 | $\text{C}_{95}\text{H}_{88}\text{Cl}_4\text{Ni}_2\text{P}_4$ |                              |
| <b>Formula weight</b>                                    | 1612.75                                                      |                              |
| <b>Temperature</b>                                       | 100(2) K                                                     |                              |
| <b>Wavelength</b>                                        | 0.71073 Å                                                    |                              |
| <b>Crystal system</b>                                    | Triclinic                                                    |                              |
| <b>Space group</b>                                       | P-1                                                          |                              |
| <b>Unit cell dimensions</b>                              | $a = 11.8529(14)$ Å                                          | $a = 100.919(2)^\circ$ .     |
|                                                          | $b = 14.1583(17)$ Å                                          | $b = 92.094(2)^\circ$ .      |
|                                                          | $c = 24.919(3)$ Å                                            | $\gamma = 96.431(2)^\circ$ . |
| <b>Volume</b>                                            | $4073.1(8)$ Å <sup>3</sup>                                   |                              |
| <b>Z</b>                                                 | 2                                                            |                              |
| <b>Density (calculated)</b>                              | 1.315 Mg/m <sup>3</sup>                                      |                              |
| <b>Absorption coefficient</b>                            | 0.719 mm <sup>-1</sup>                                       |                              |
| <b>F(000)</b>                                            | 1684                                                         |                              |
| <b>Crystal size</b>                                      | 0.130 x 0.030 x 0.020 mm <sup>3</sup>                        |                              |
| <b>Theta range for data collection</b>                   | 1.467 to 26.372°                                             |                              |
| <b>Reflections collected</b>                             | 16584                                                        |                              |
| <b>Independent reflections</b>                           | 16584 [ $R_{int} = 0.1199$ ]                                 |                              |
| <b>Completeness to theta = 25.242°</b>                   | 99.7%                                                        |                              |
| <b>Absorption correction</b>                             | Semi-empirical from equivalents                              |                              |
| <b>min and max transmission</b>                          | 0.681983 and 0.746070                                        |                              |
| <b>Refinement method</b>                                 | Full-matrix least-squares on $F^2$                           |                              |
| <b>Data/restraints/parameters</b>                        | 16454/562/1020                                               |                              |
| <b>Goodness-of-fit on <math>F^2</math></b>               | 1.080                                                        |                              |
| <b>Largest diff. peak and hole</b>                       | 0.694 and -1.074 e.Å <sup>-3</sup>                           |                              |
| <b>R indices on all data</b>                             | $R1 = 0.1170$ , $wR2 = 0.1655$                               |                              |
| <b>Final R indices [<math>I &gt; 2 \sigma(I)</math>]</b> | $R1 = 0.0635$ , $wR2 = 0.1478$                               |                              |

## VI. GC/MS Spectra of Heck Activation Product

**Figure S9.** GC/MS trace of Heck activation product **11**.

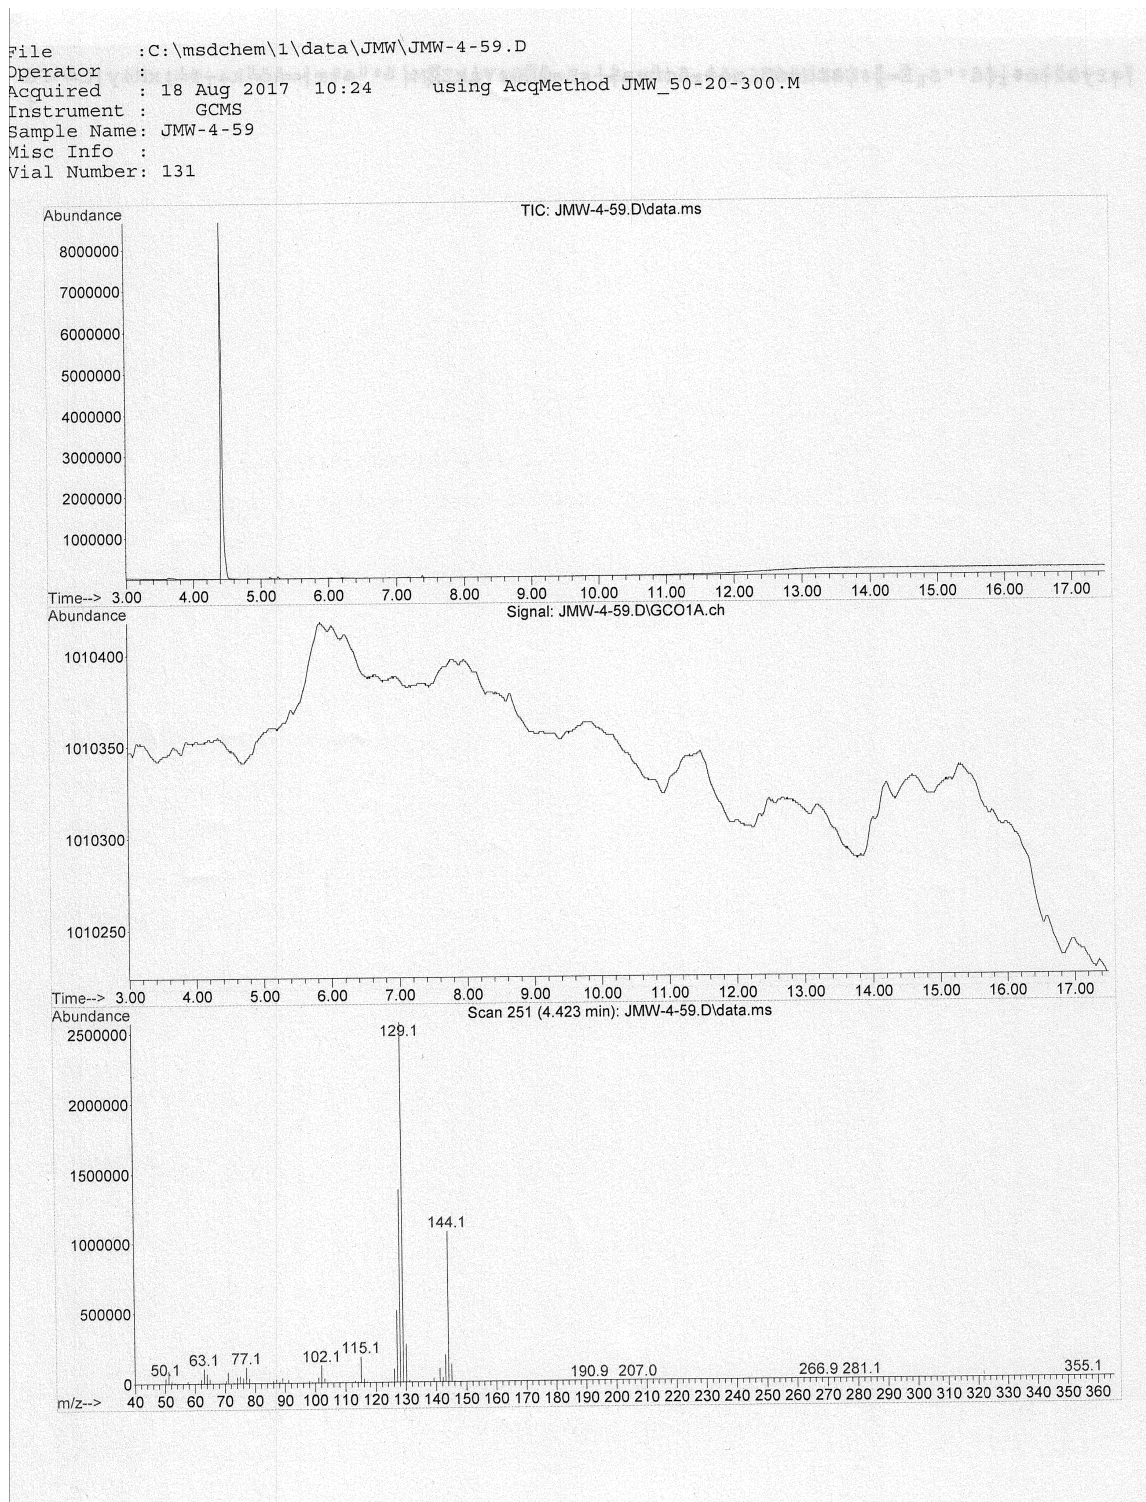

**Figure S10. GC/MS of heat activation of Ni-6.**

File :C:\msdchem\1\data\JMW\JMW-3-229.D  
Operator :  
Acquired : 18 May 2017 14:04 using AcqMethod JMW\_50-20-300.M  
Instrument : GCMS  
Sample Name: JMW-3-229  
Misc Info :  
Vial Number: 141

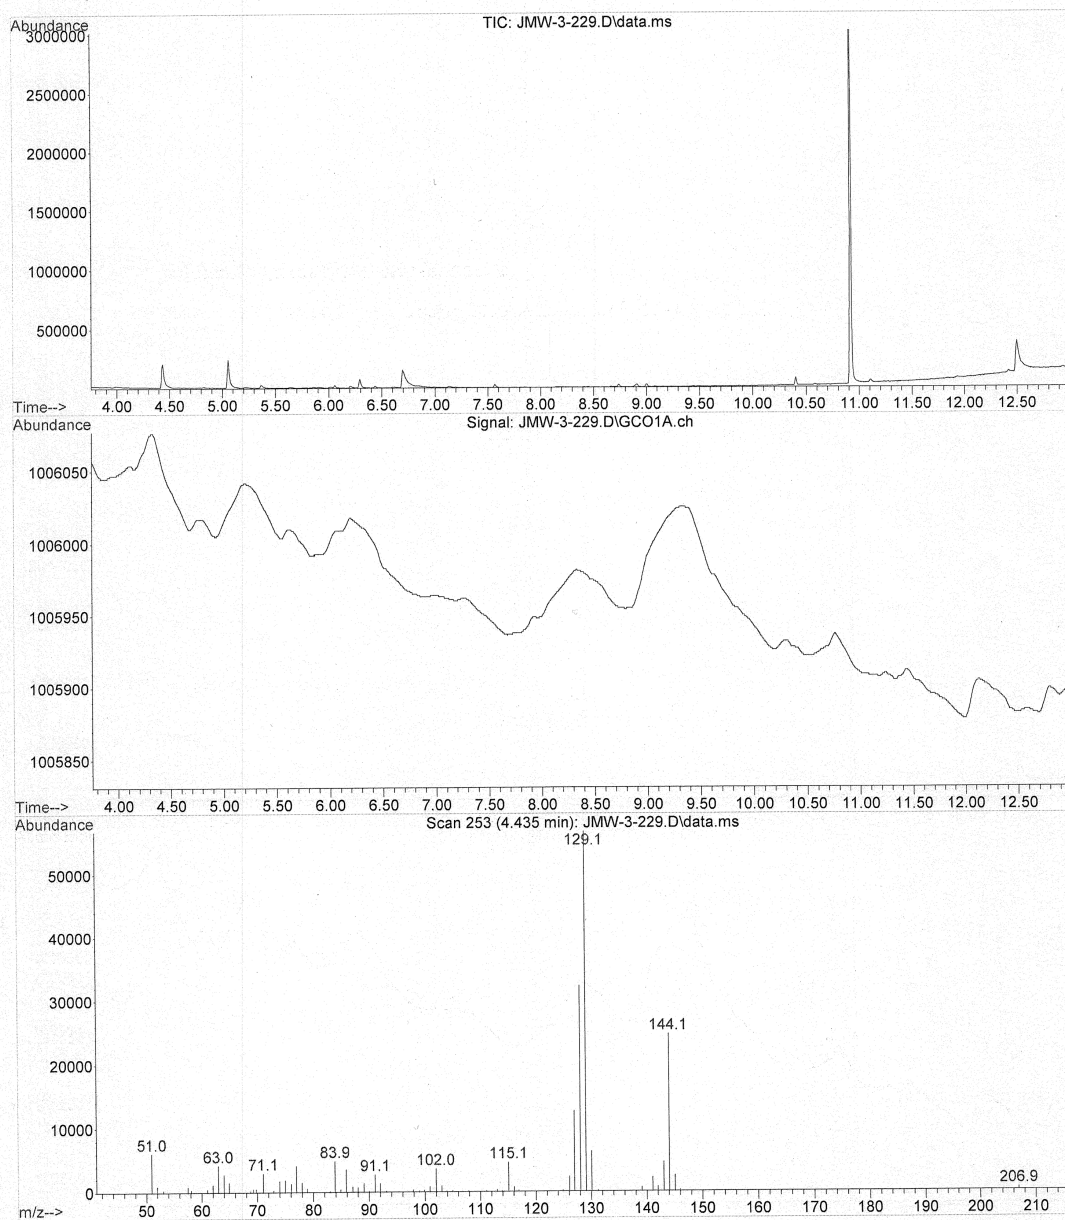

Figure S11. Proton NMR of 2.

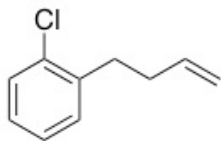

2

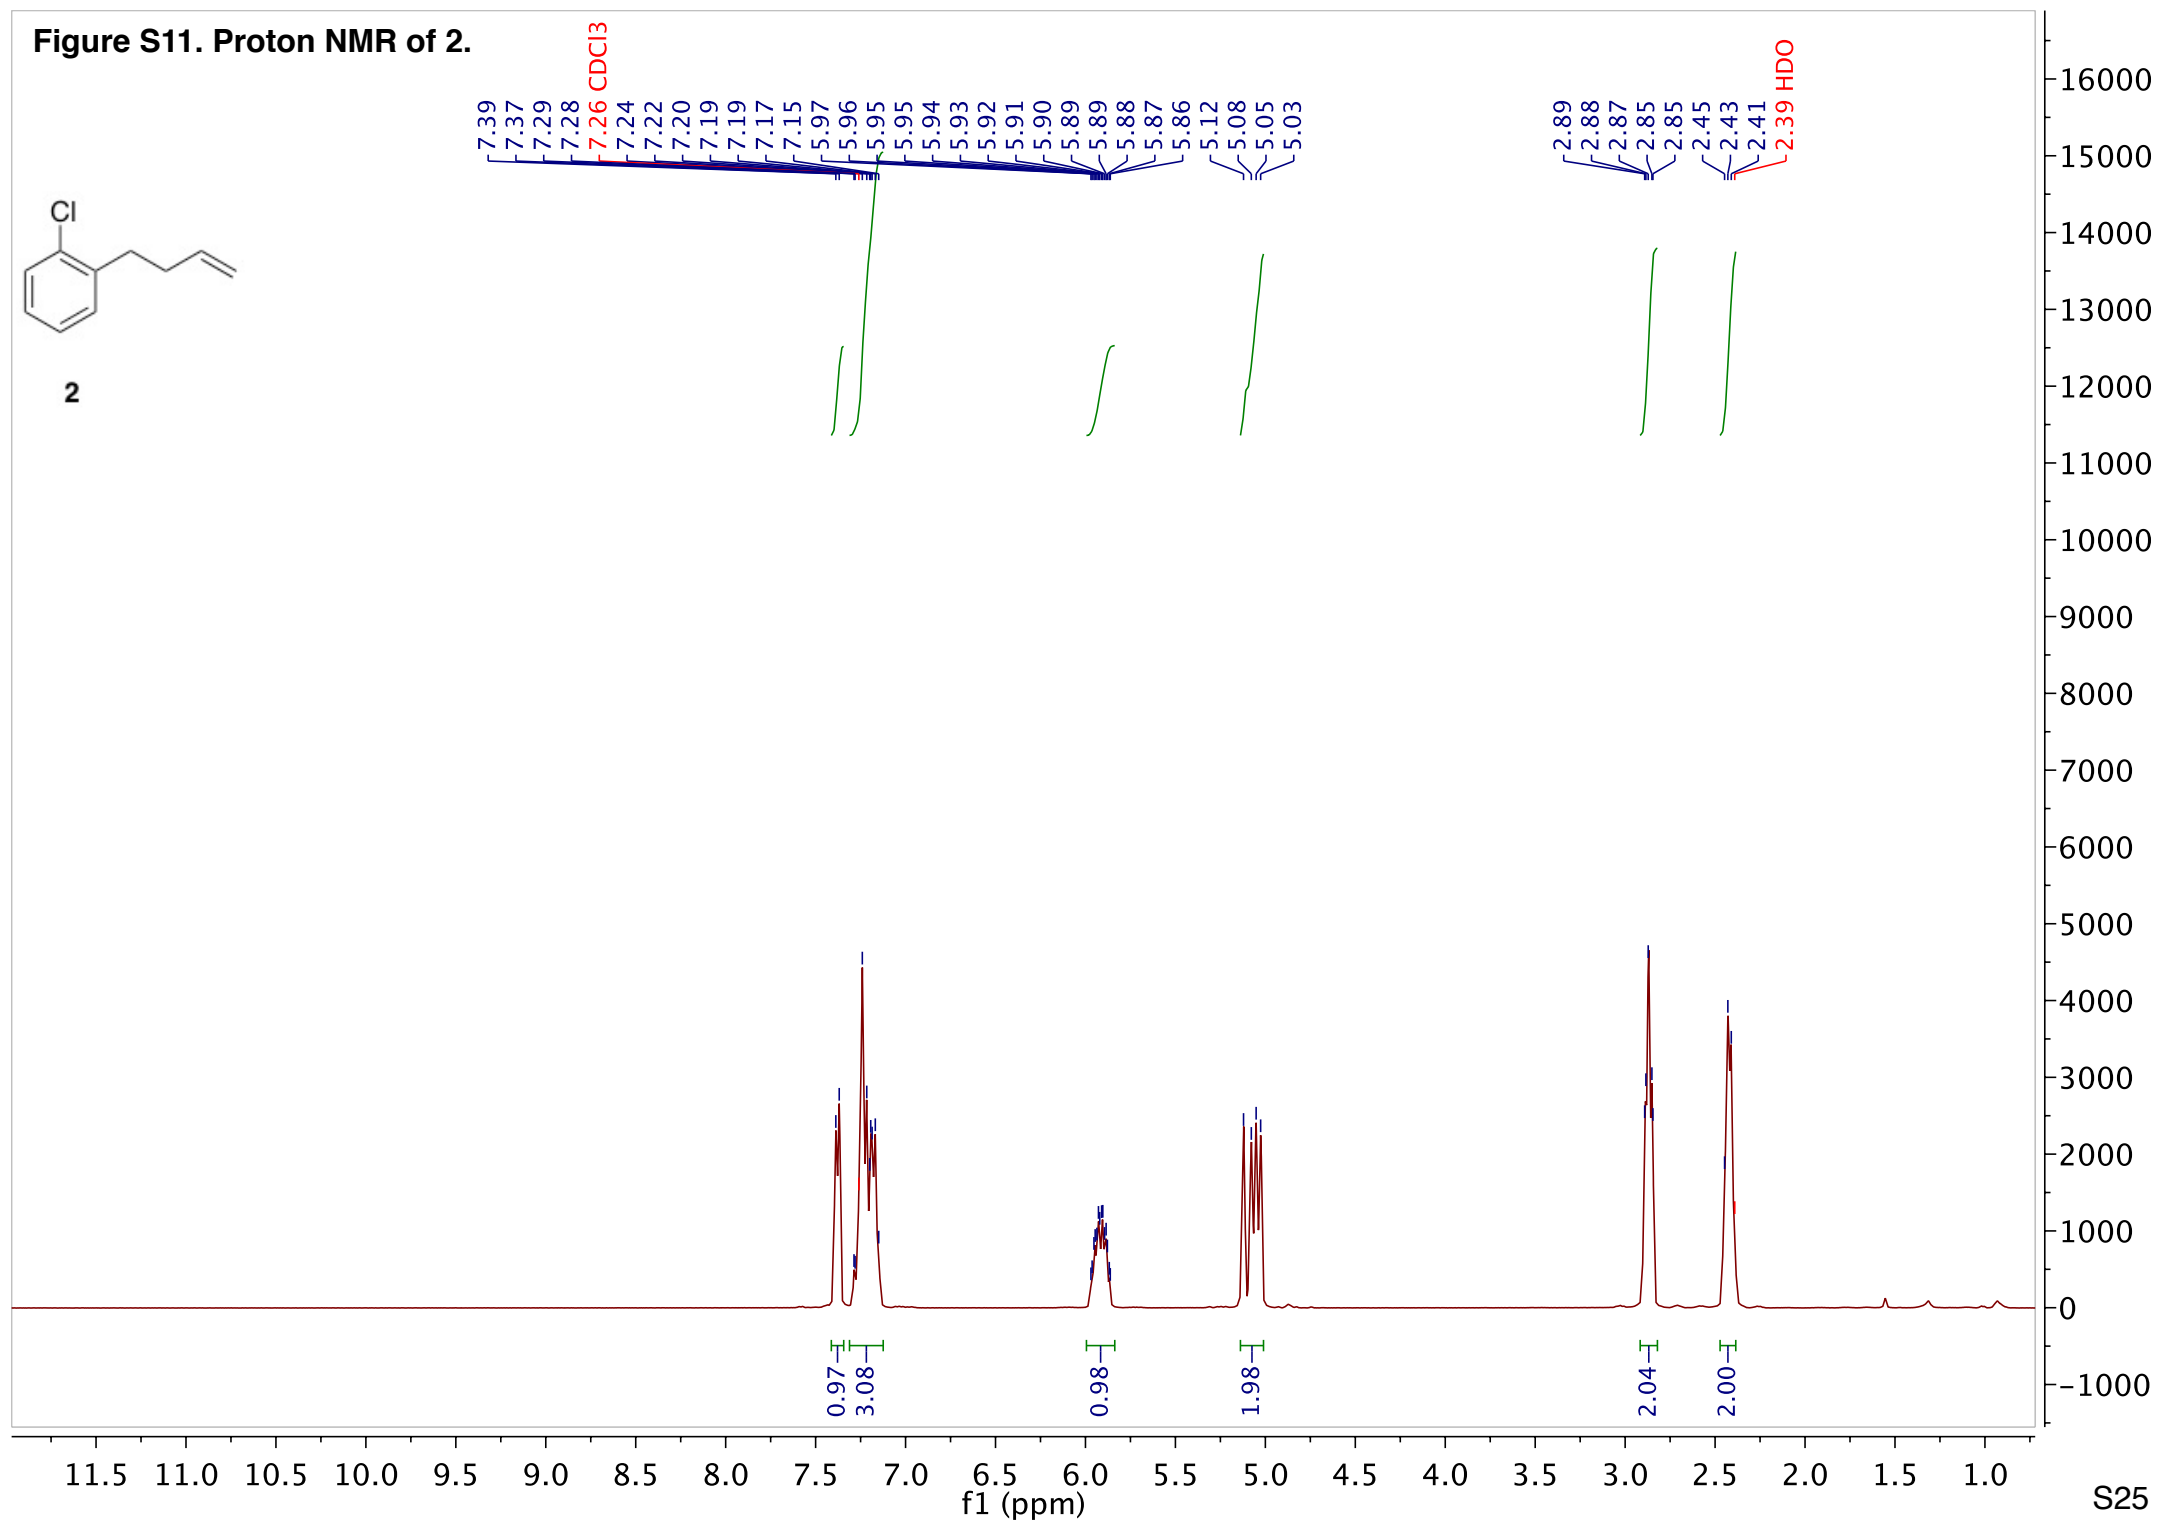

Figure S12. Carbon NMR of 2.

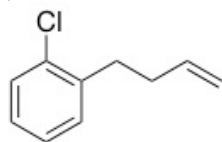

2

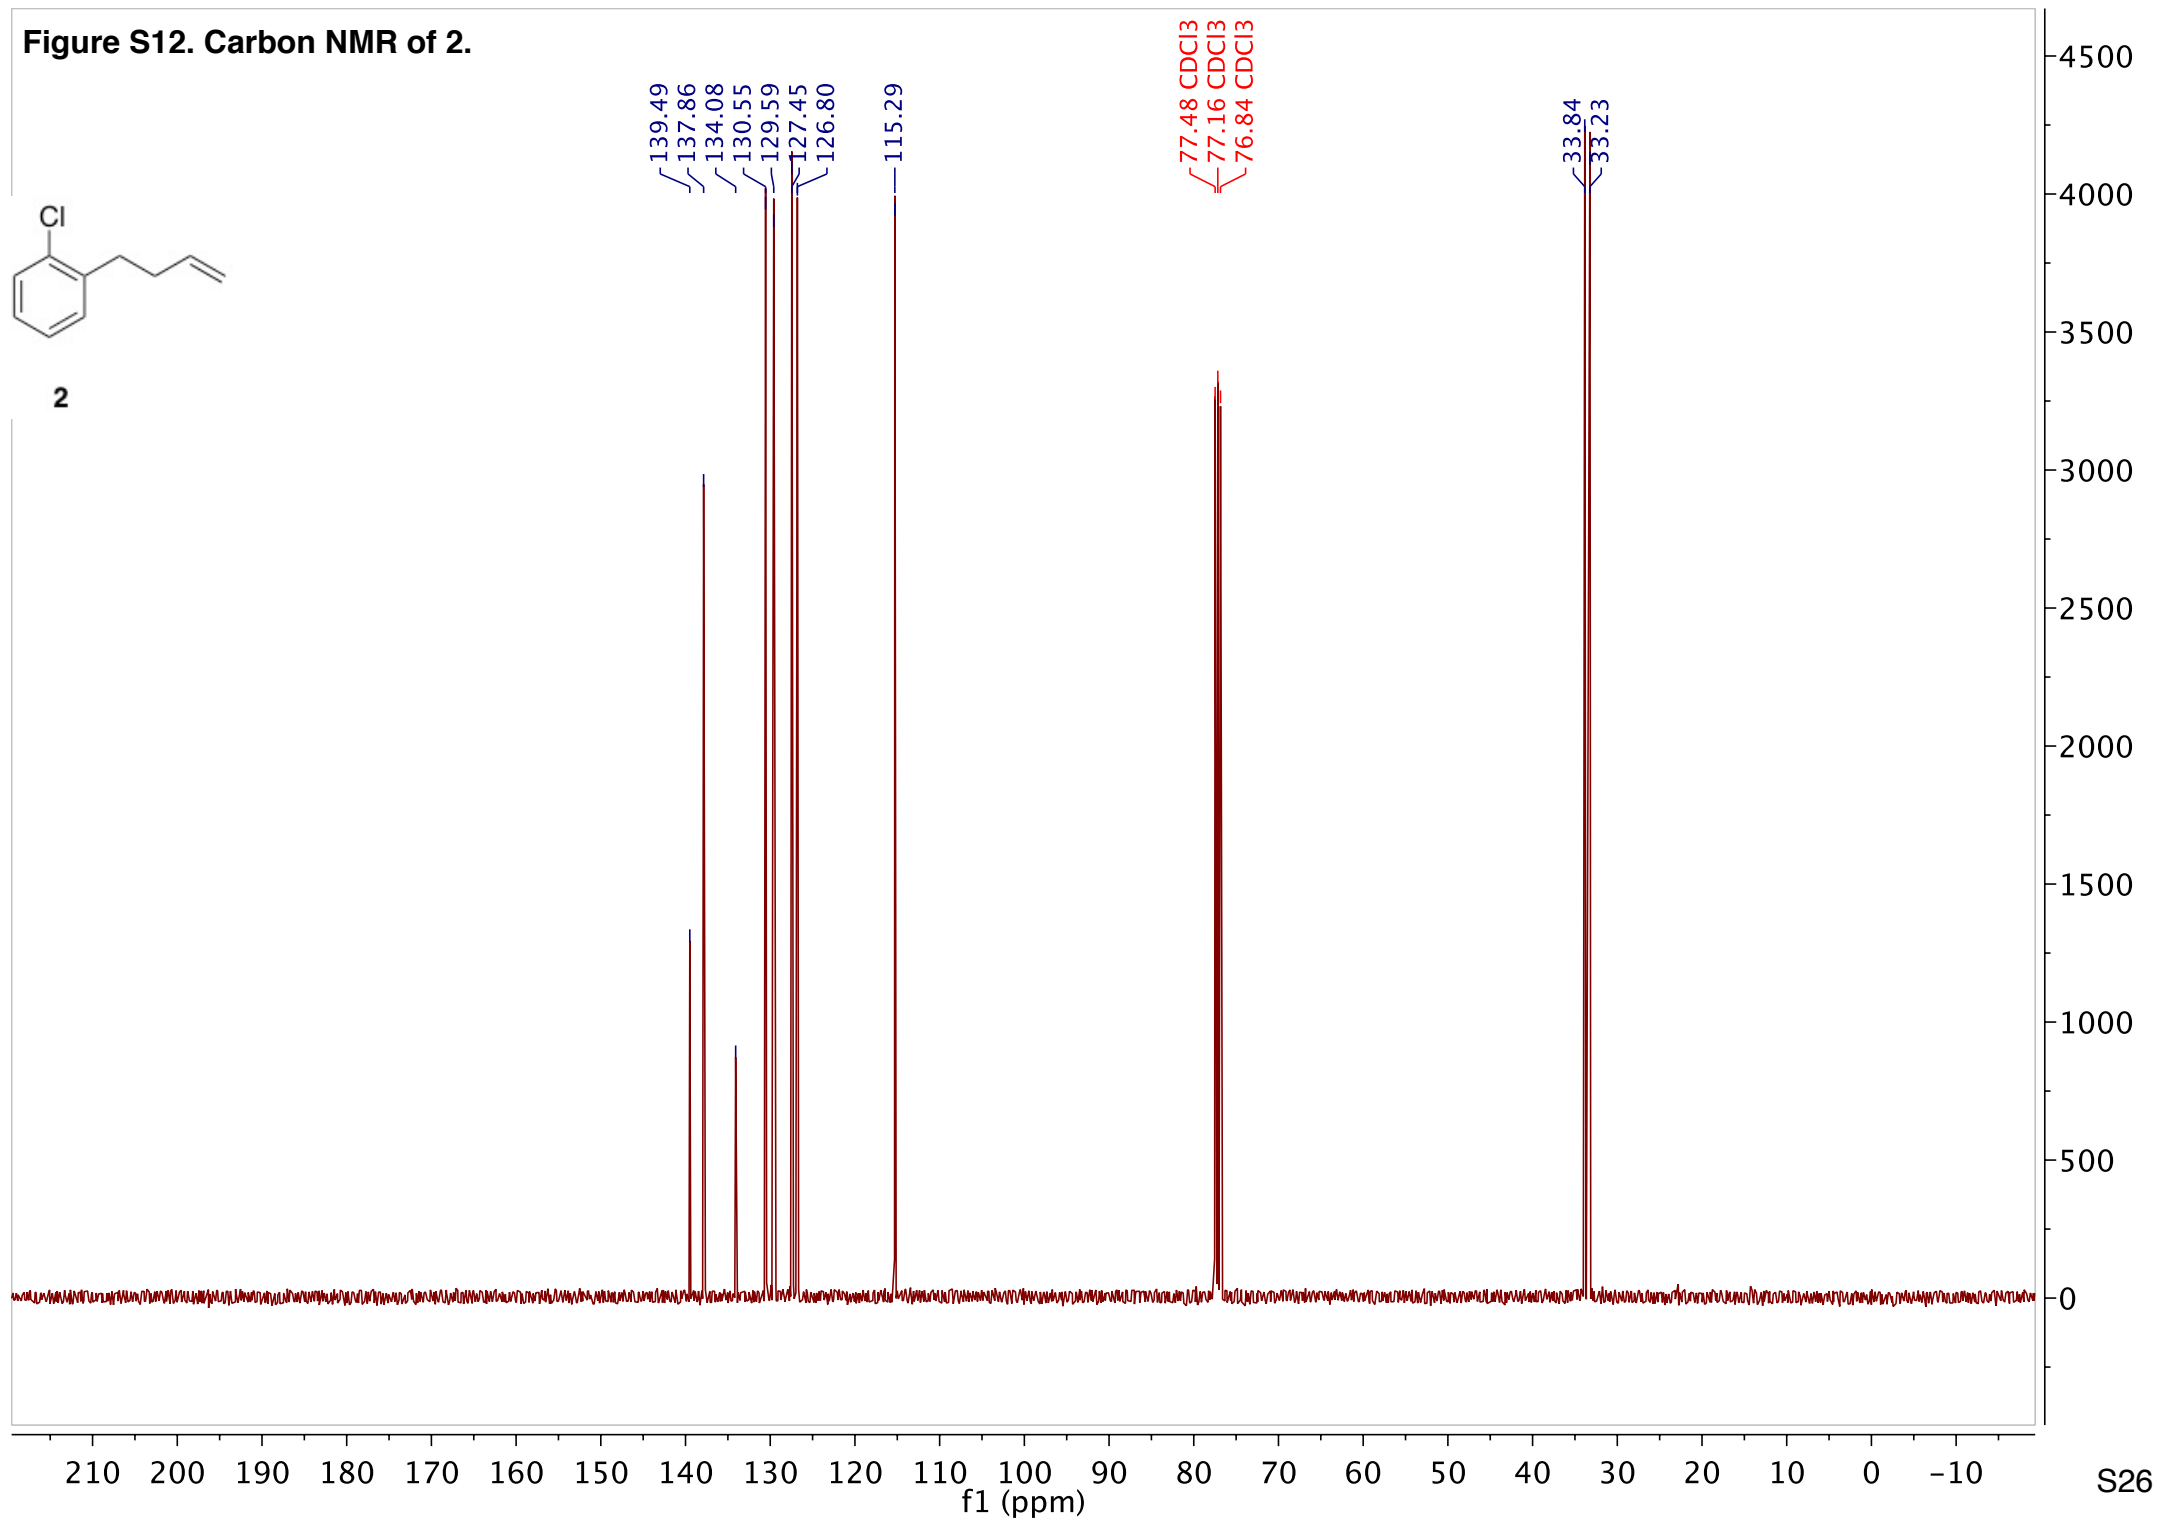

Figure S13. Proton NMR of 3.

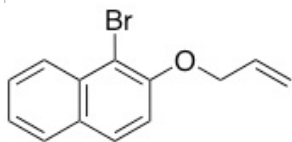

3

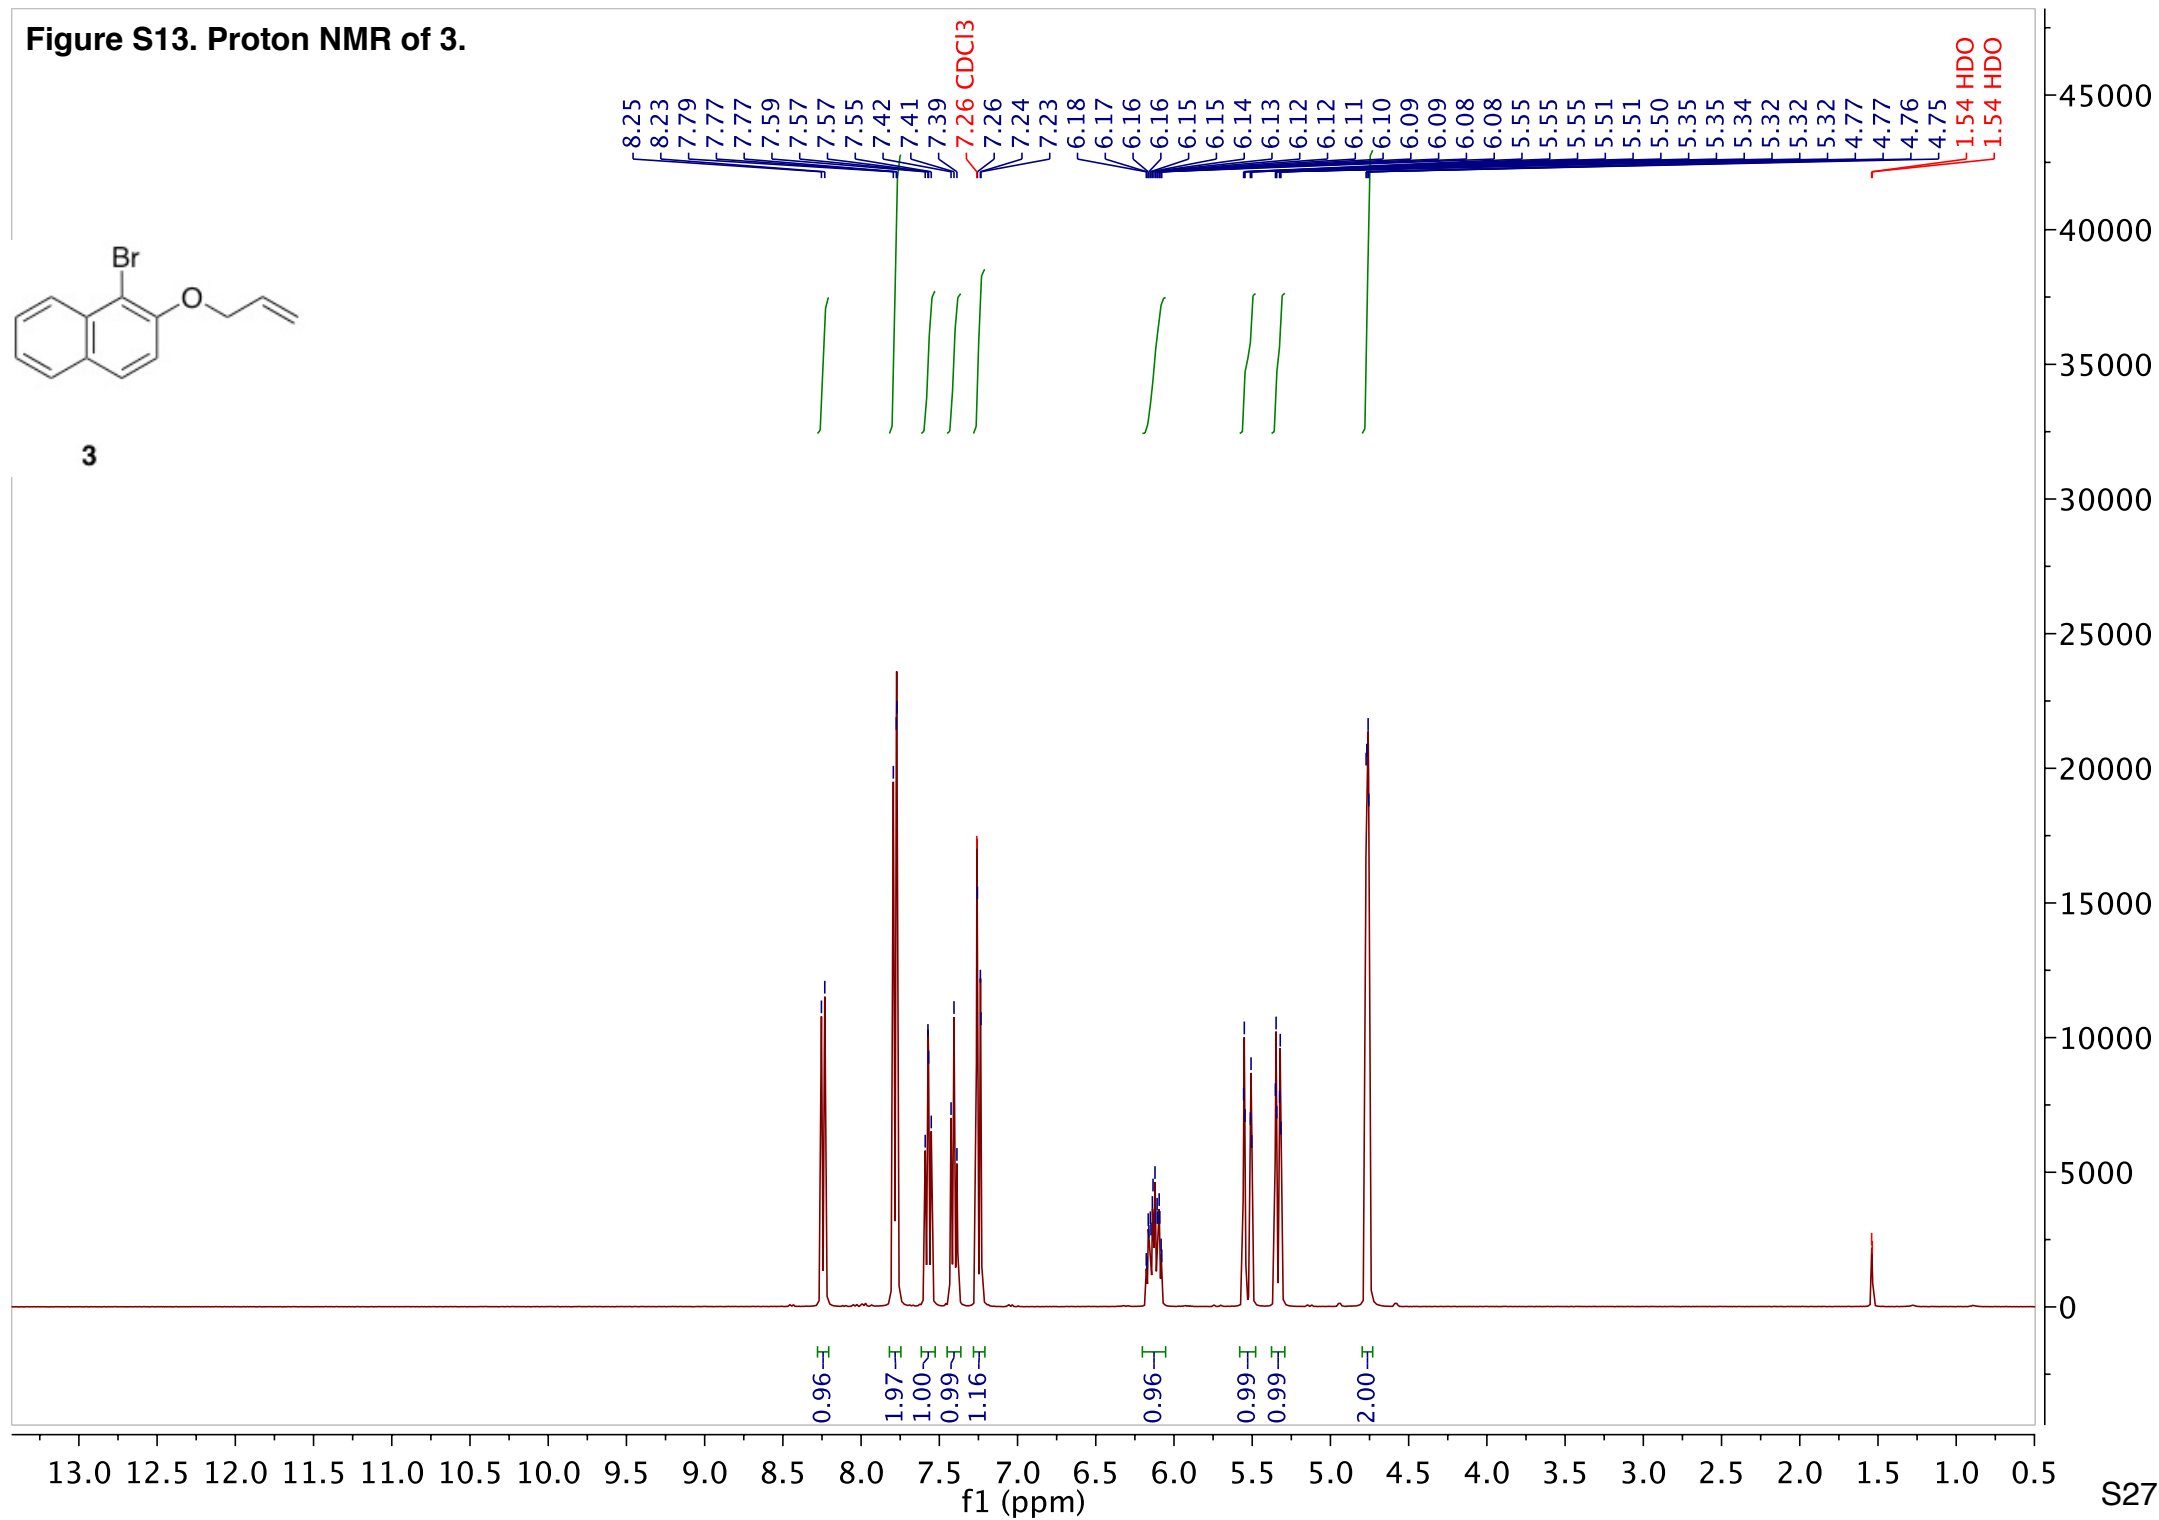

Figure S14. Carbon NMR of 3.

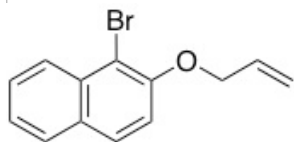

3

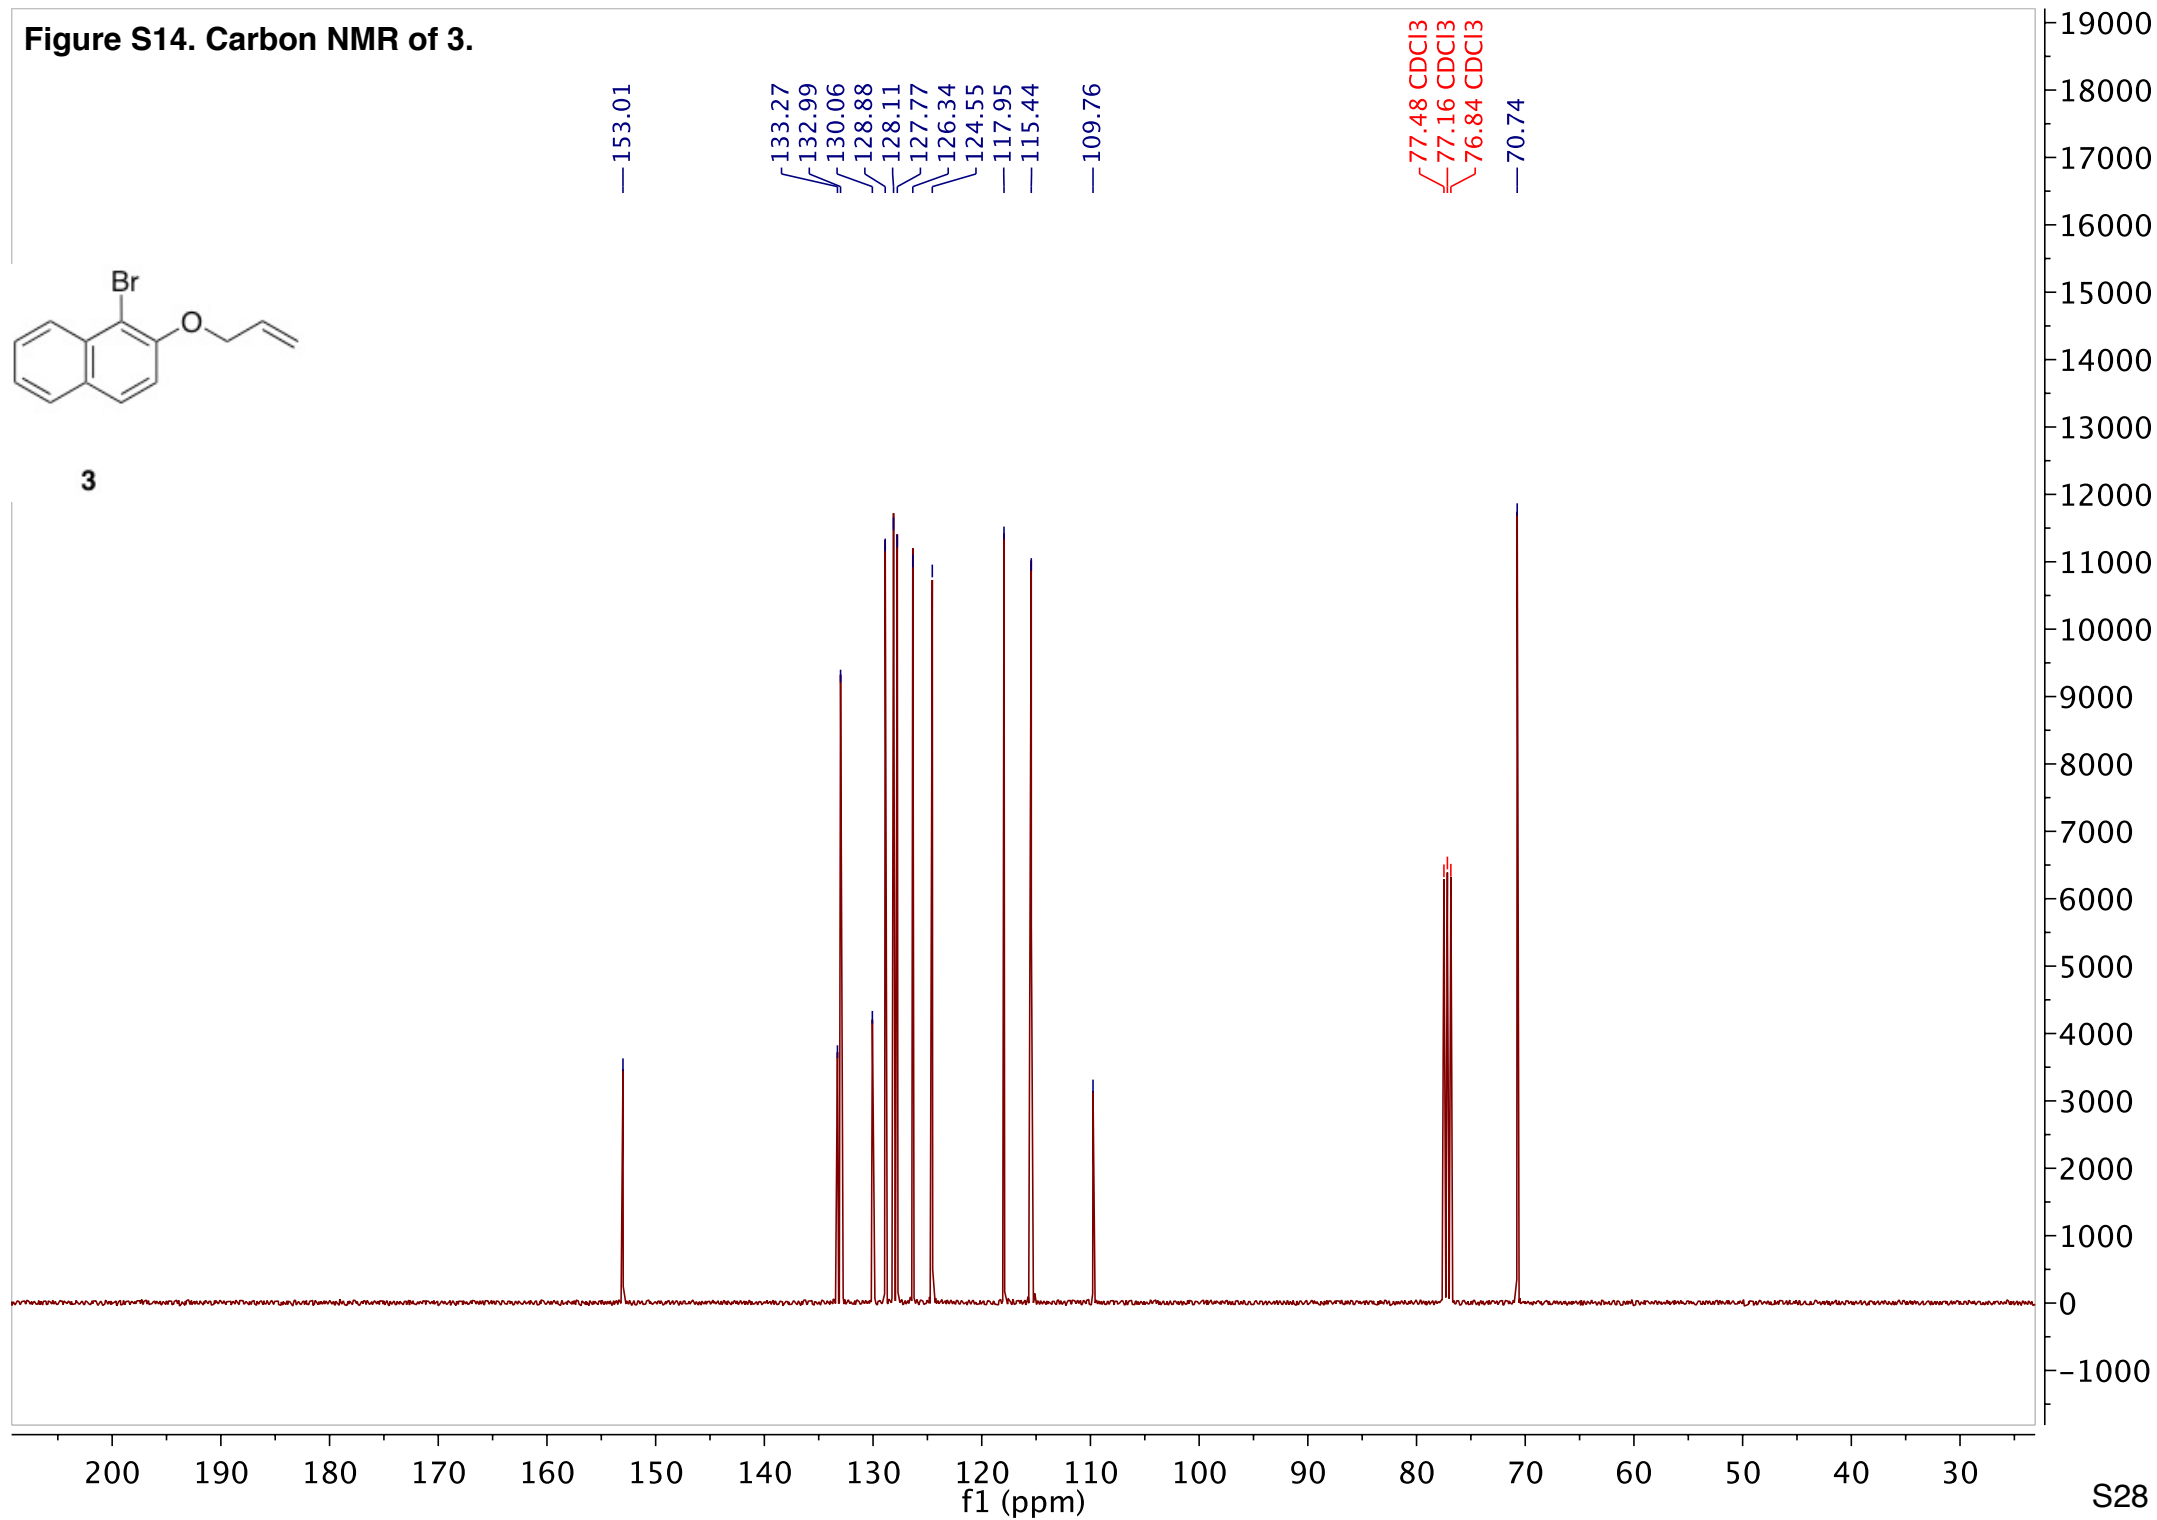



Figure S15. Proton  
NMR of 4.

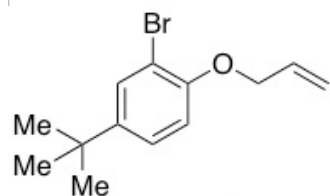

4

7.58  
7.28  
7.26  
7.26 CDCl<sub>3</sub>  
6.87  
6.85  
6.14  
6.14  
6.13  
6.12  
6.11  
6.11  
6.10  
6.10  
6.09  
6.08  
6.07  
6.07  
6.06  
6.05  
6.05  
6.04  
5.52  
5.48  
5.34  
5.31  
4.63  
4.61

1.56 HDO  
1.33  
1.32  
1.31

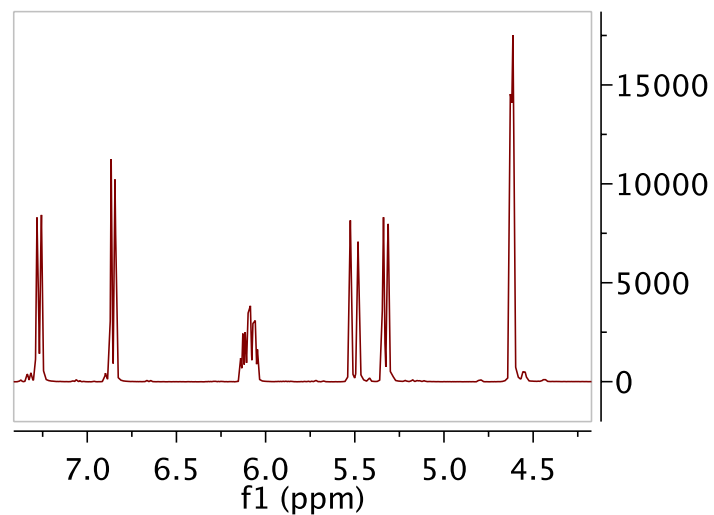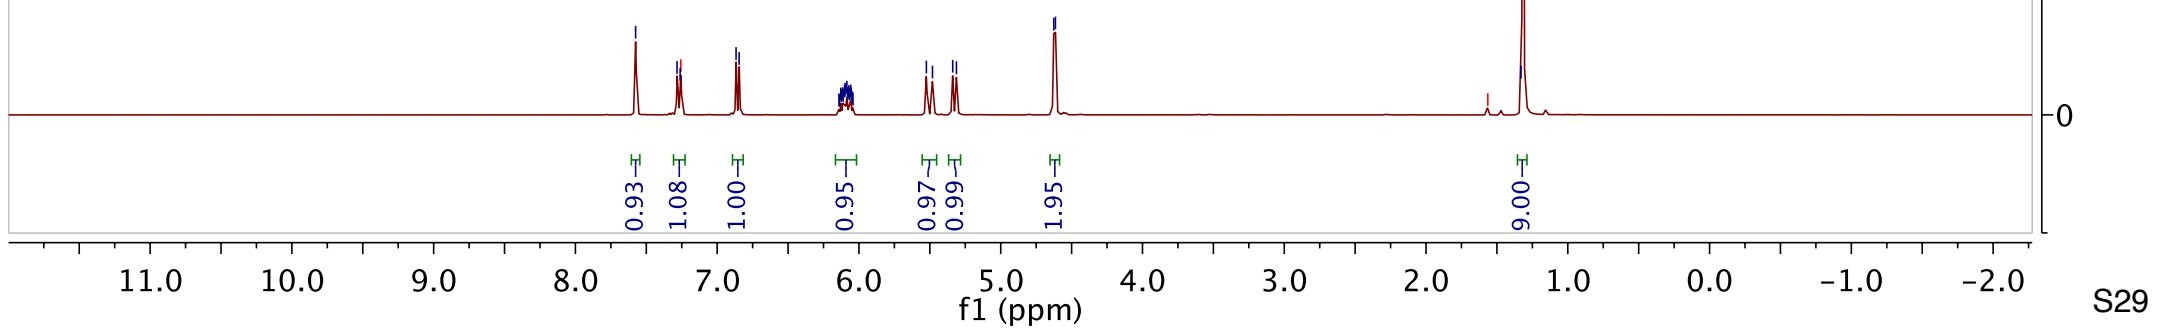

Figure S16. Carbon NMR of 4.

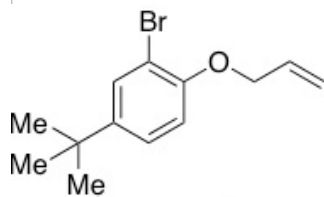

4

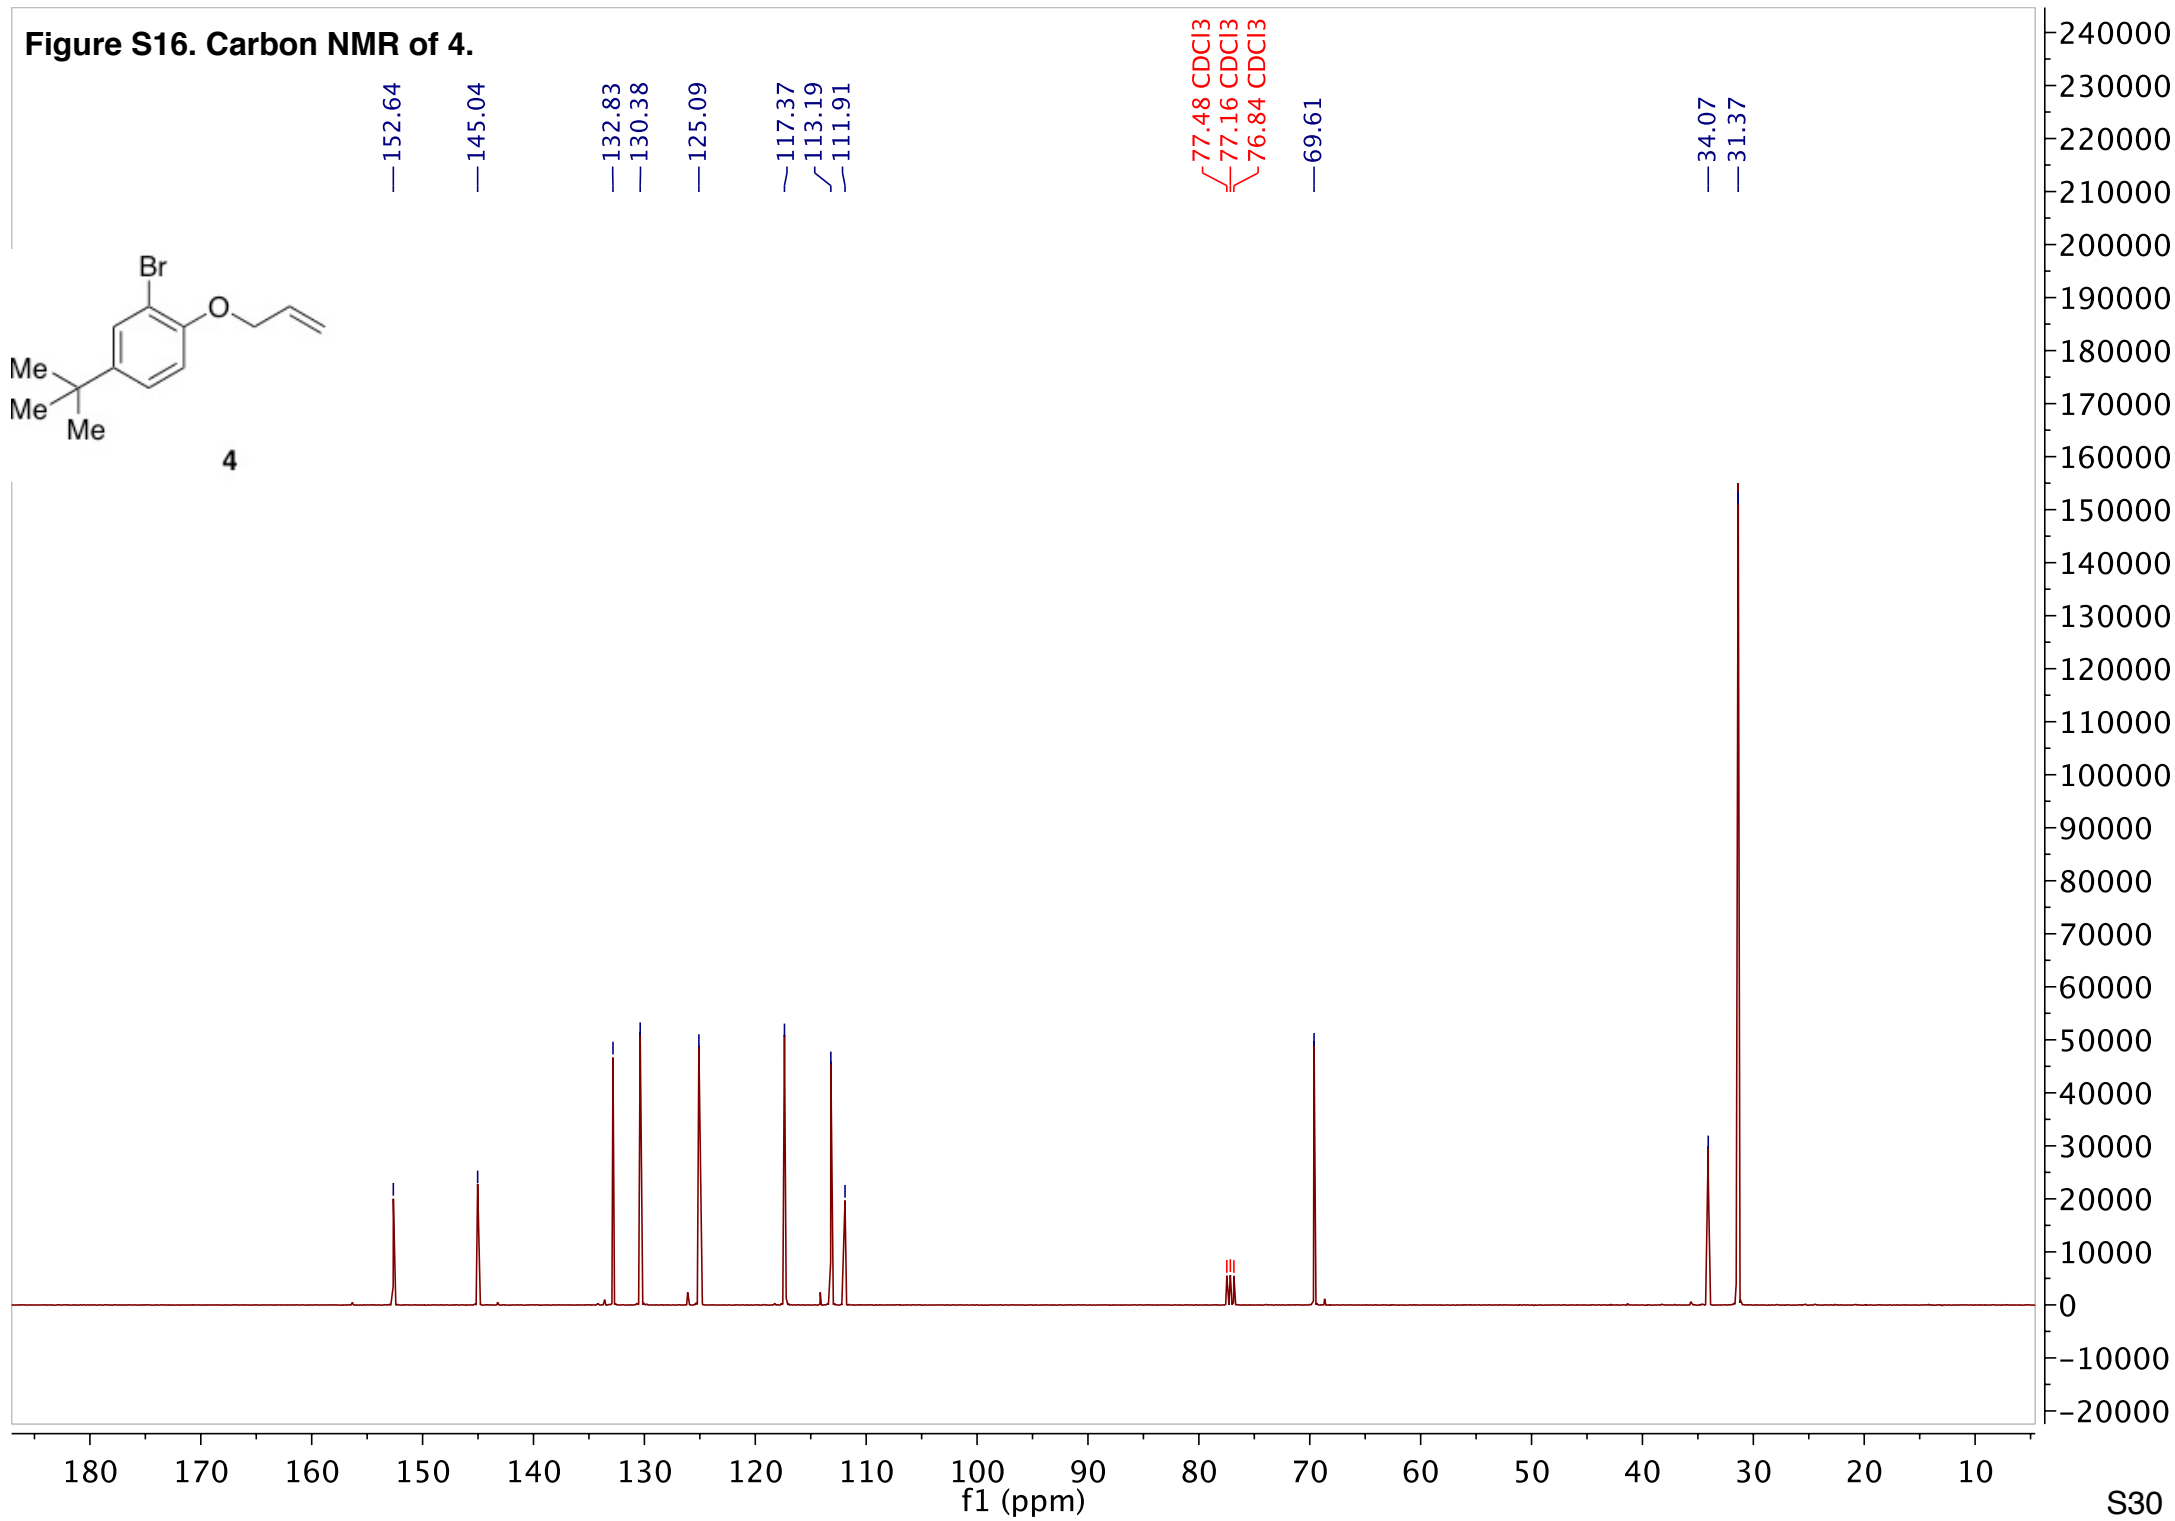

S30

Figure S17. Proton NMR of 5.

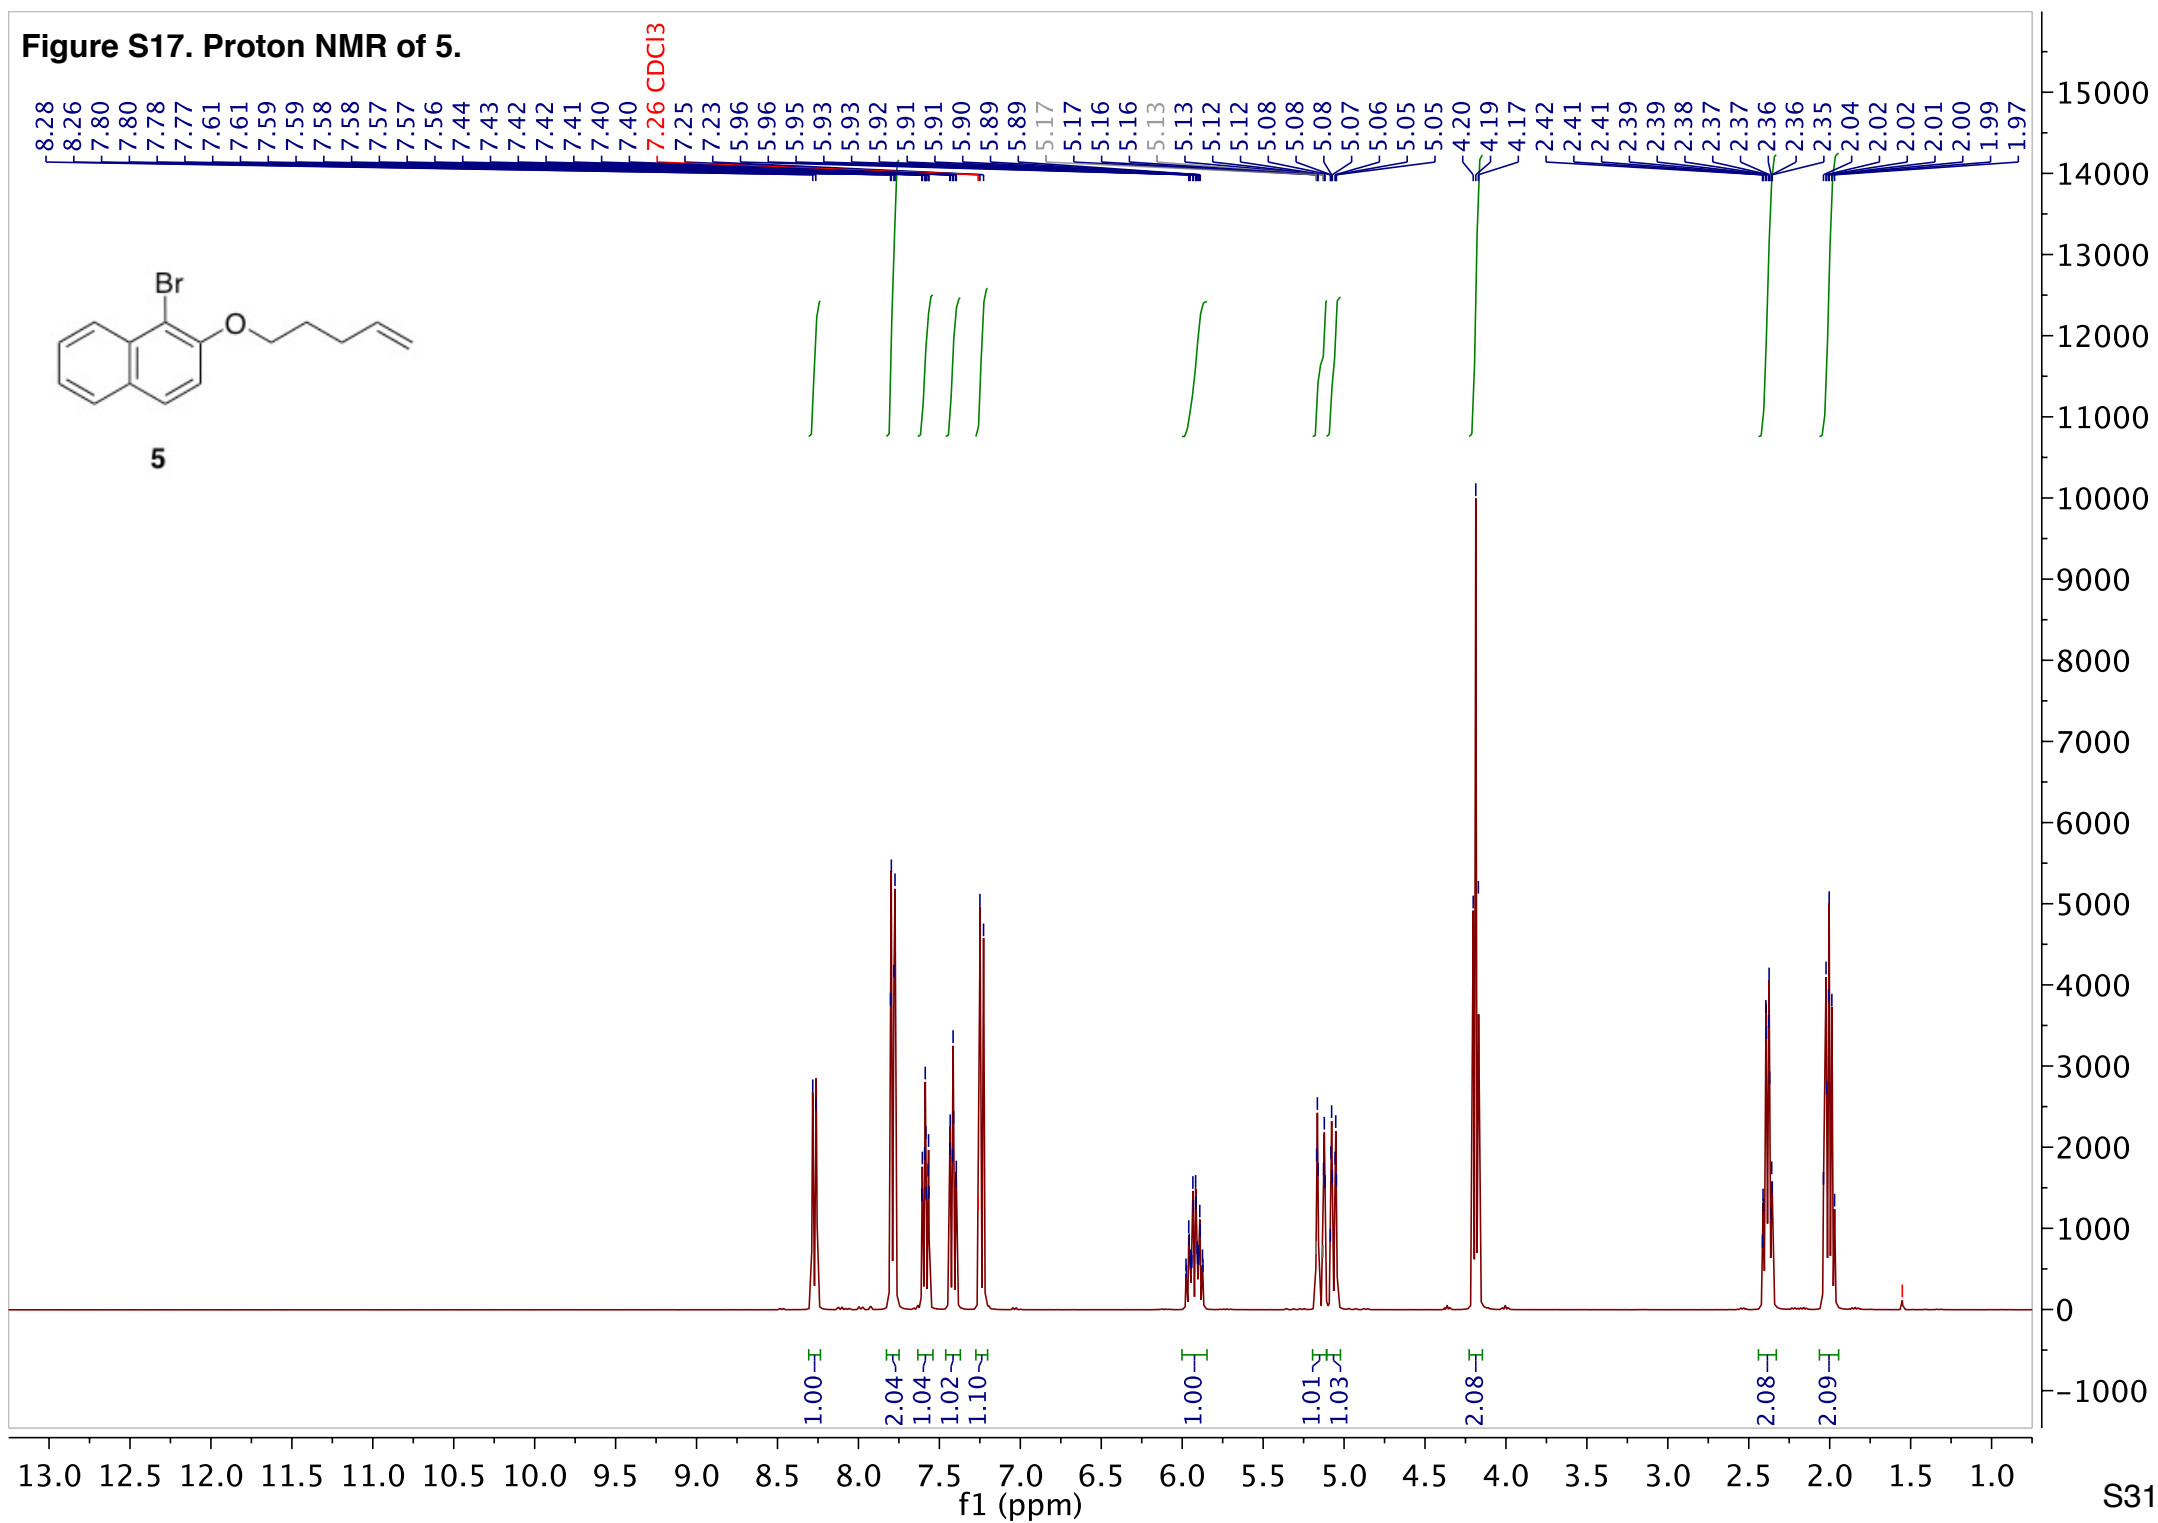

Figure S18. Carbon NMR of 5.

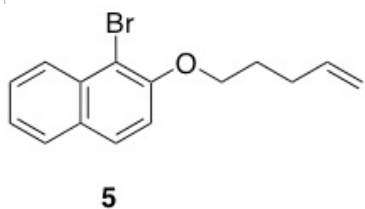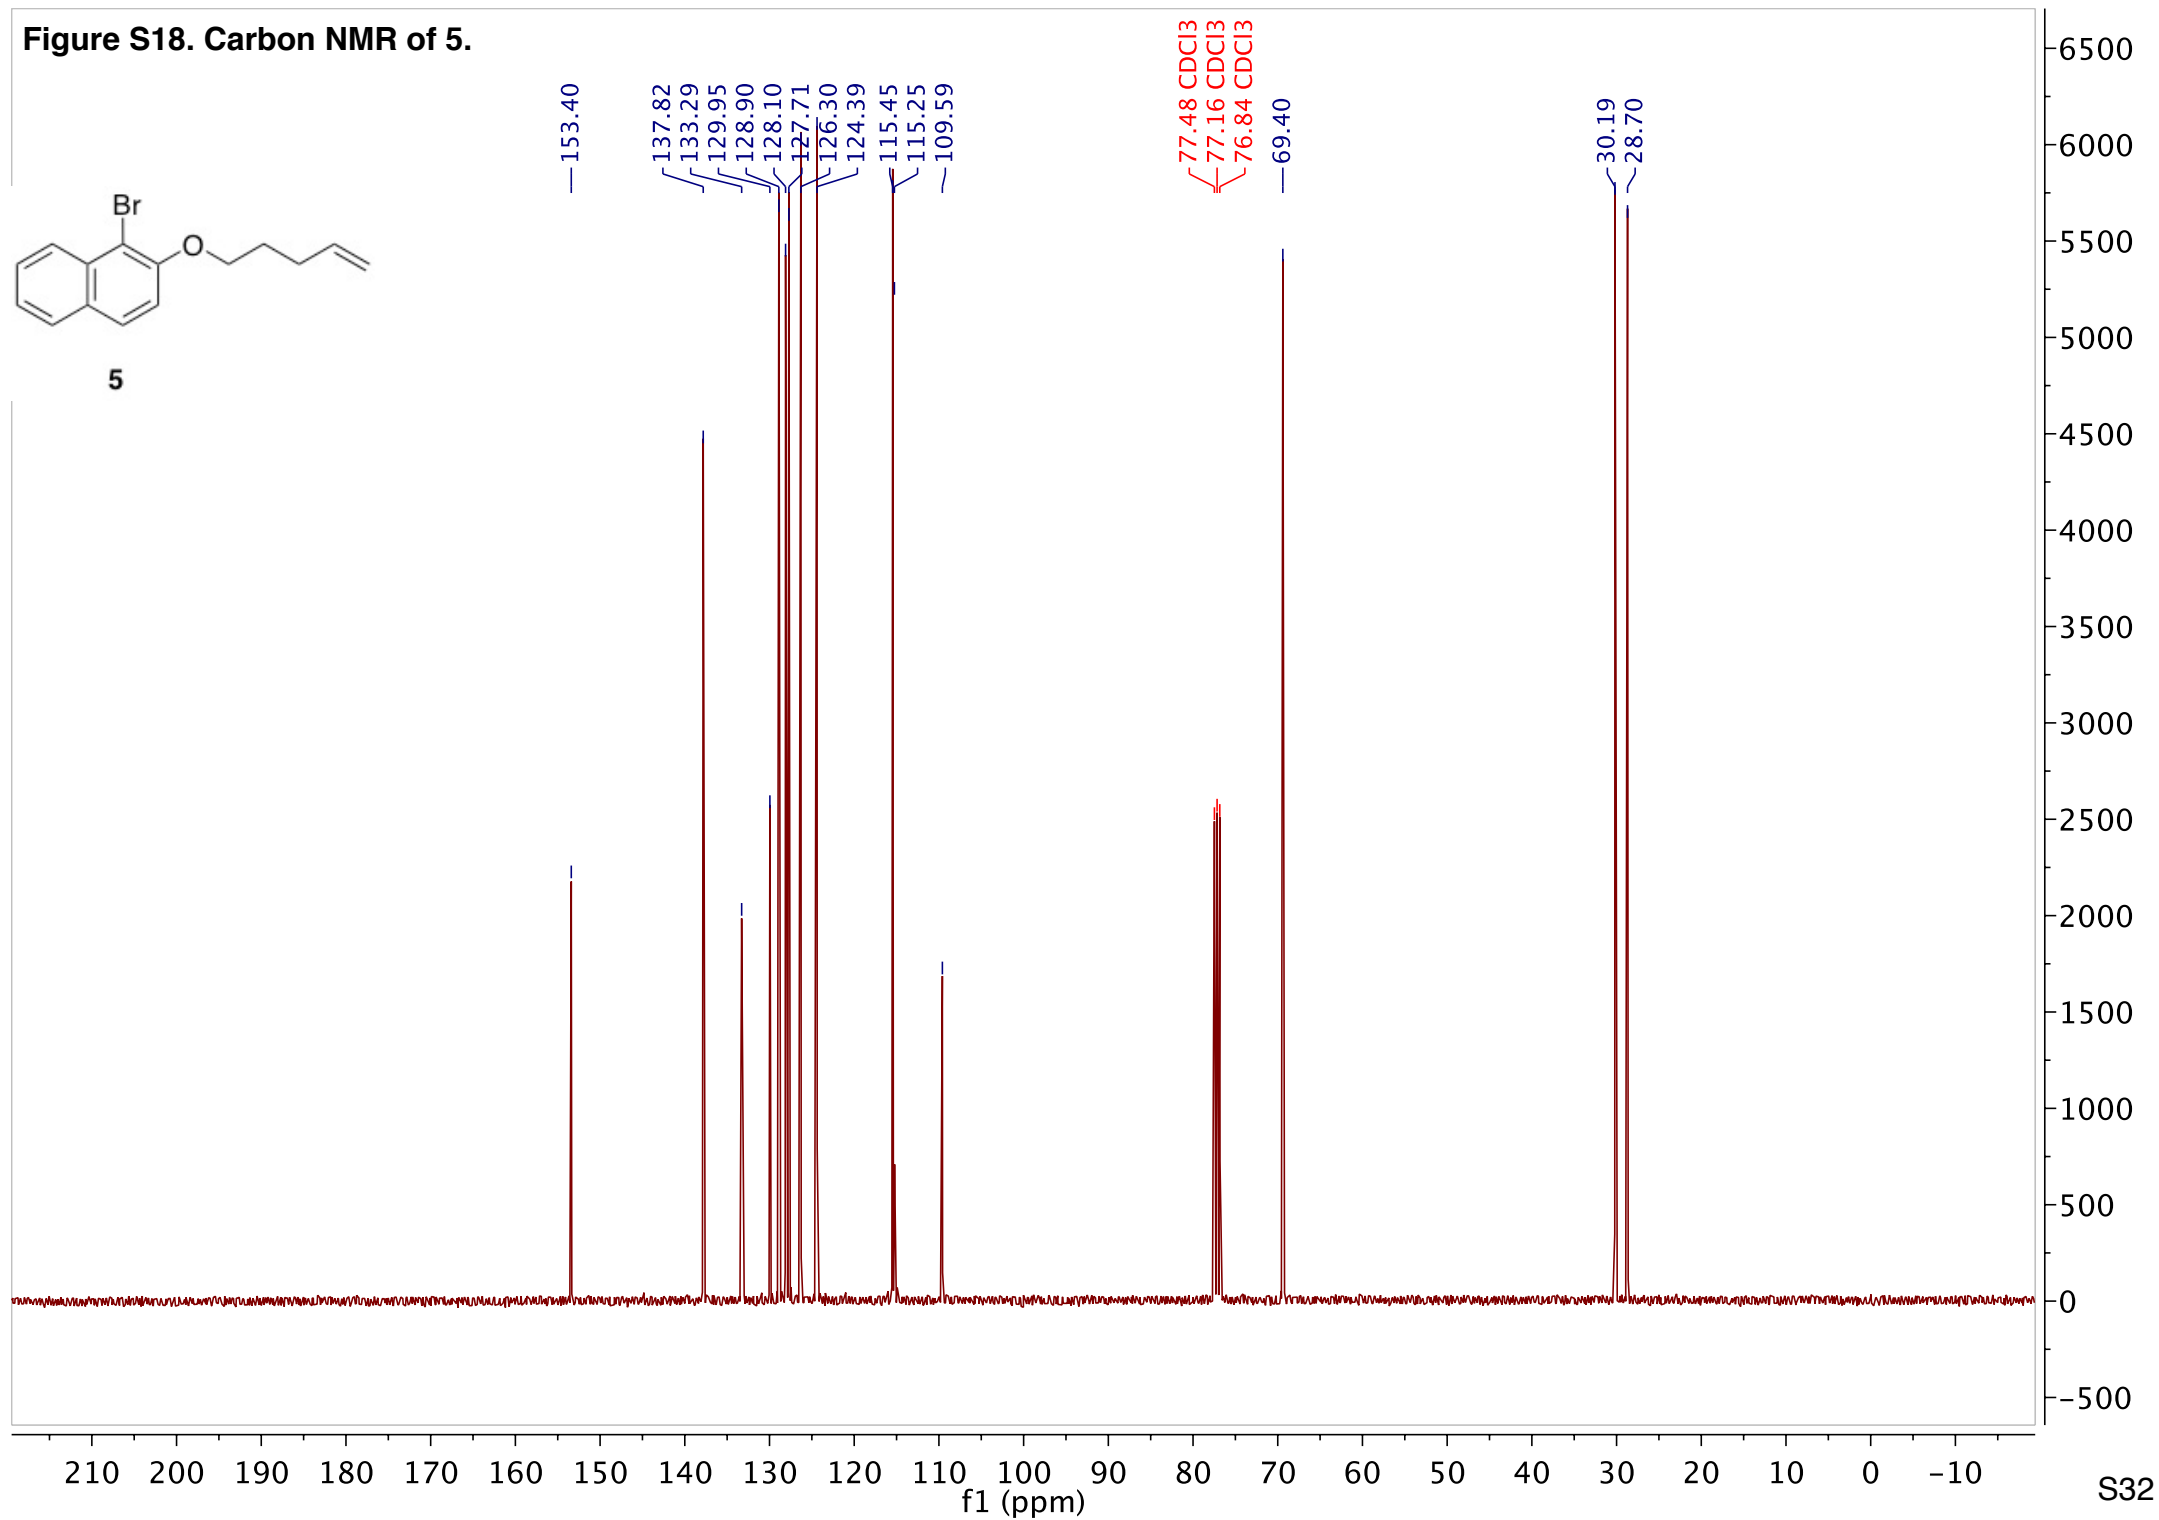

**Figure S19. Proton NMR of 1-chloro-2-(pent-4-en-1-yloxy)naphthalene.**

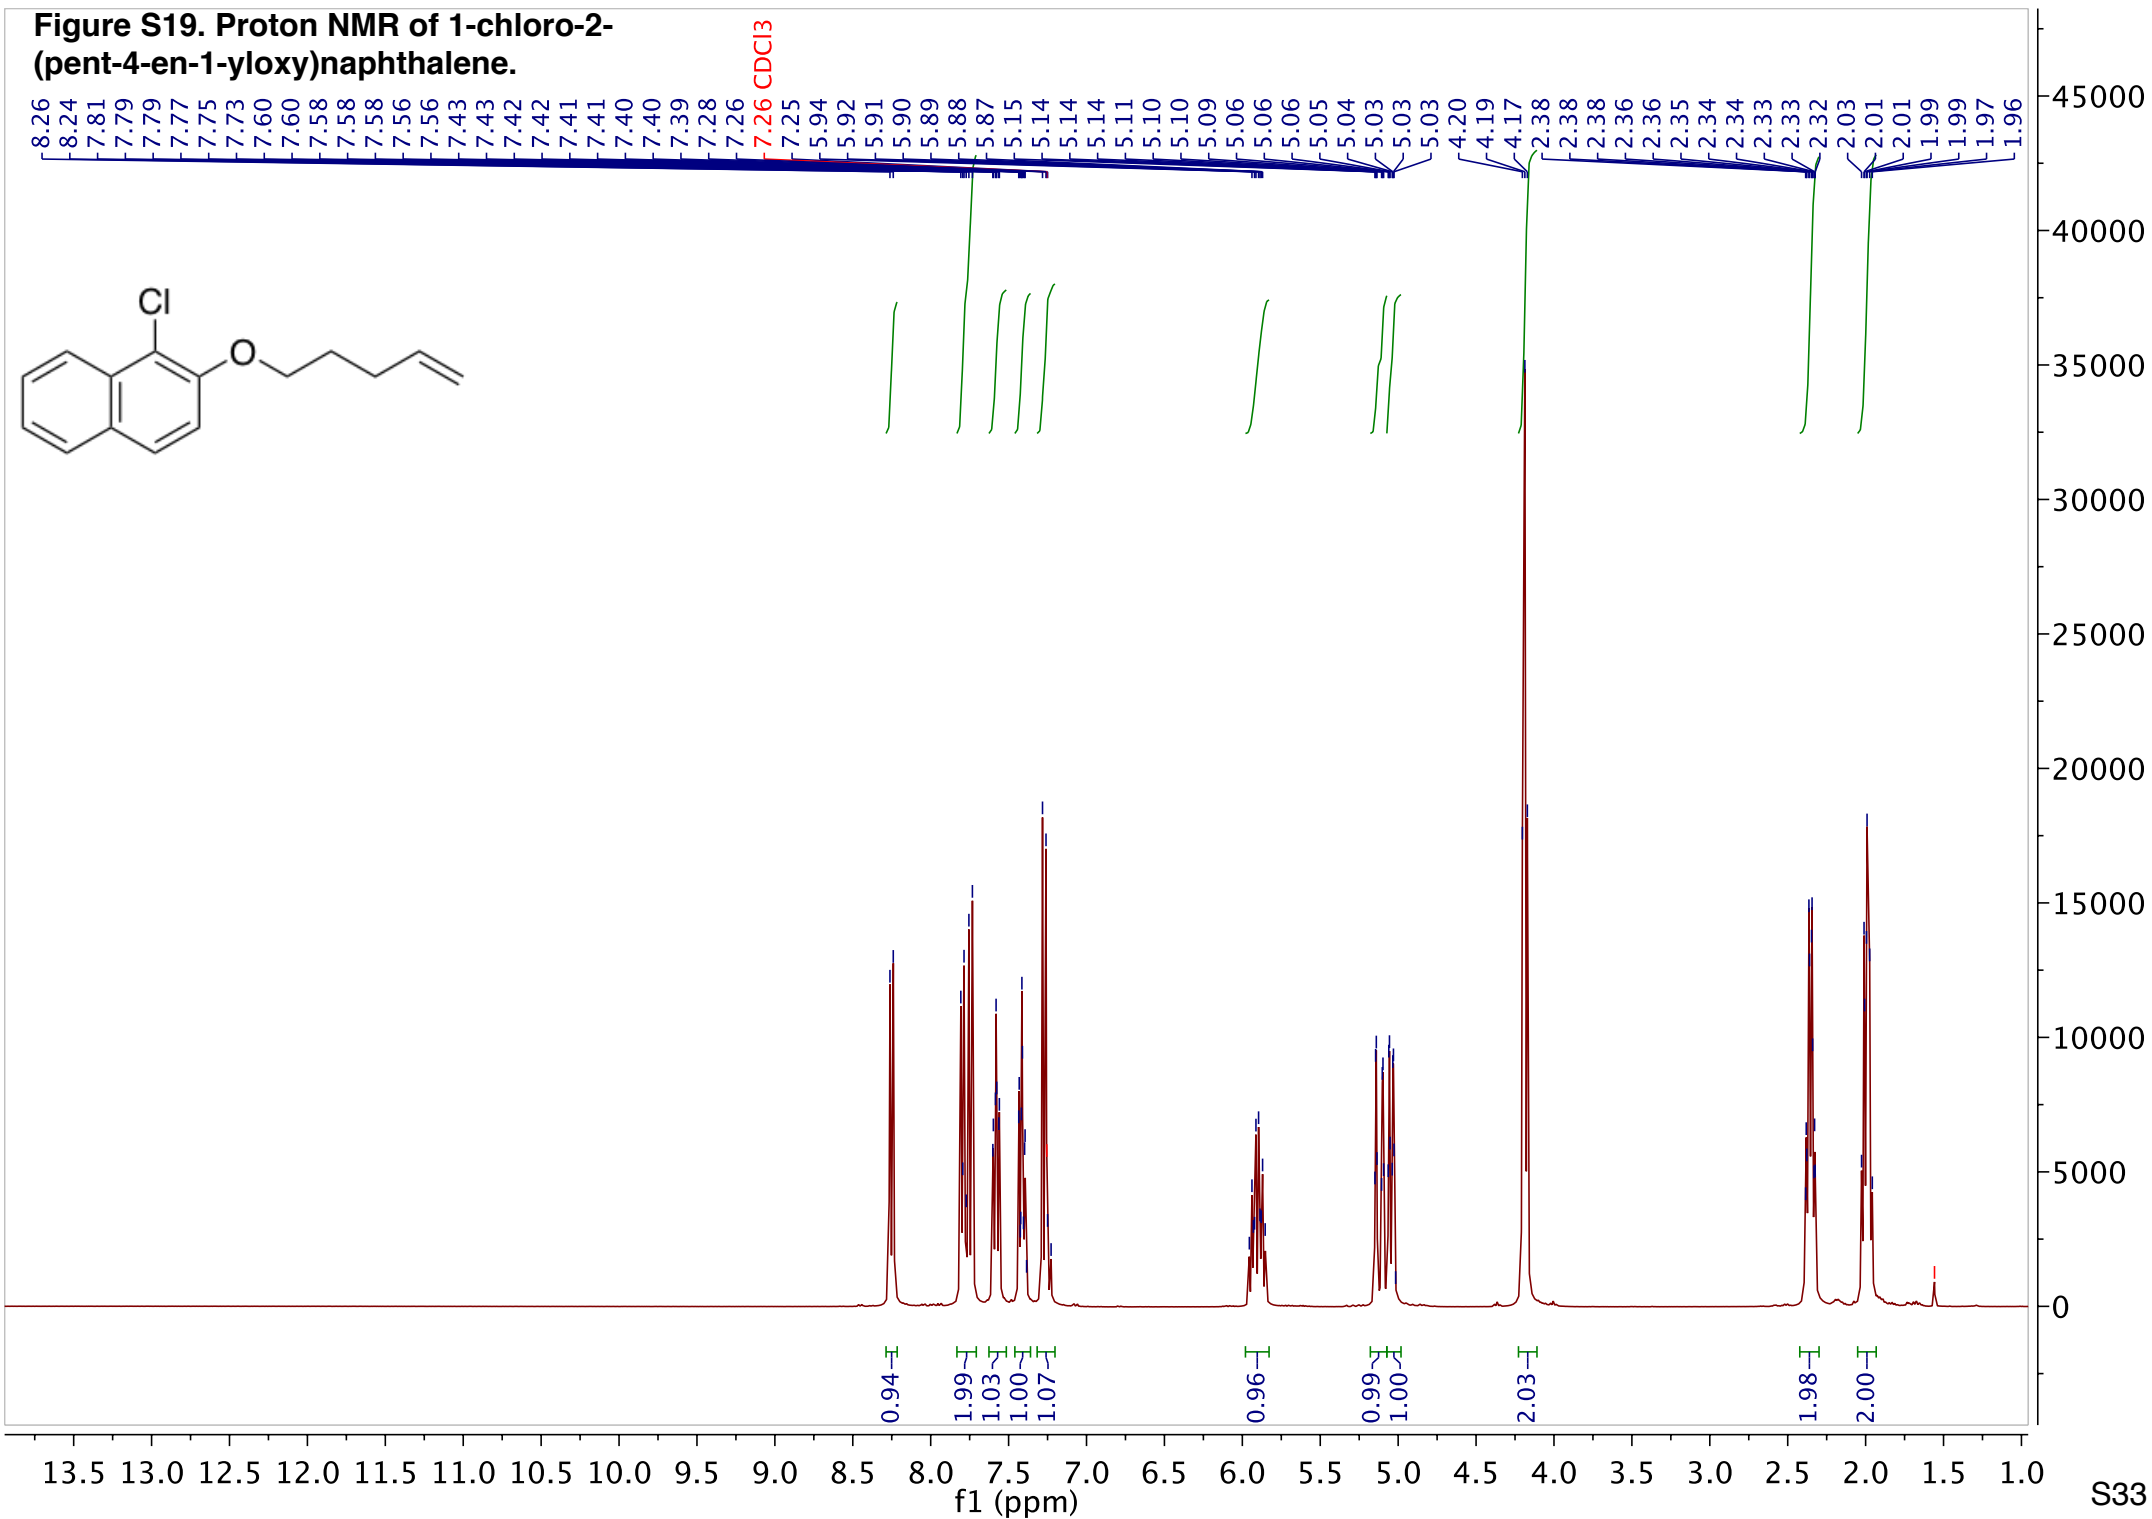

**Figure S20. Carbon  
NMR of 1-chloro-2-  
(pent-4-en-1-  
yloxy)naphthalene.**

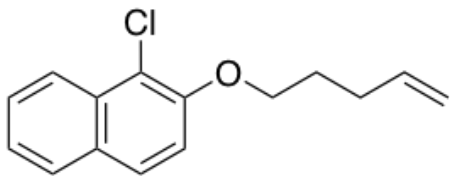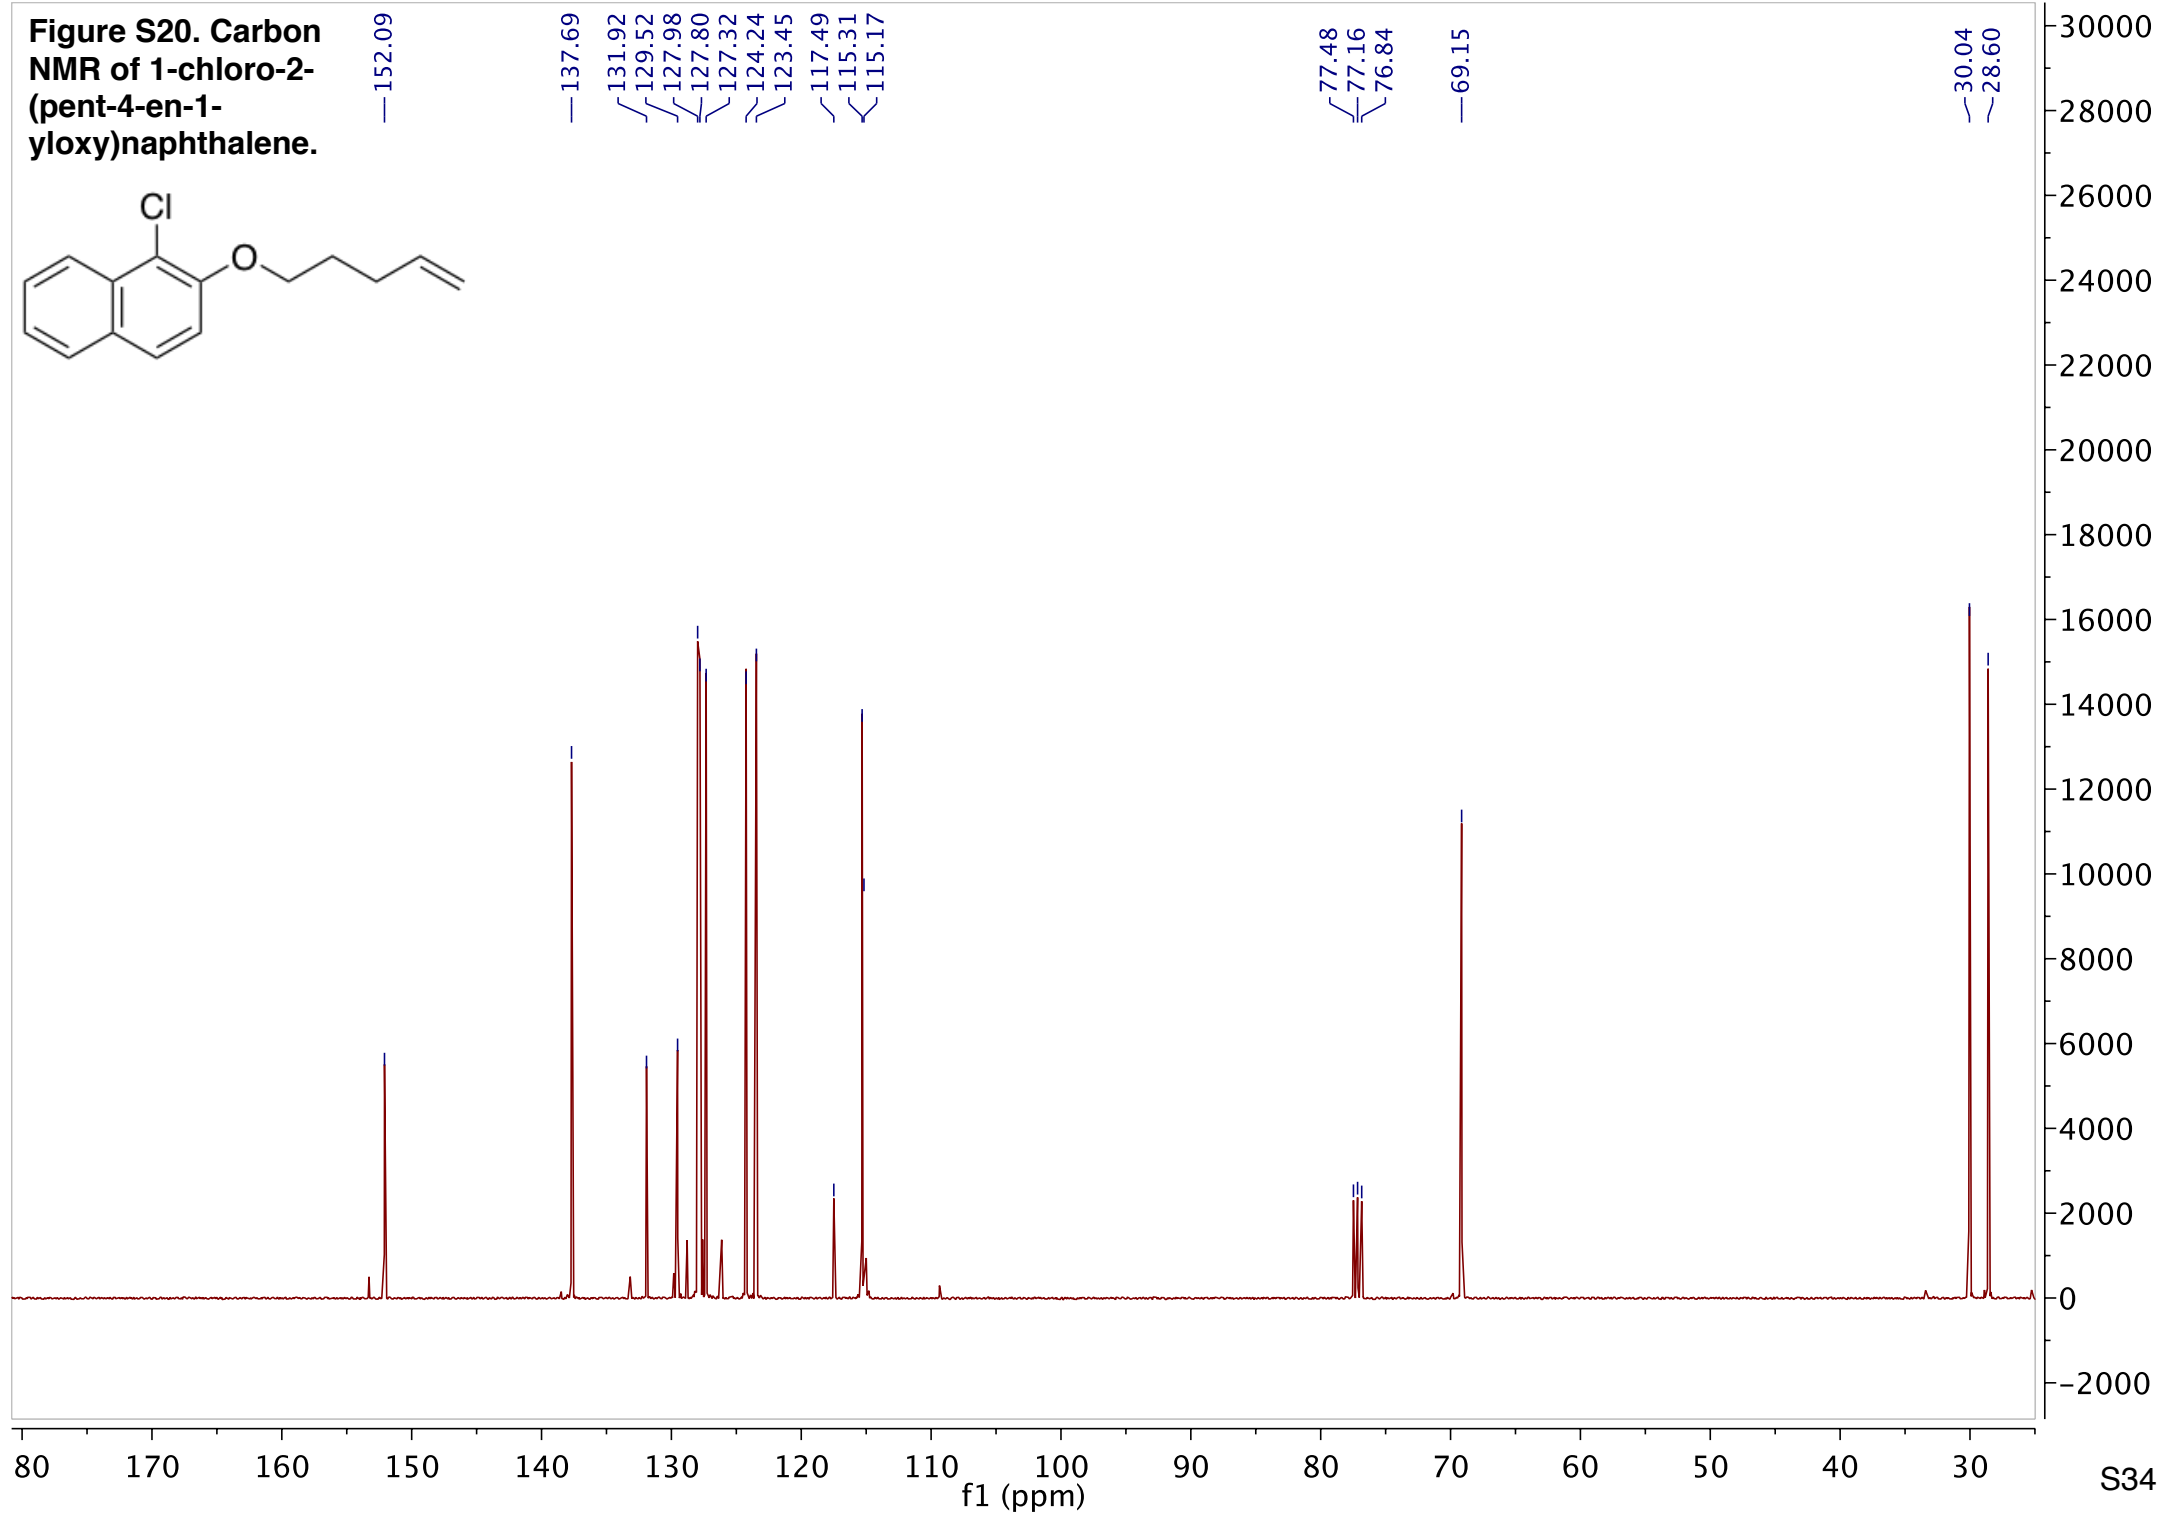

Figure S21. Proton  
NMR of 6.

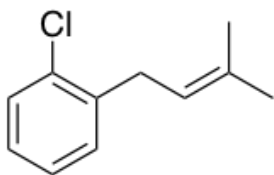

6

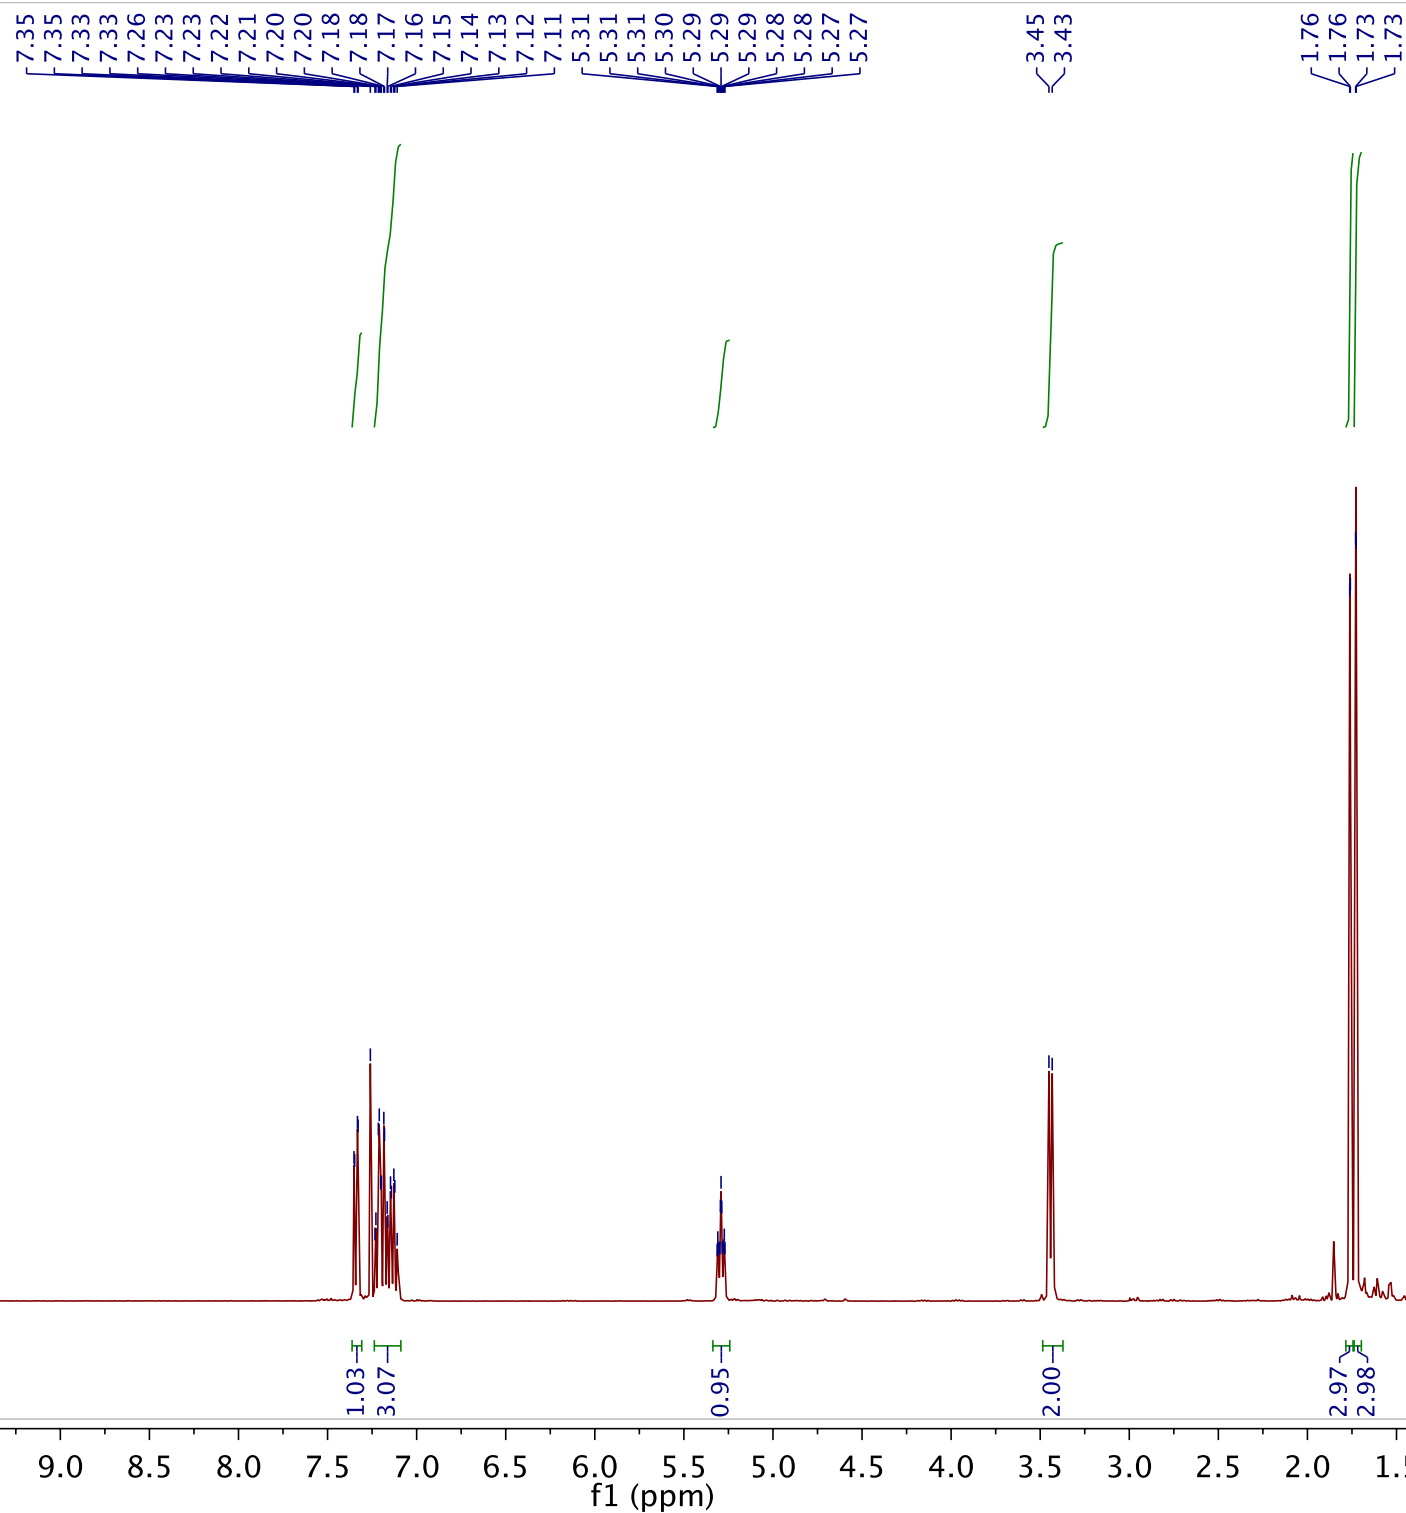

**Figure S22. Carbon NMR  
of 6.**

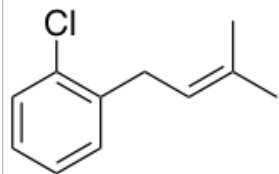

**6**

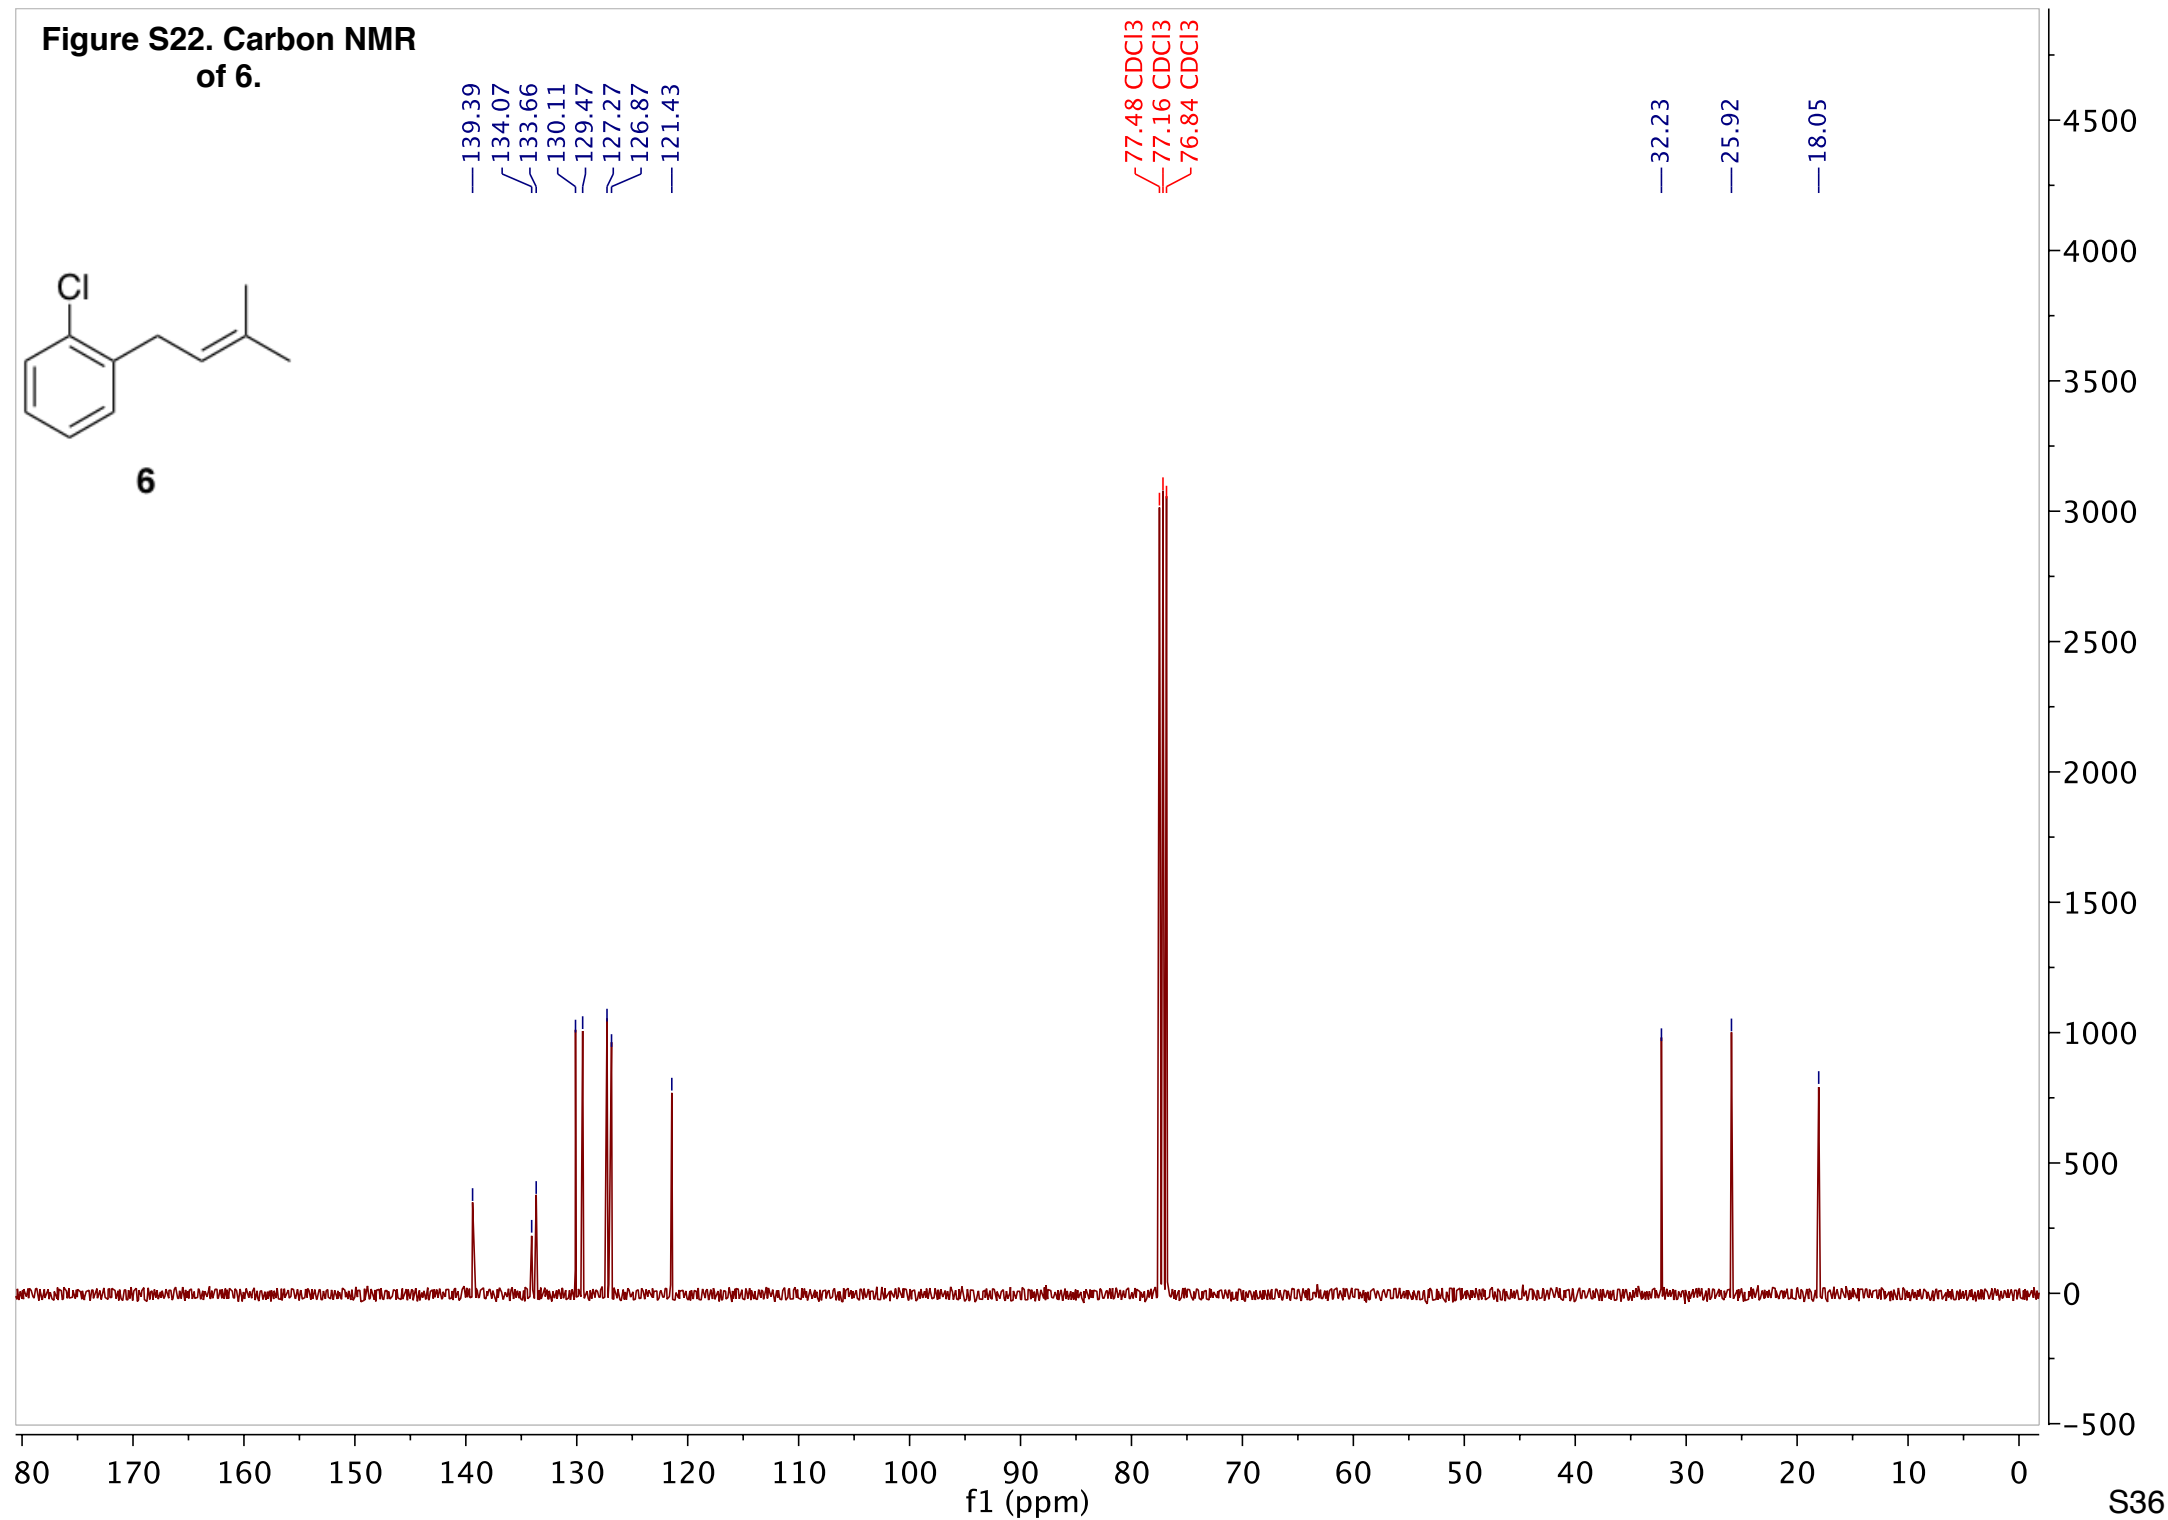



Figure S23. Proton NMR of Ni-2.

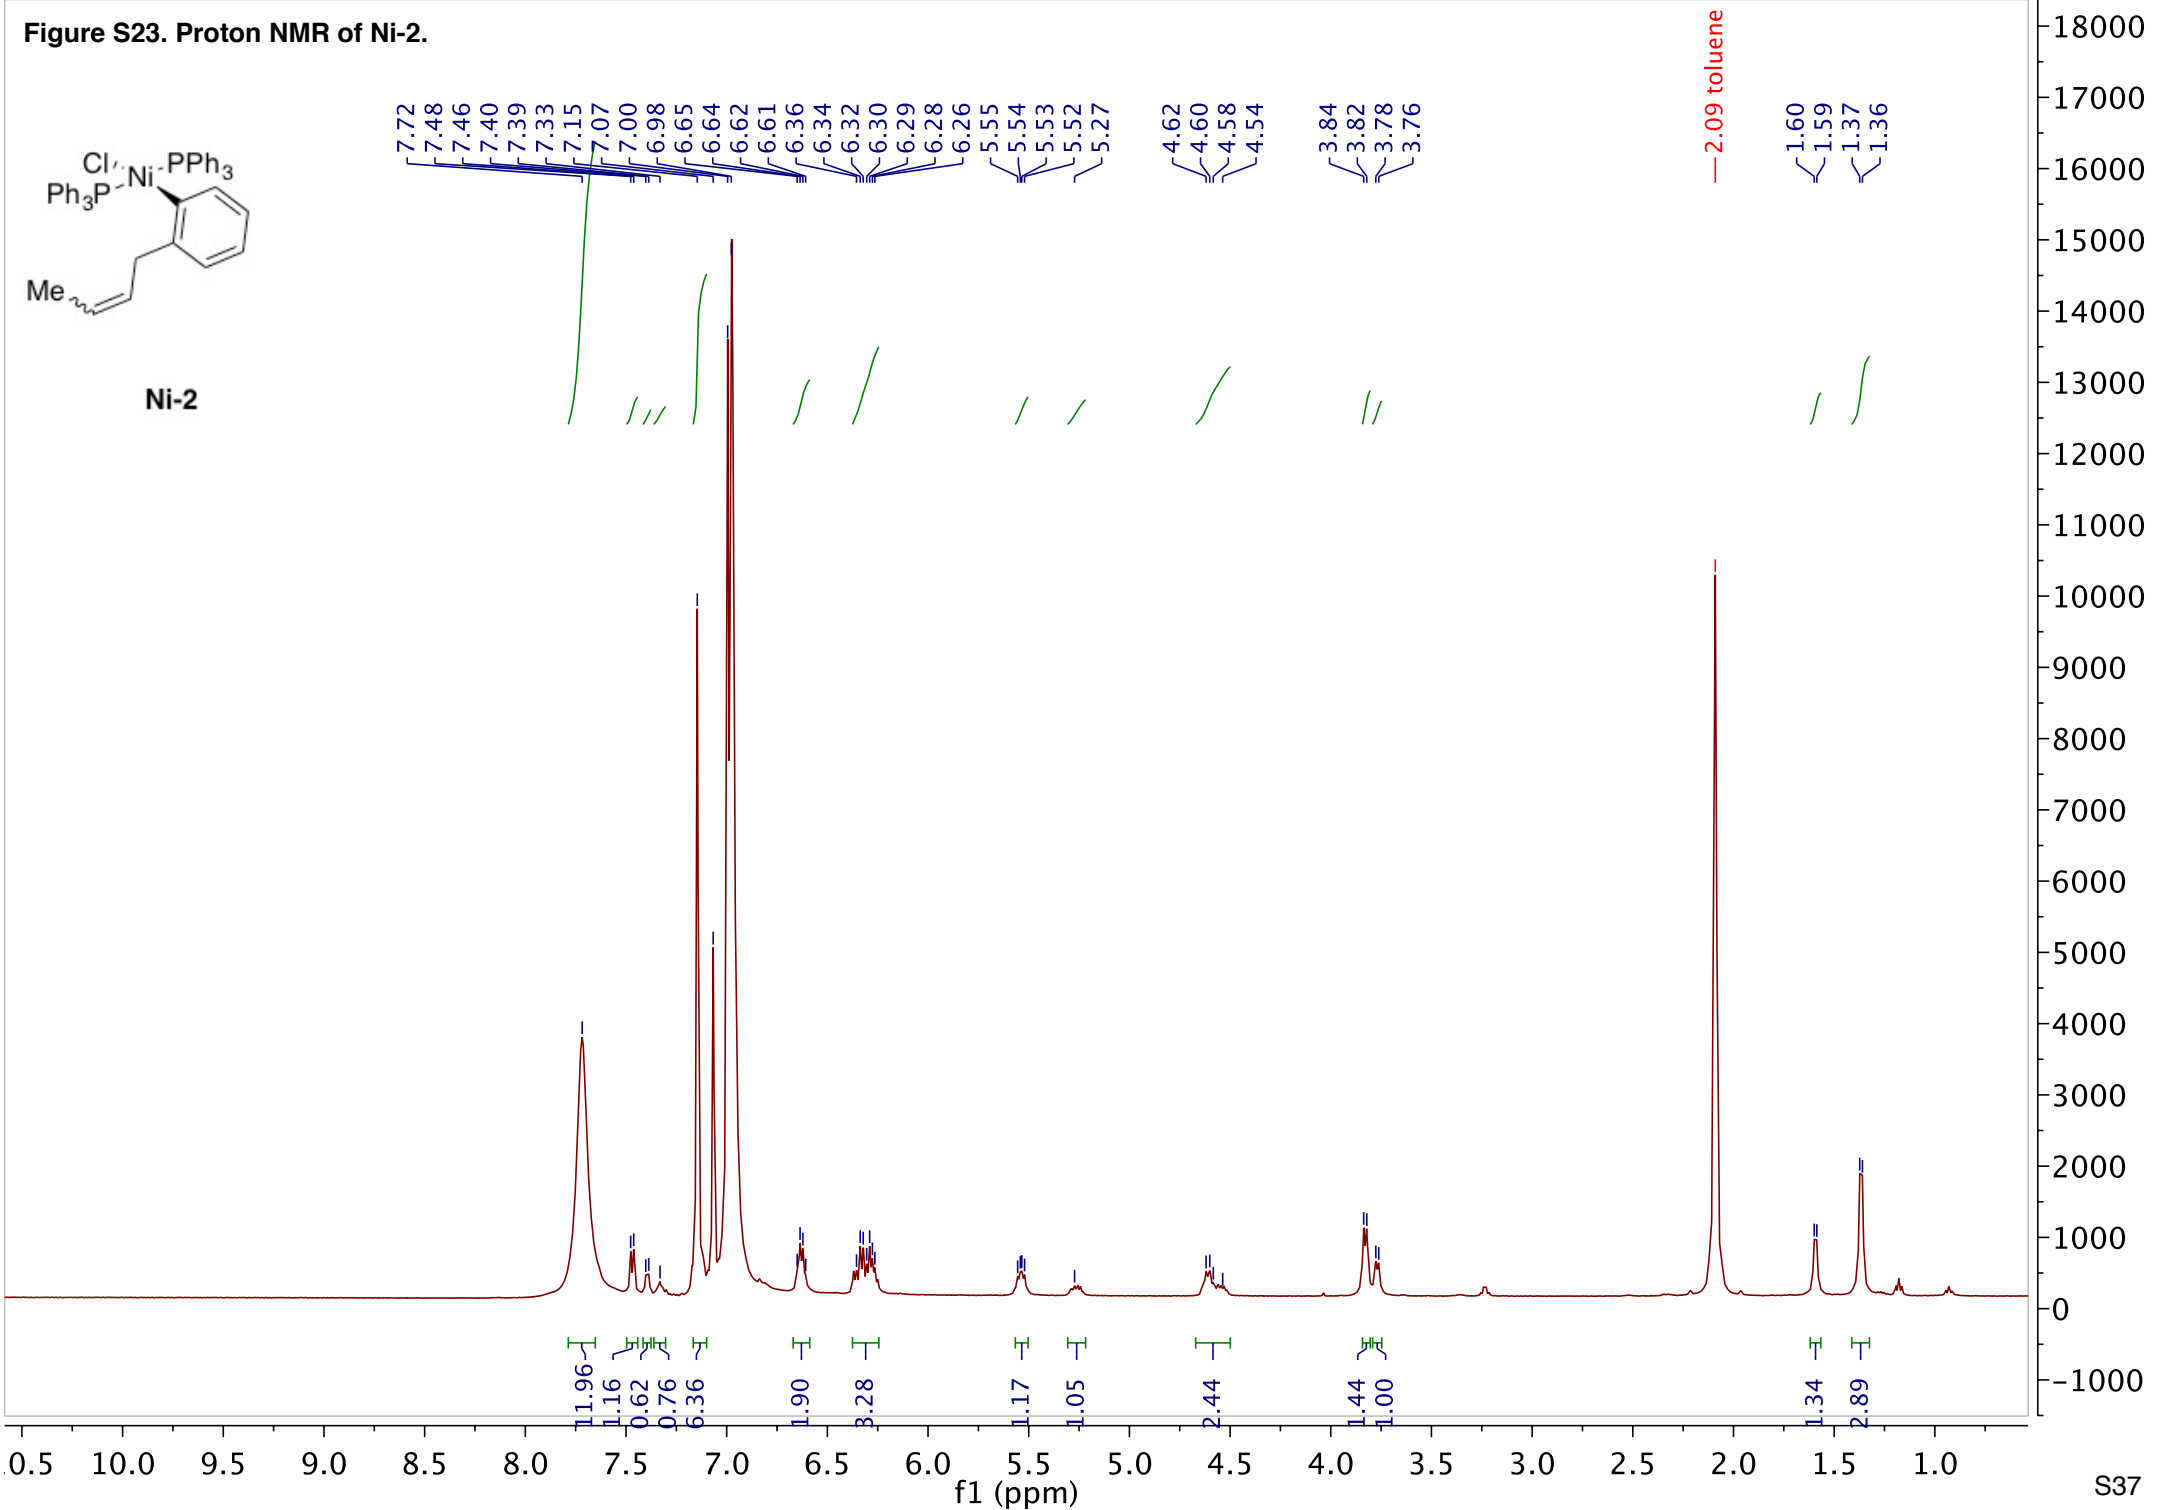

Figure S24. Carbon NMR of Ni-2.

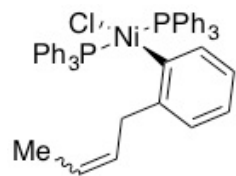

Ni-2

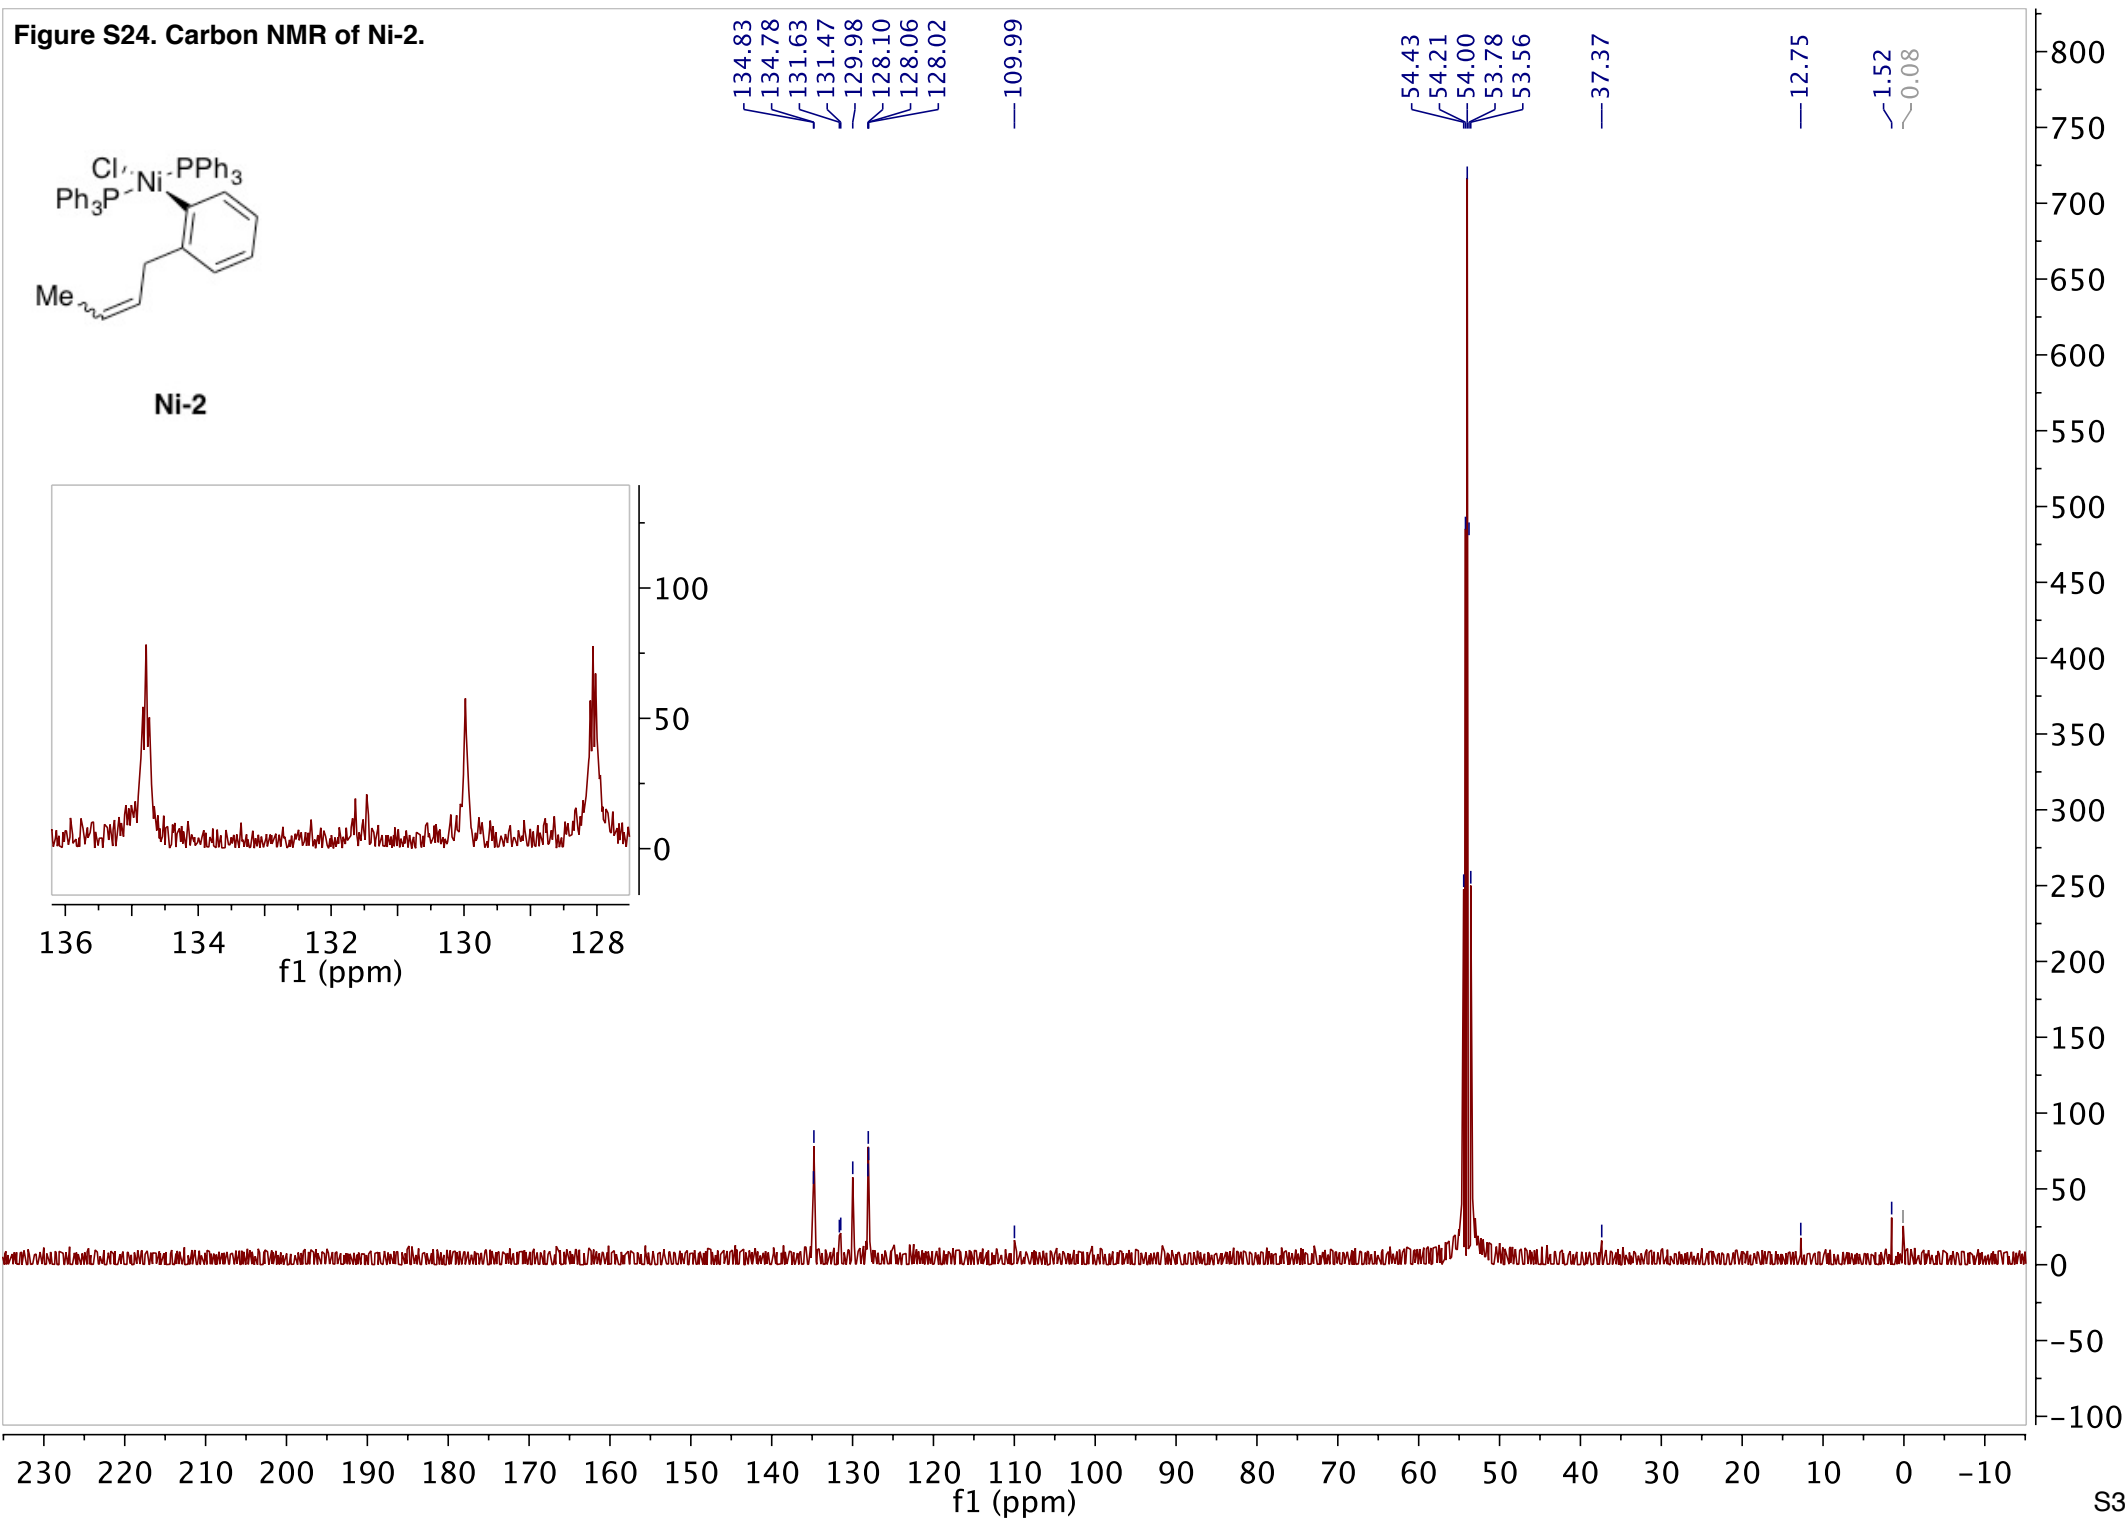

Figure S25. Phosphorus NMR of Ni-2.

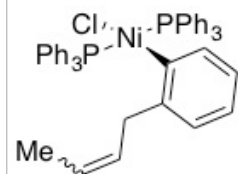

Ni-2

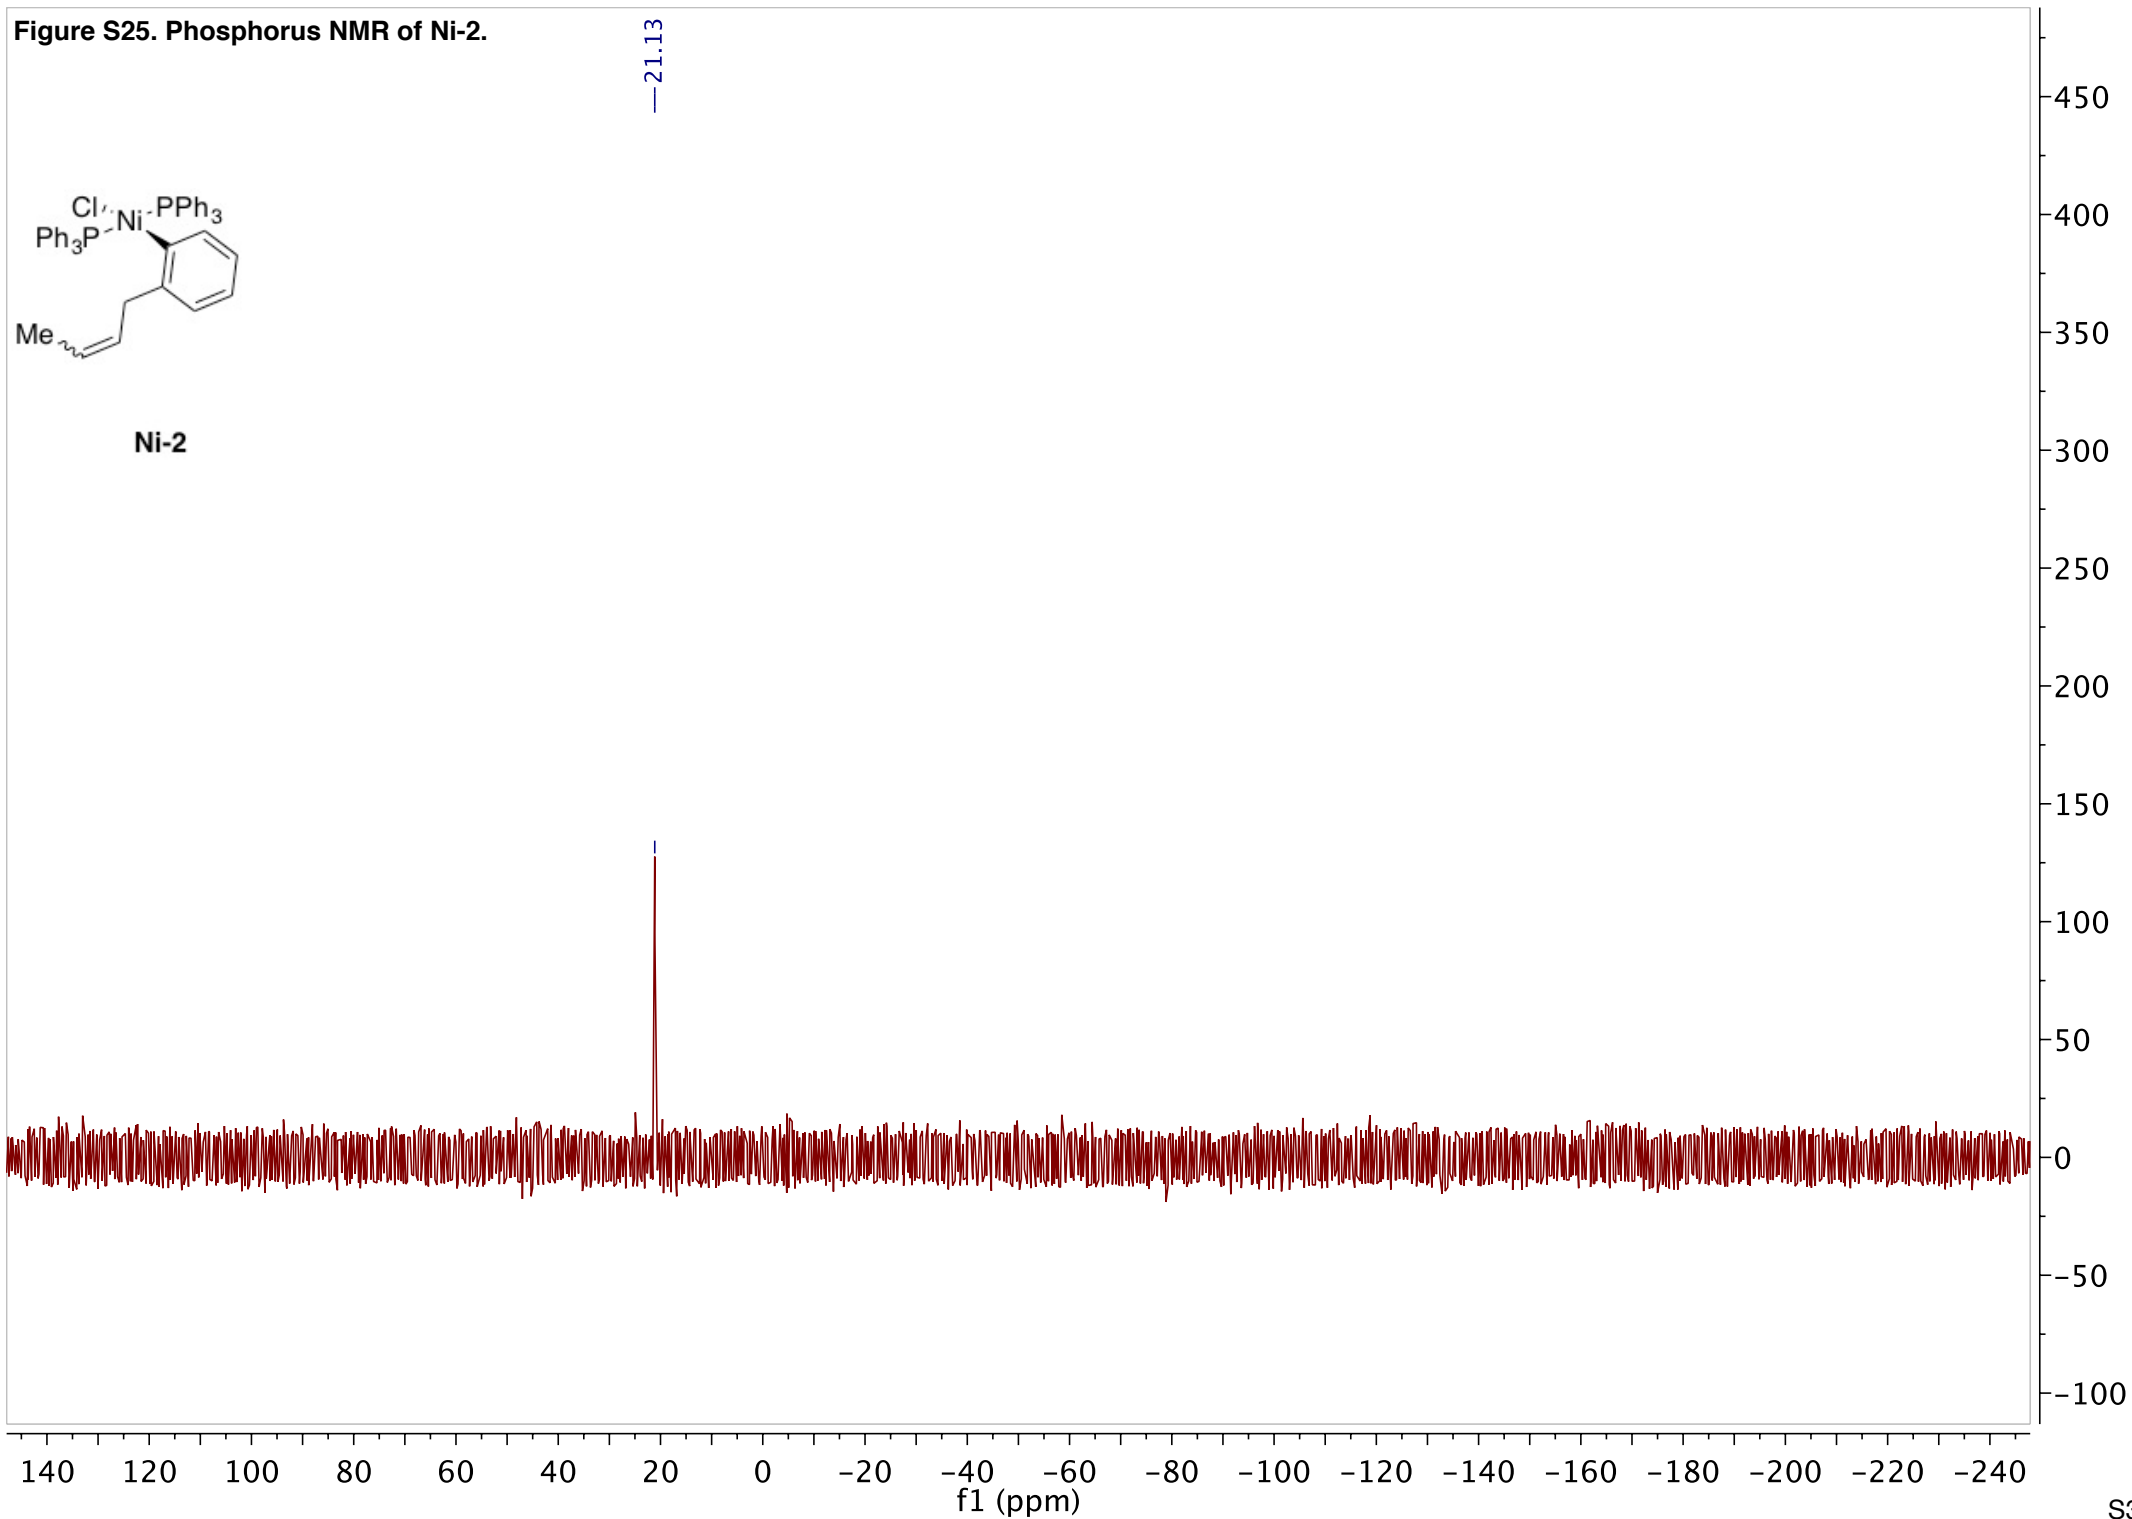

Figure S26. Proton NMR of Ni-3a.

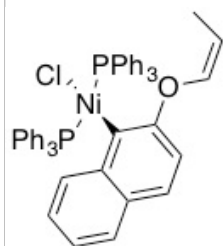

Ni-3a

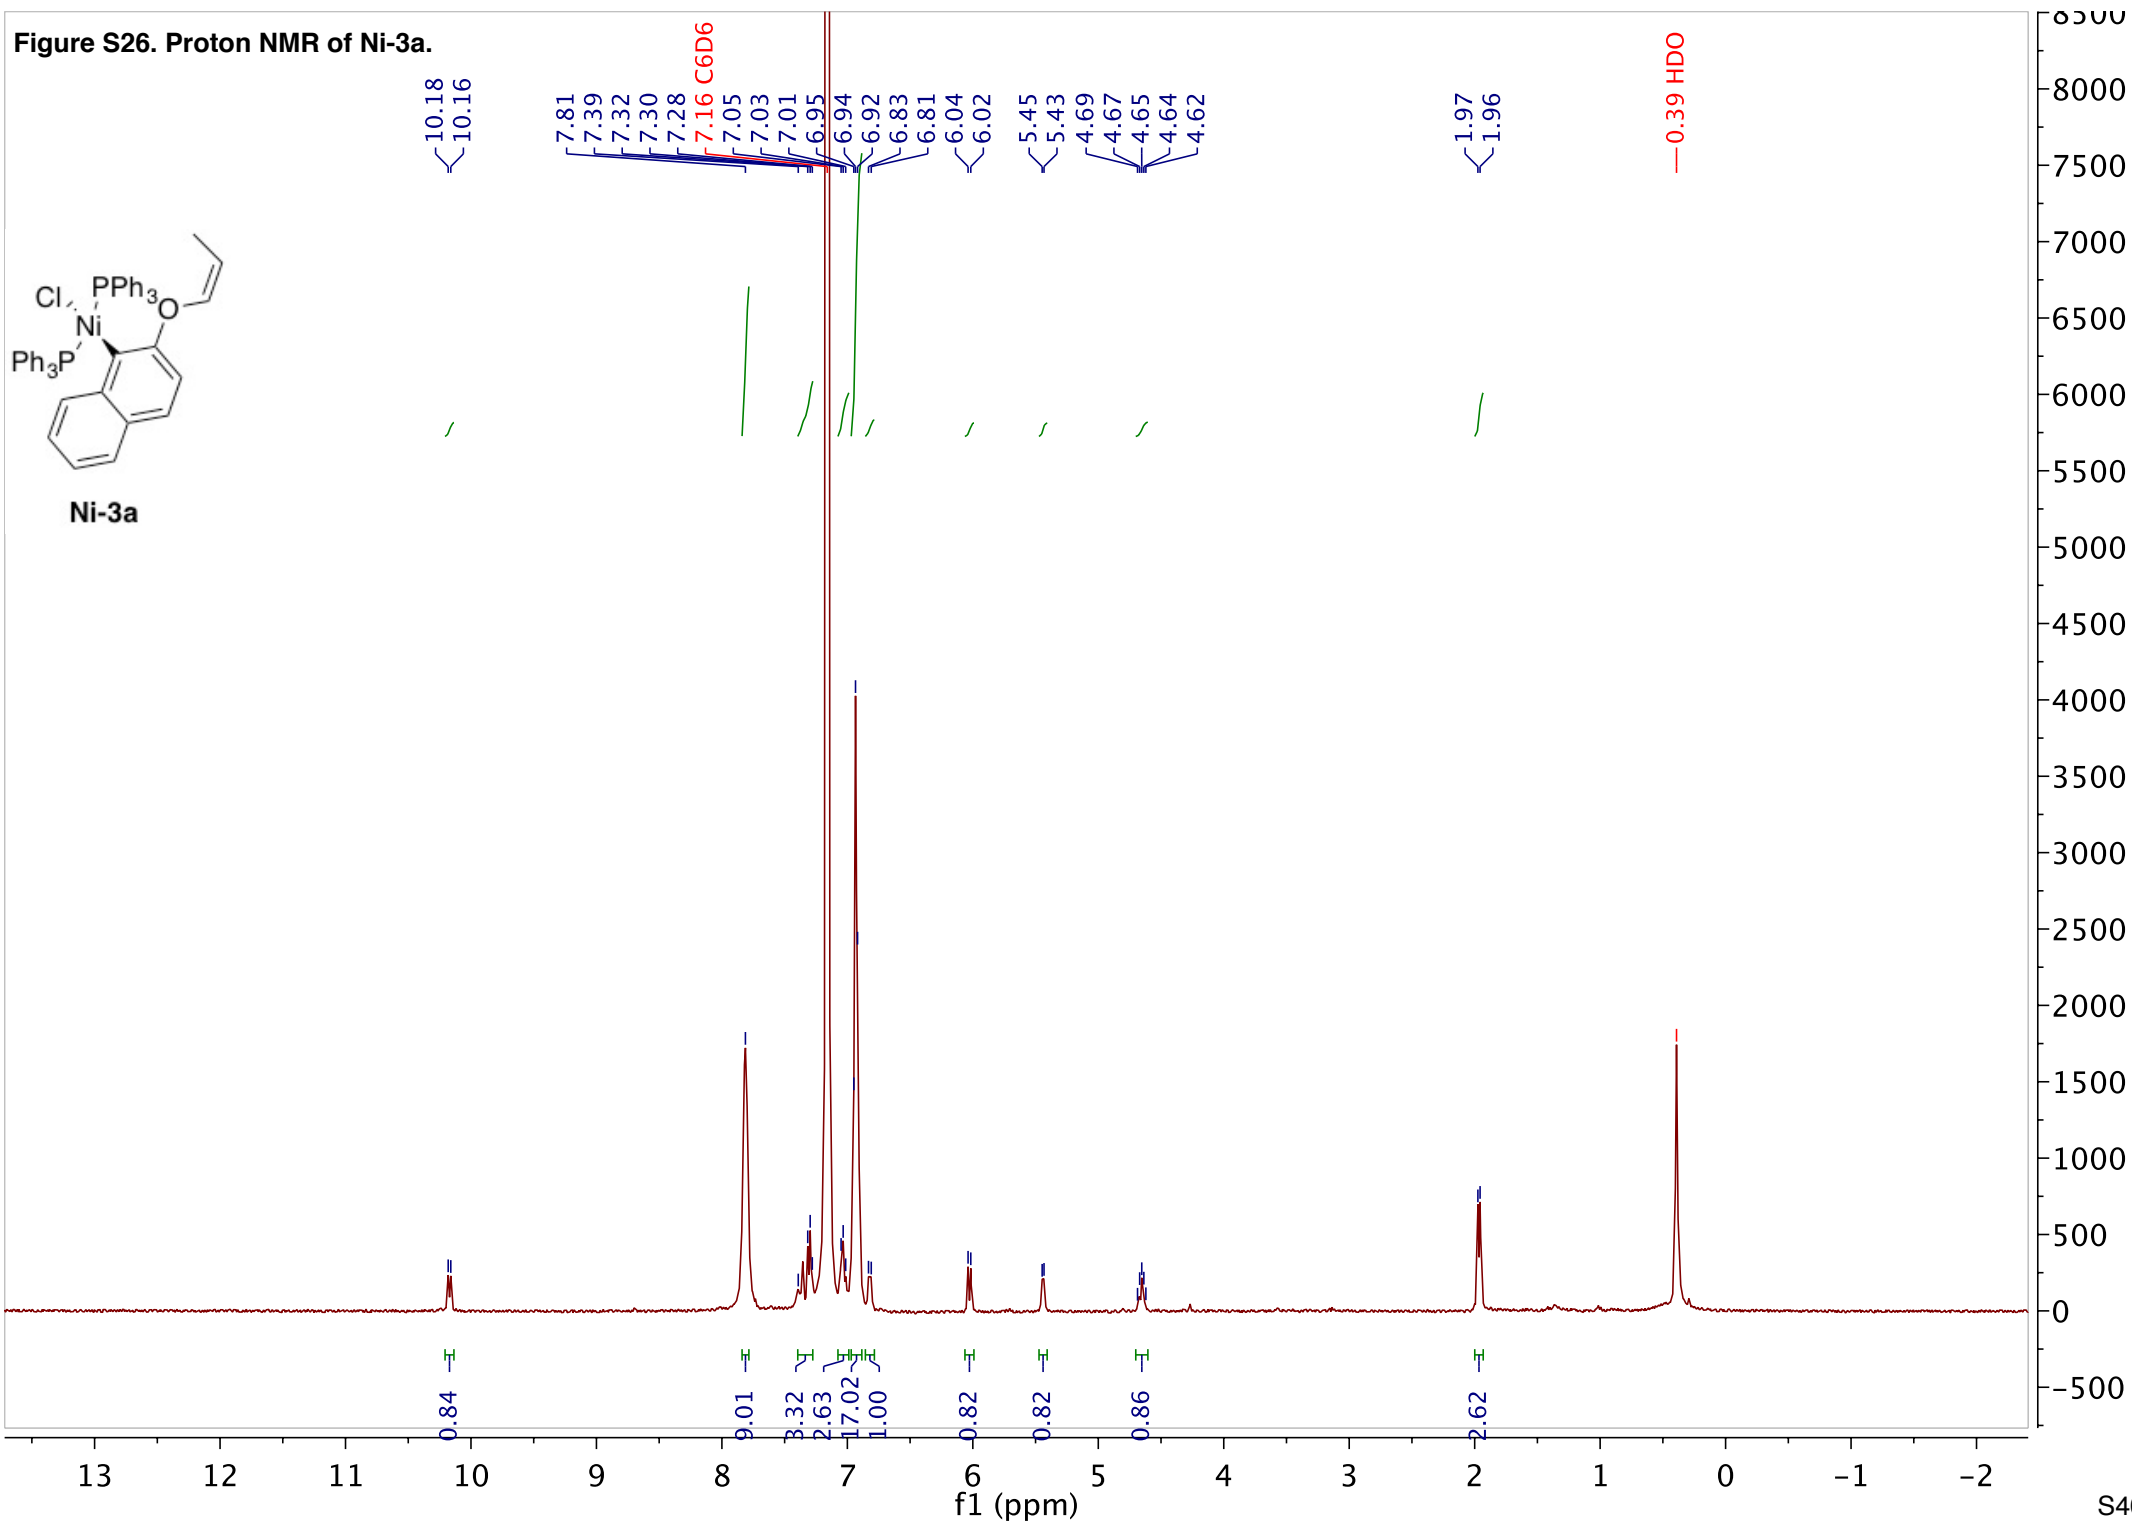

**Figure S27. Carbon NMR of Ni-3a.**

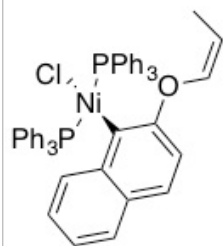

**Ni-3a**

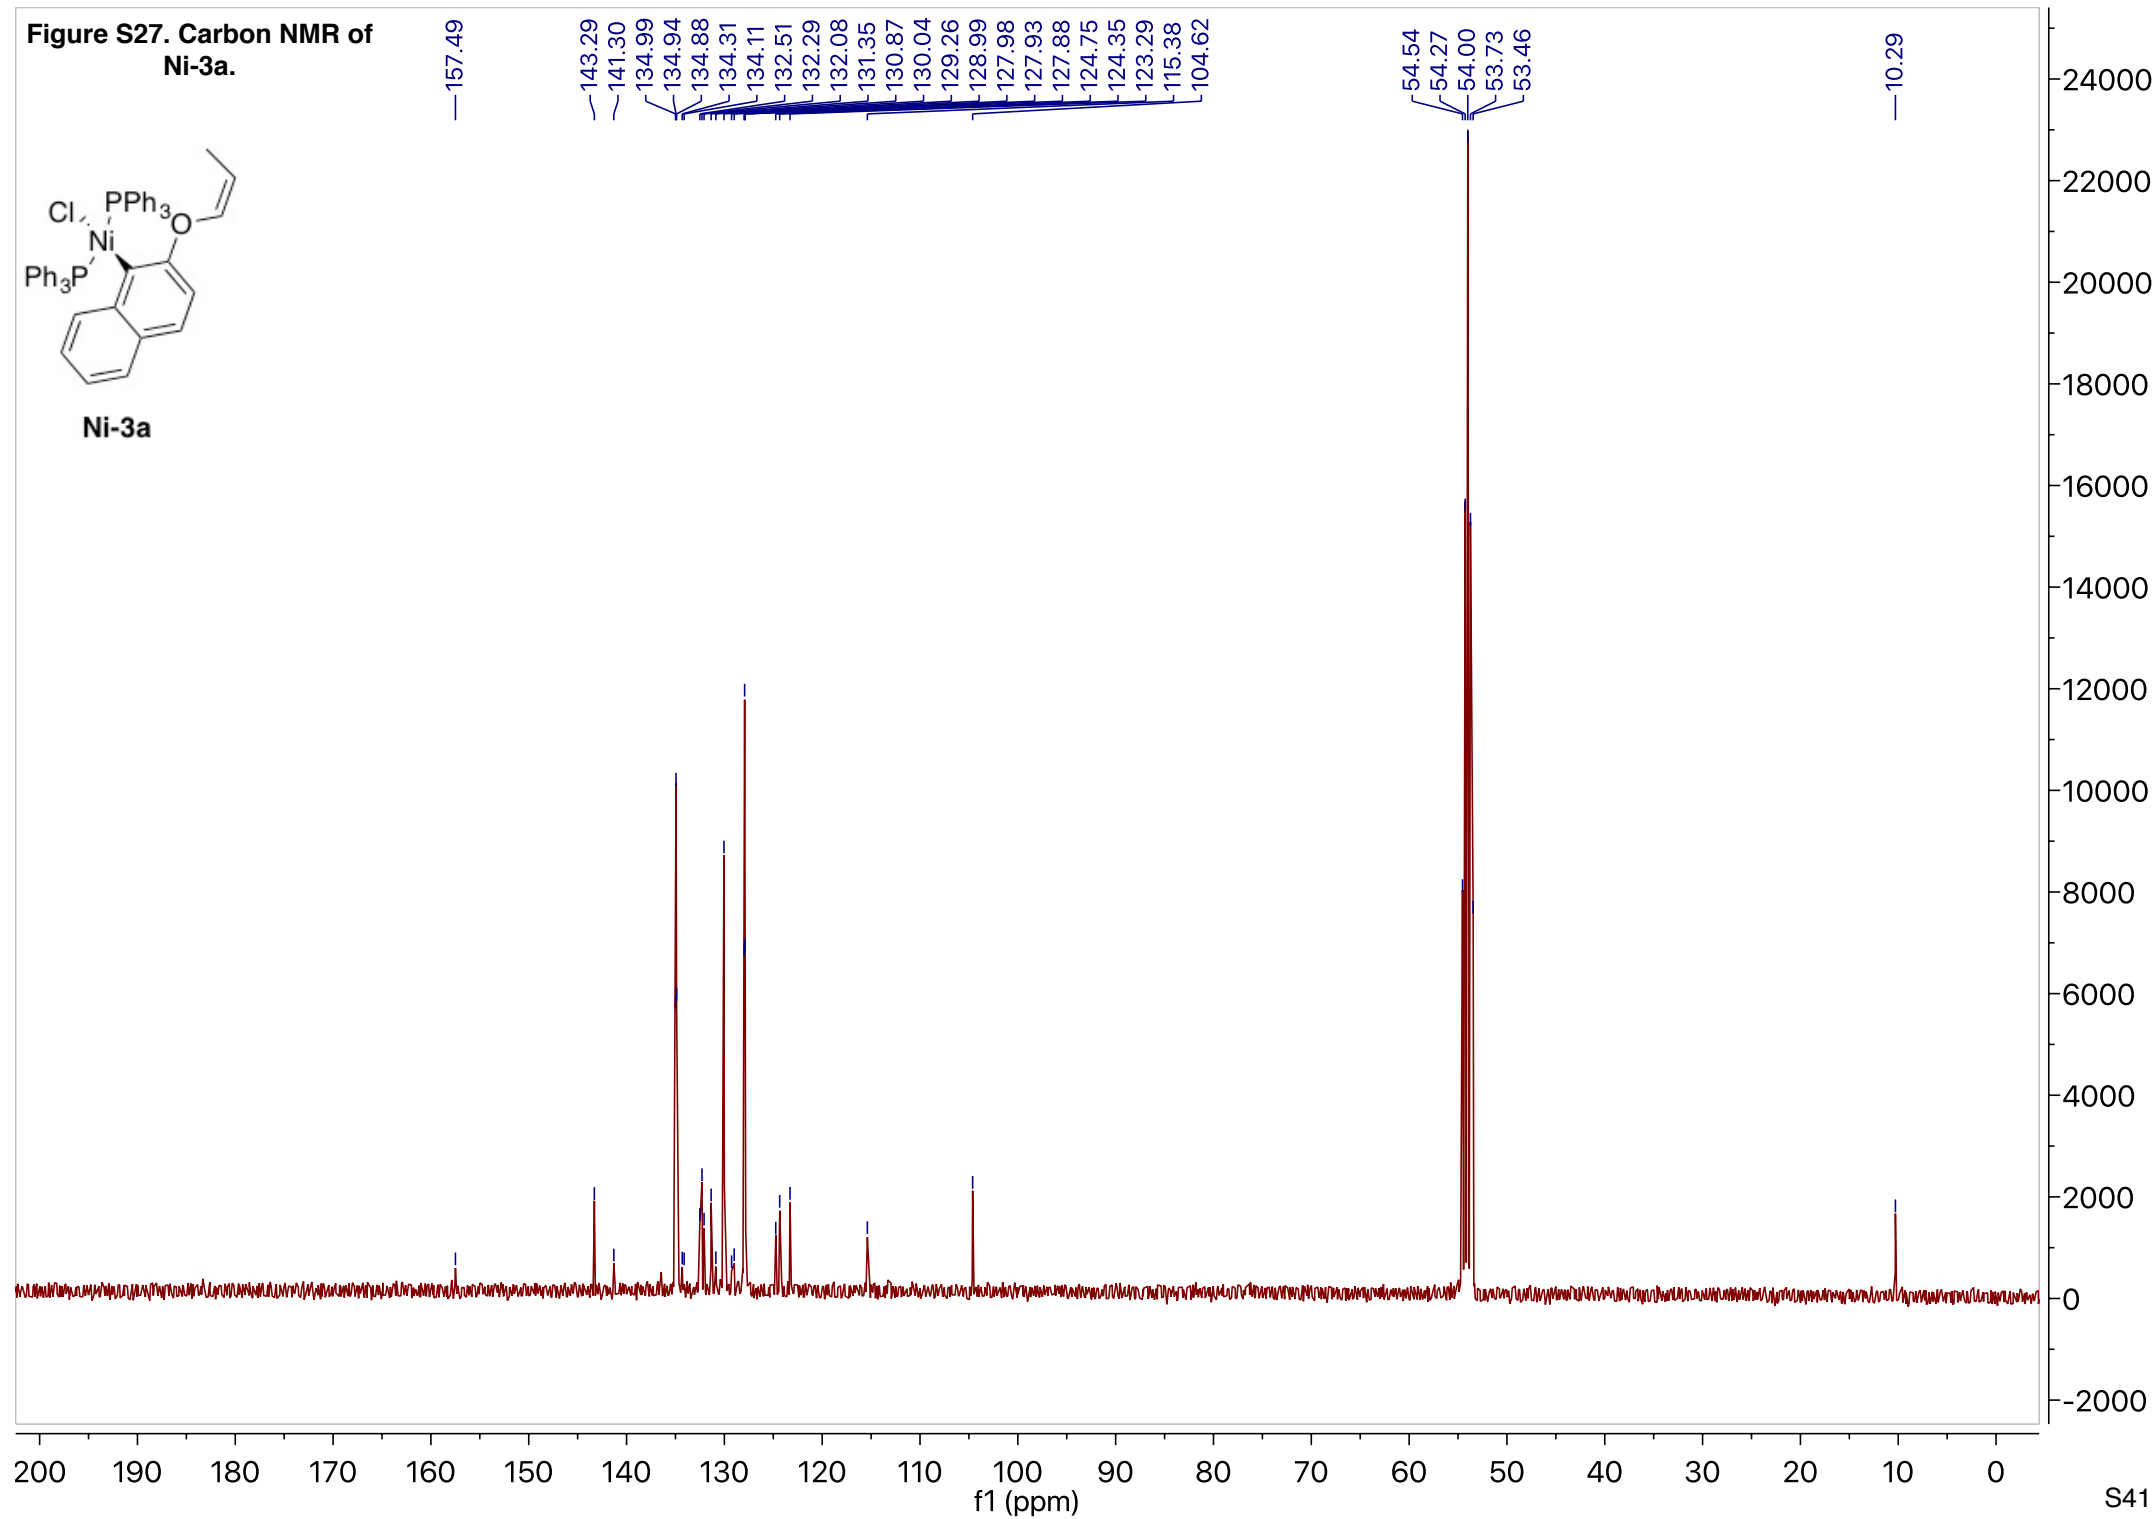

Figure S28. Phosphorus NMR of Ni-3a.

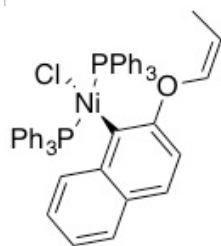

Ni-3a

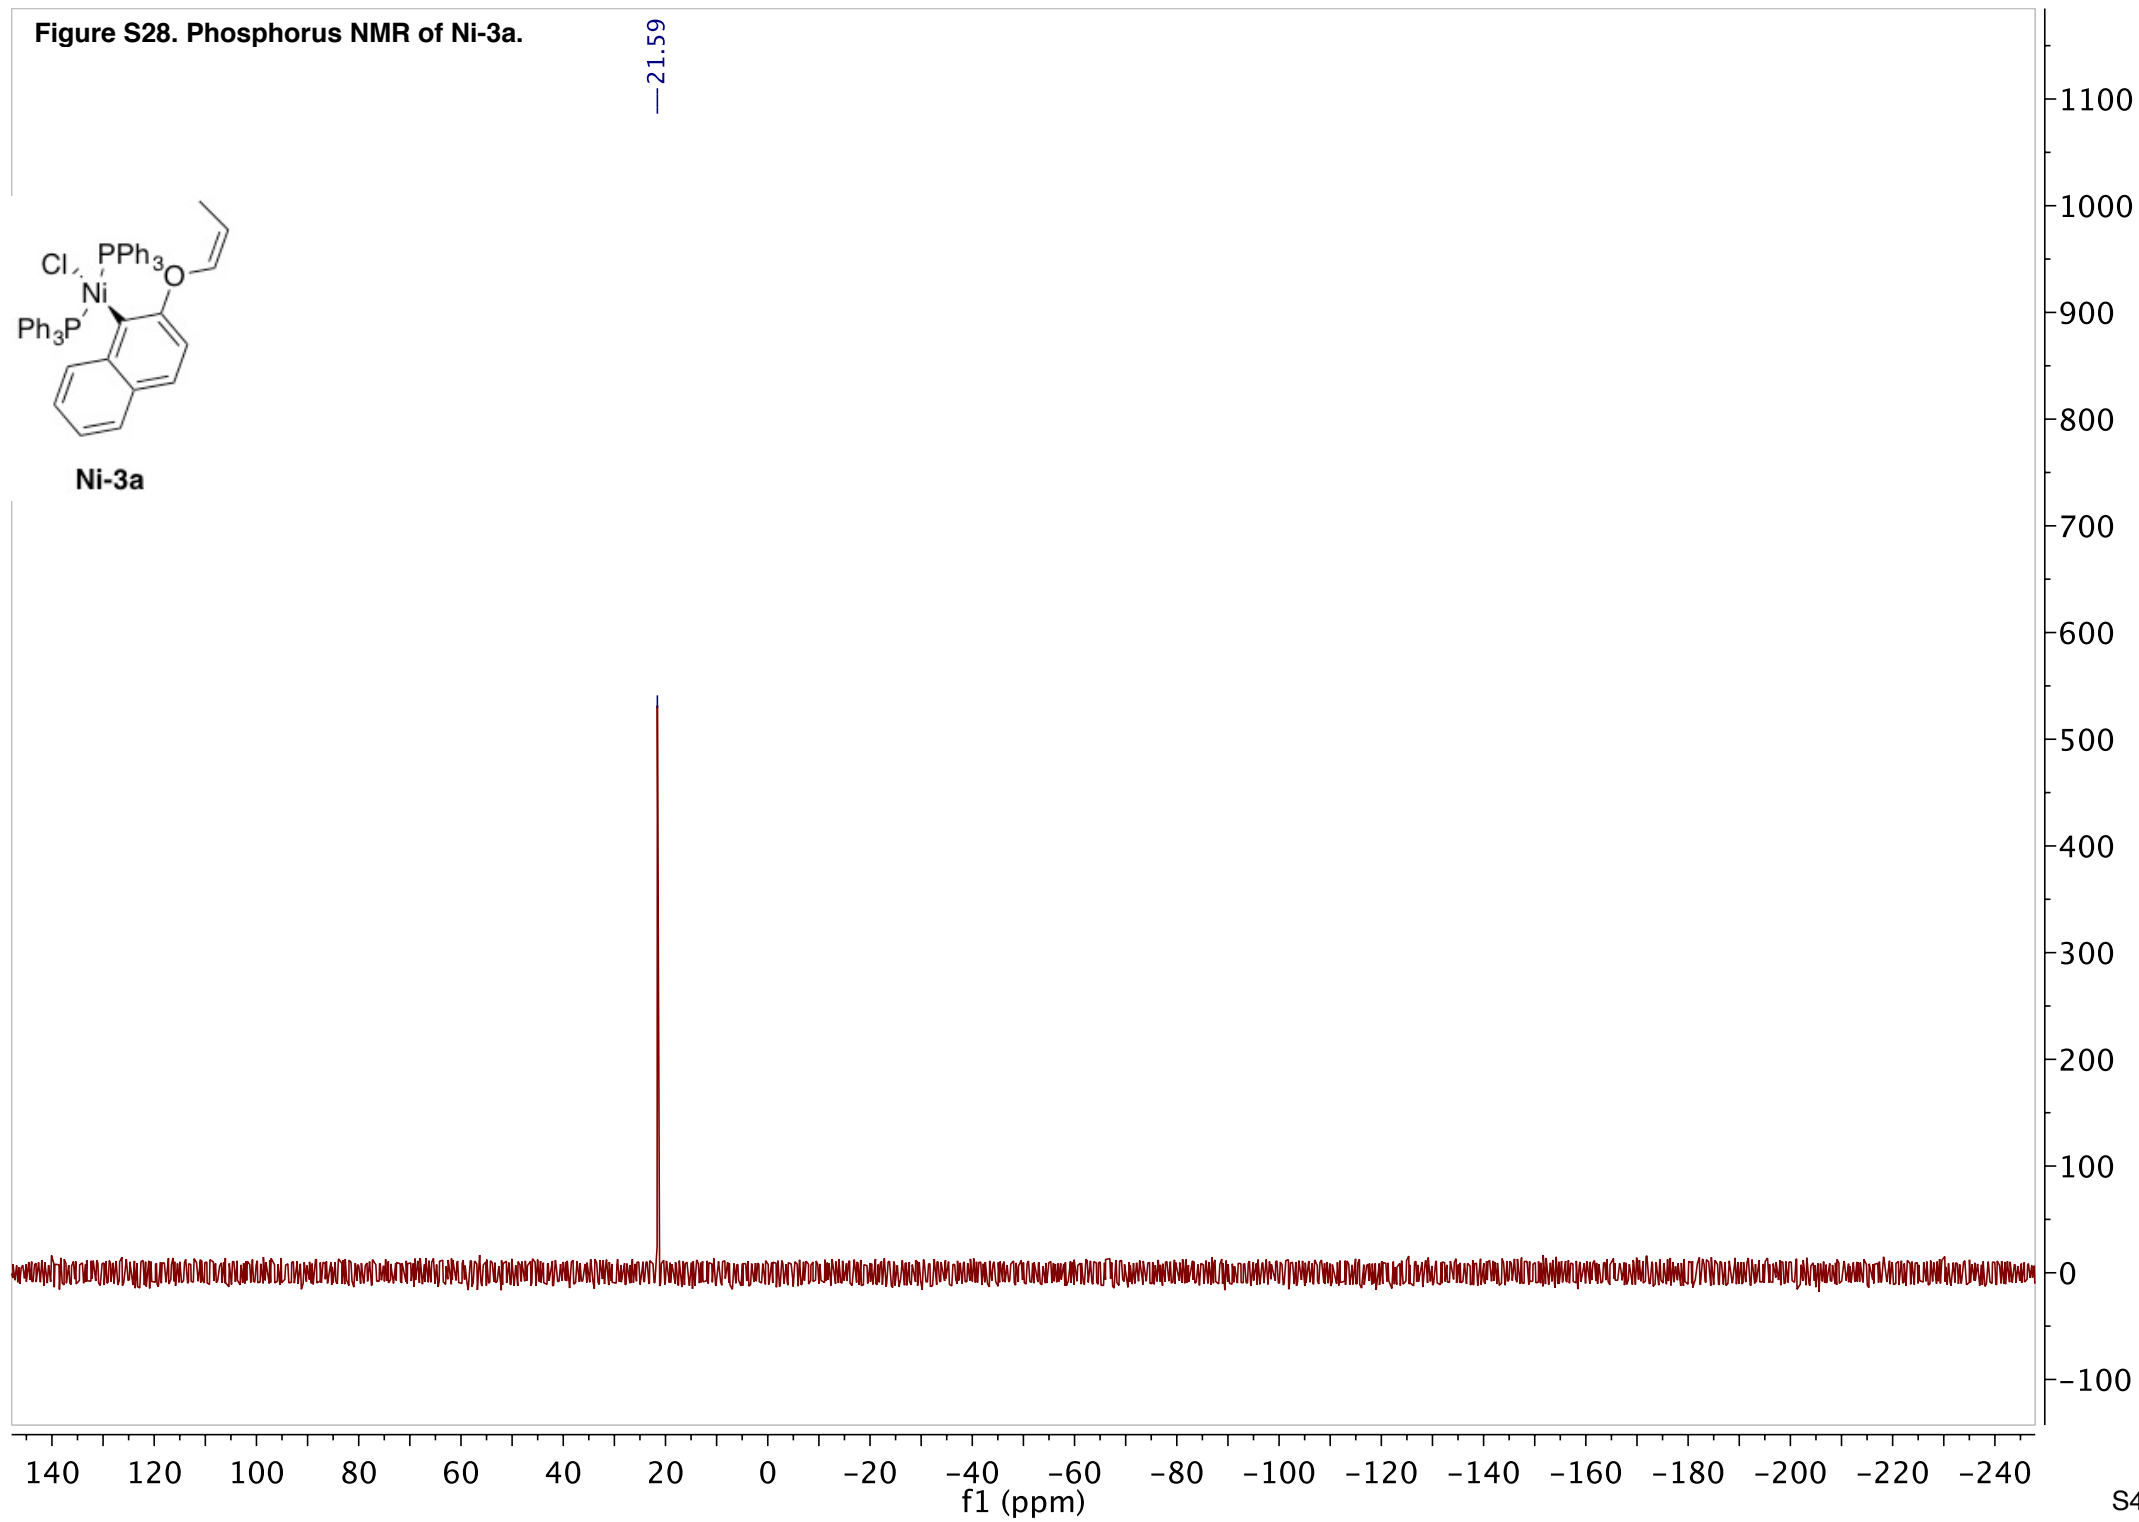

Figure S29. Proton NMR of Ni-3b.

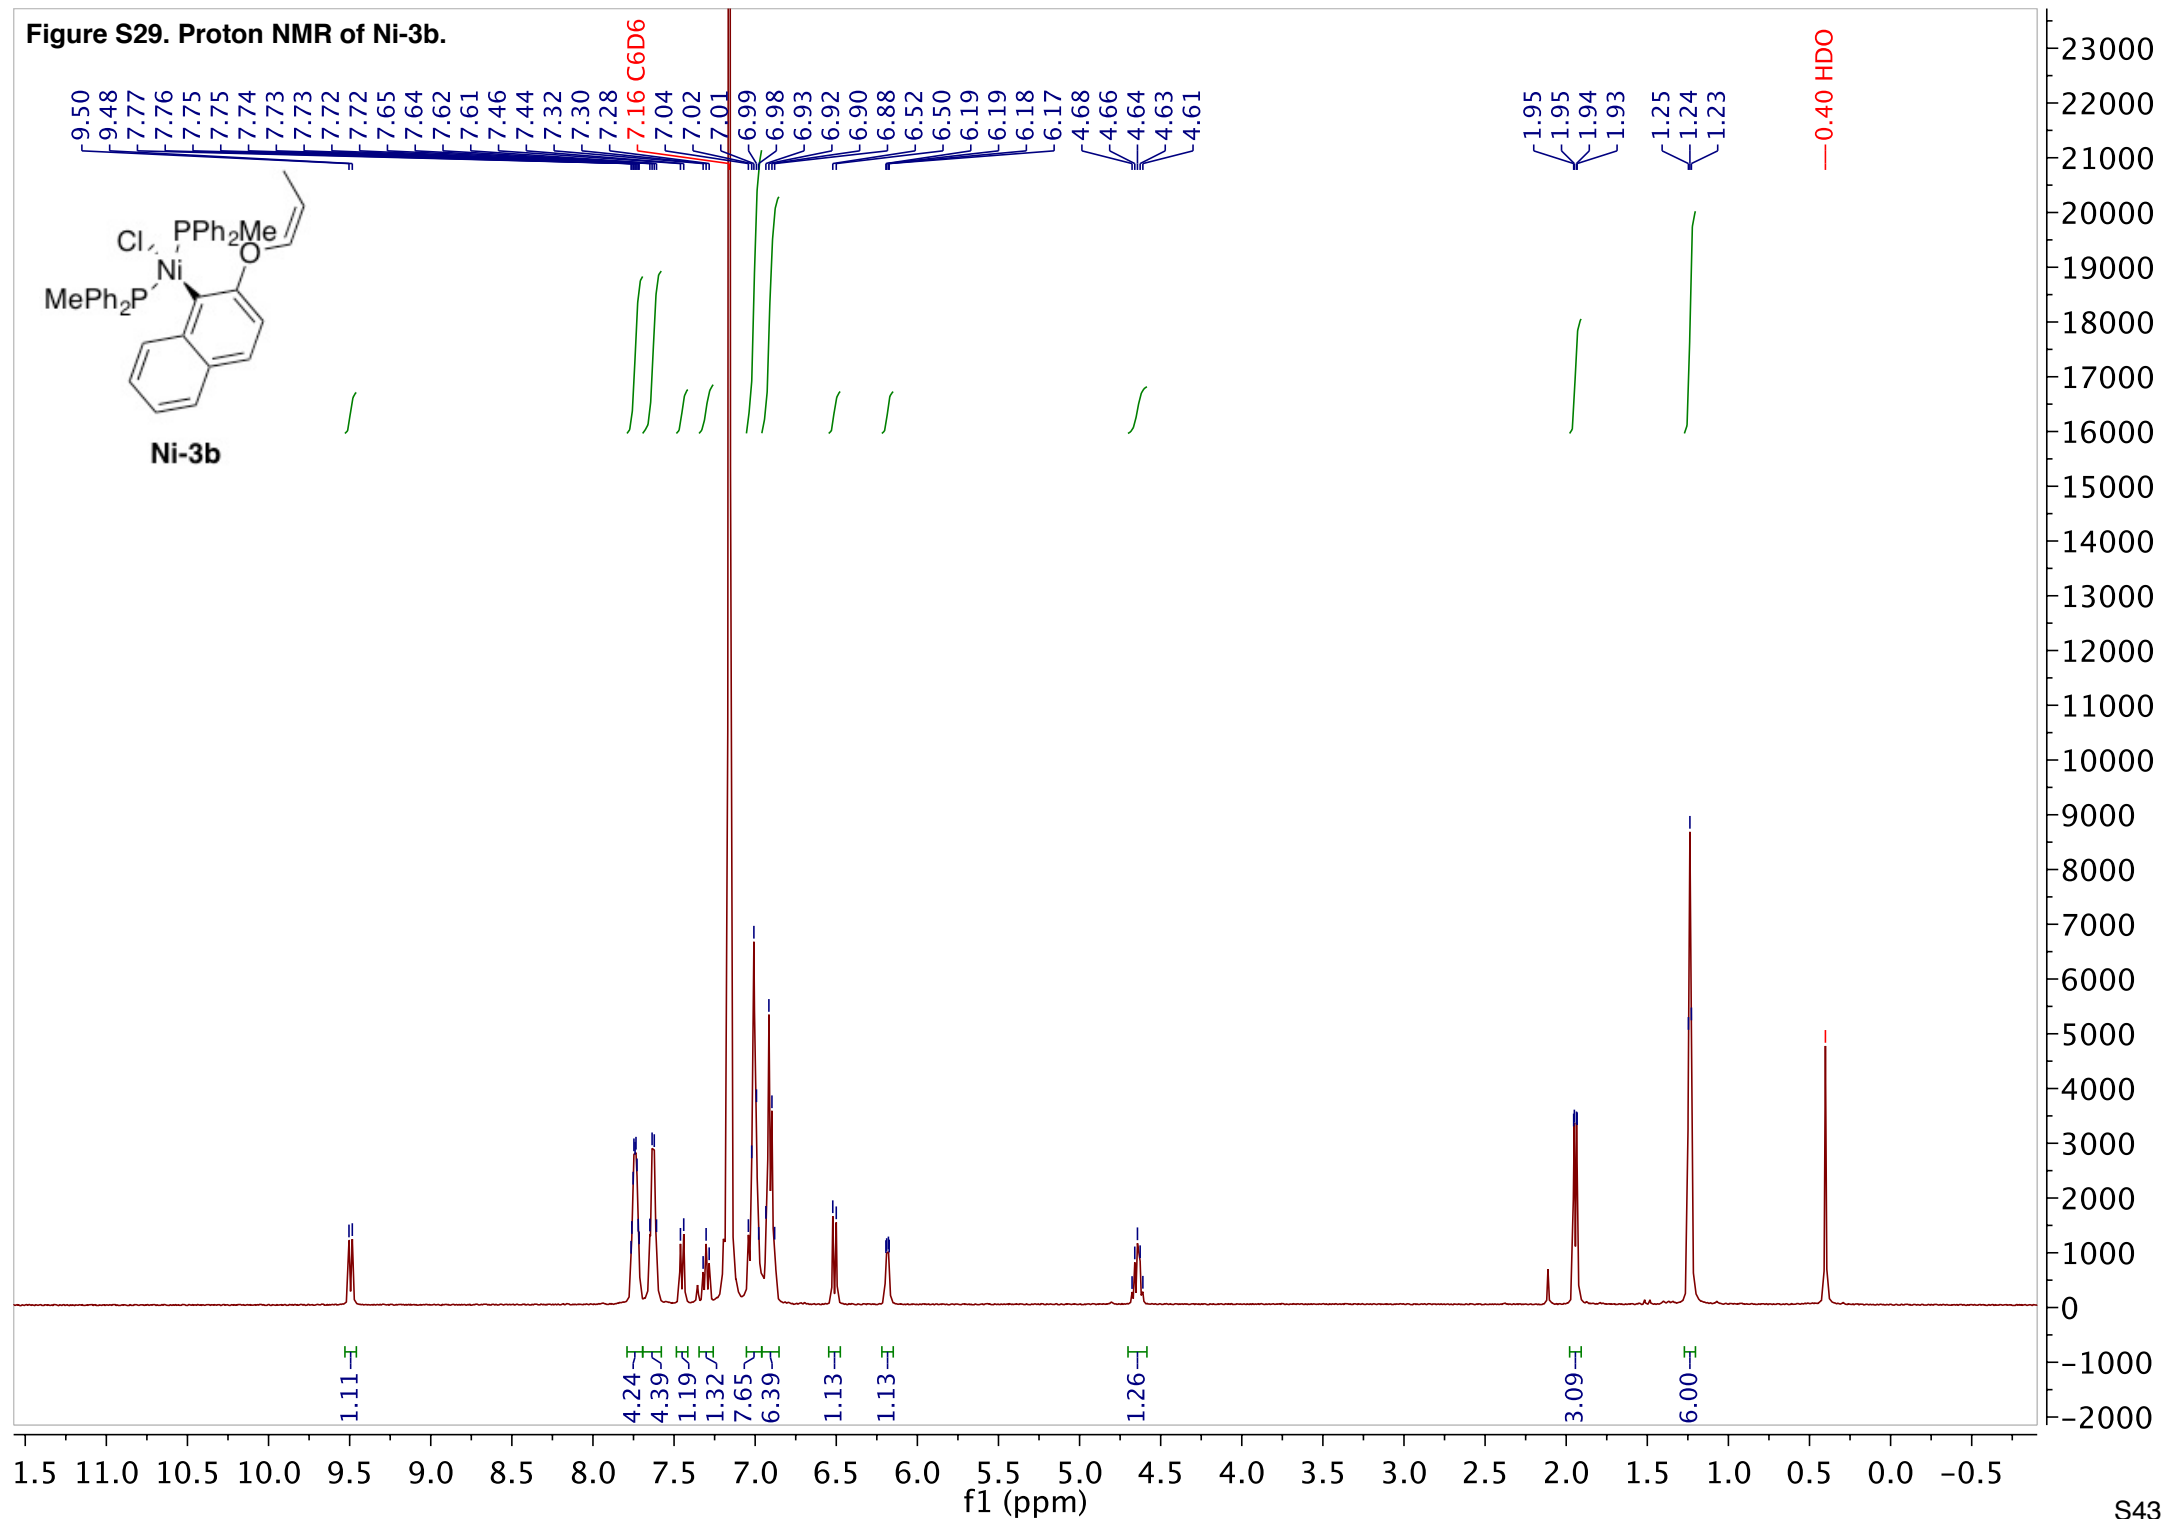

**Figure S30. Carbon of Ni-3b.**

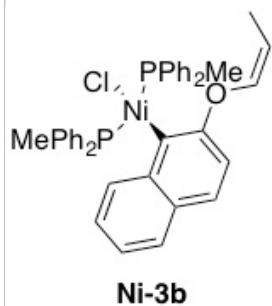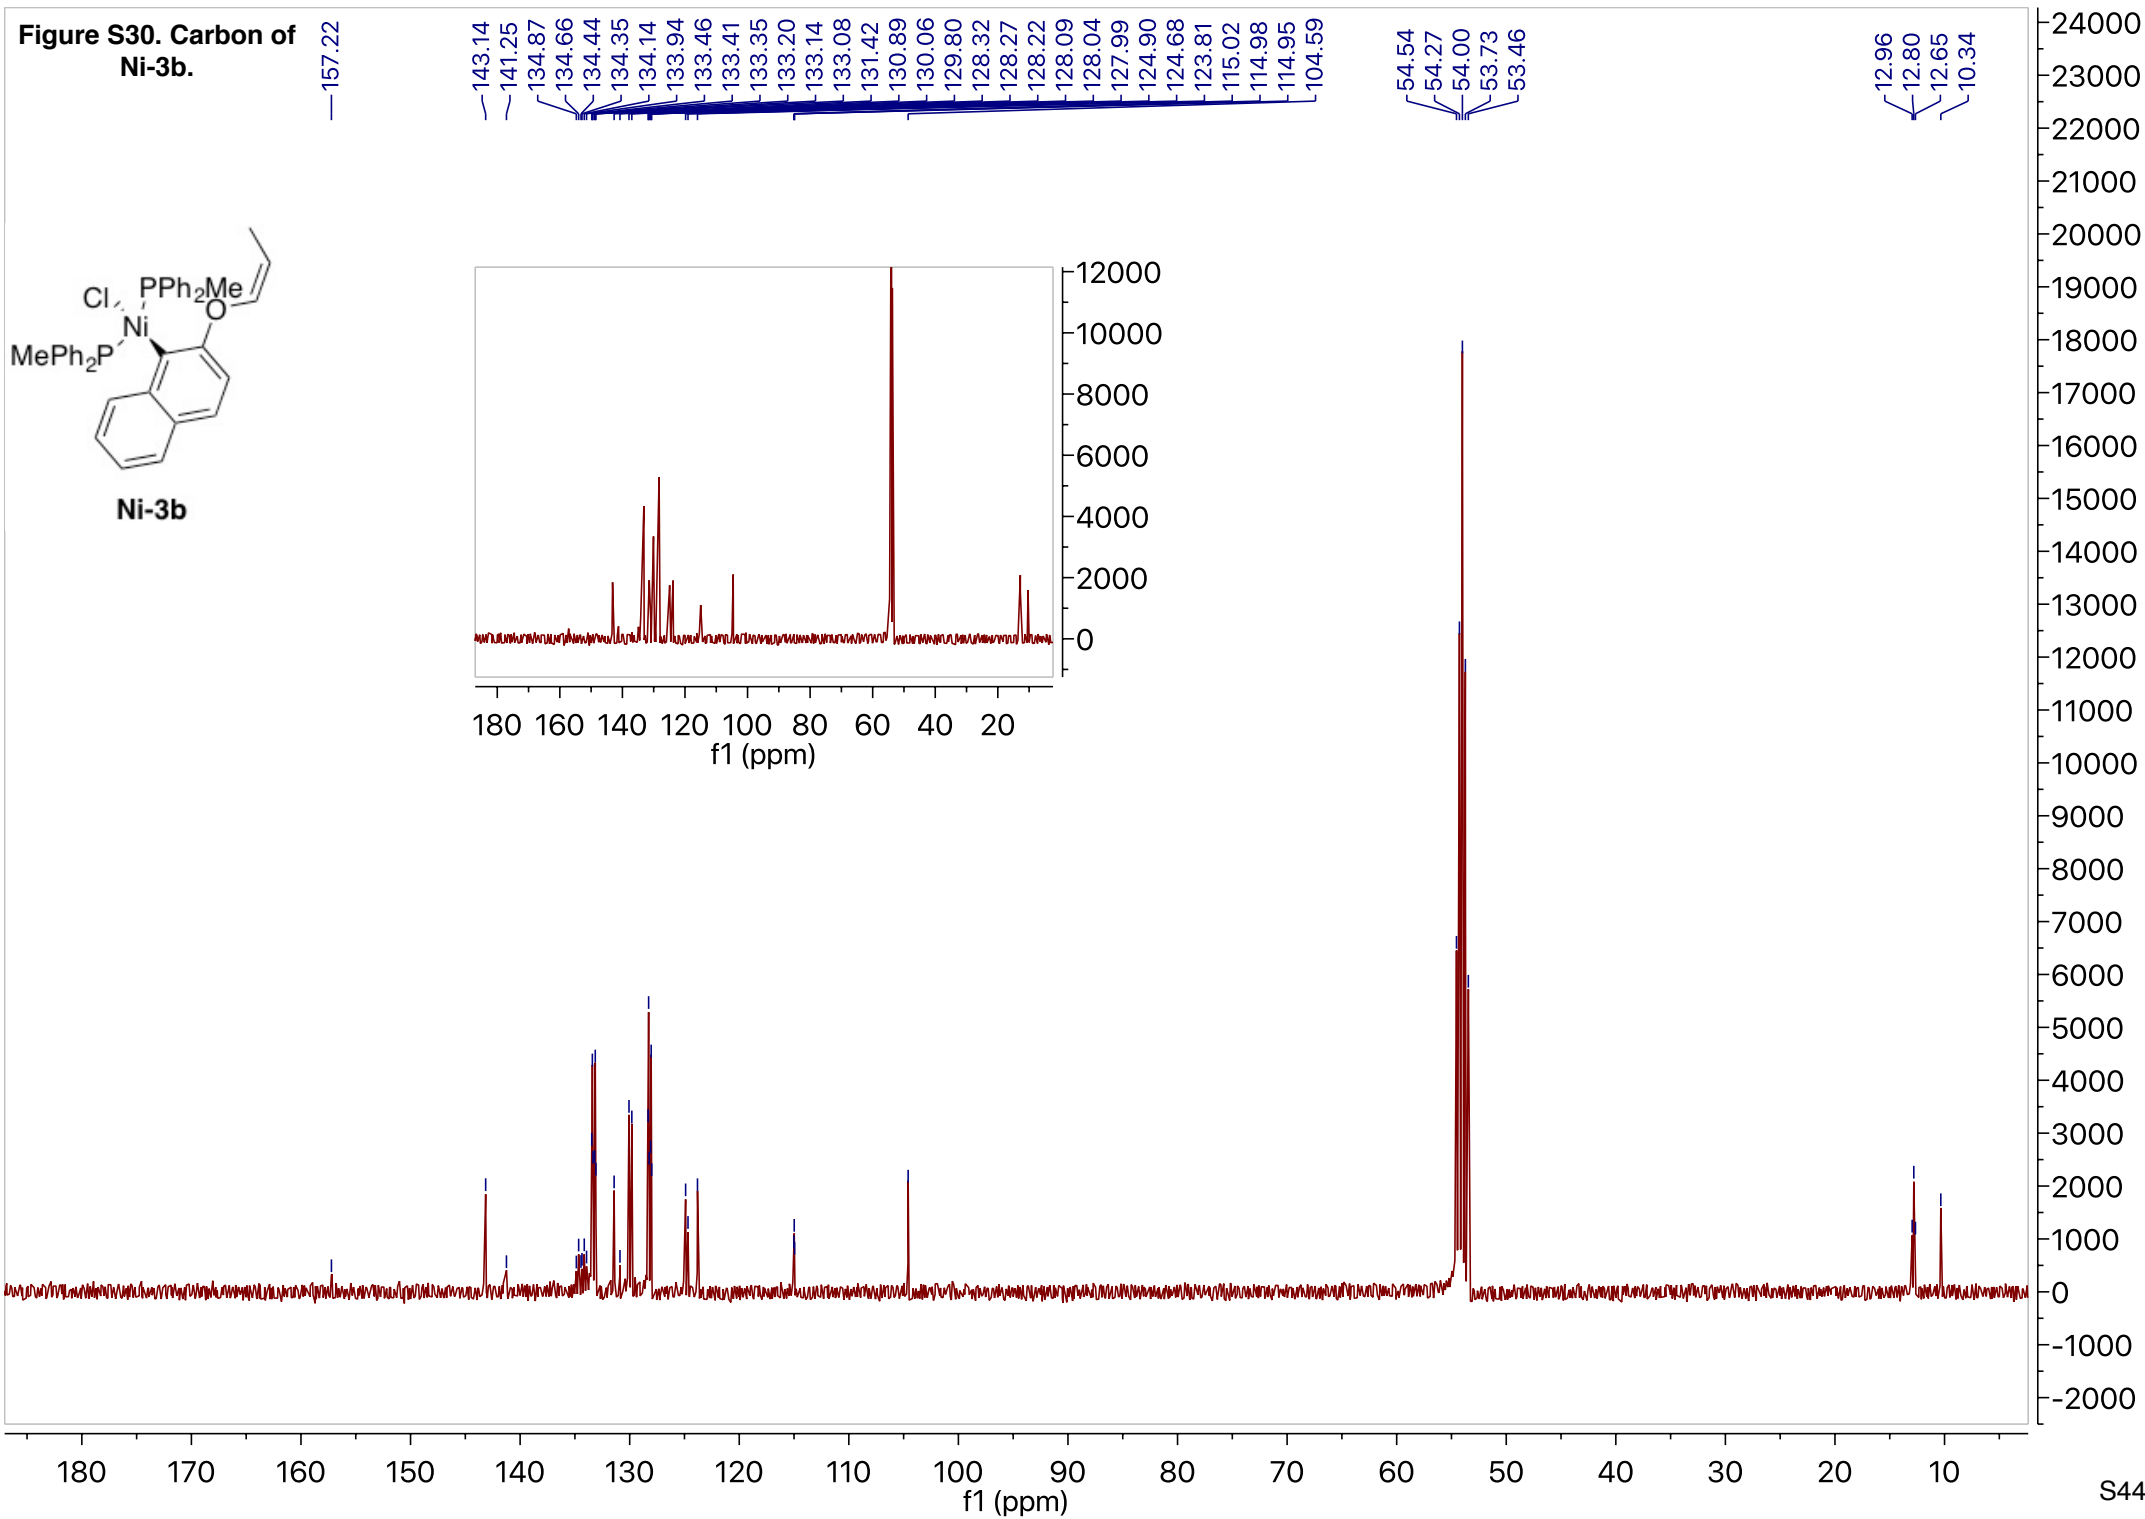



Figure S31. Phosphorus NMR of Ni-3b.

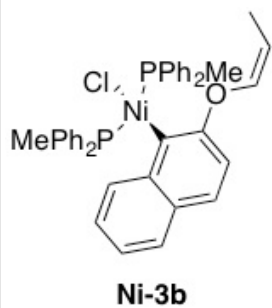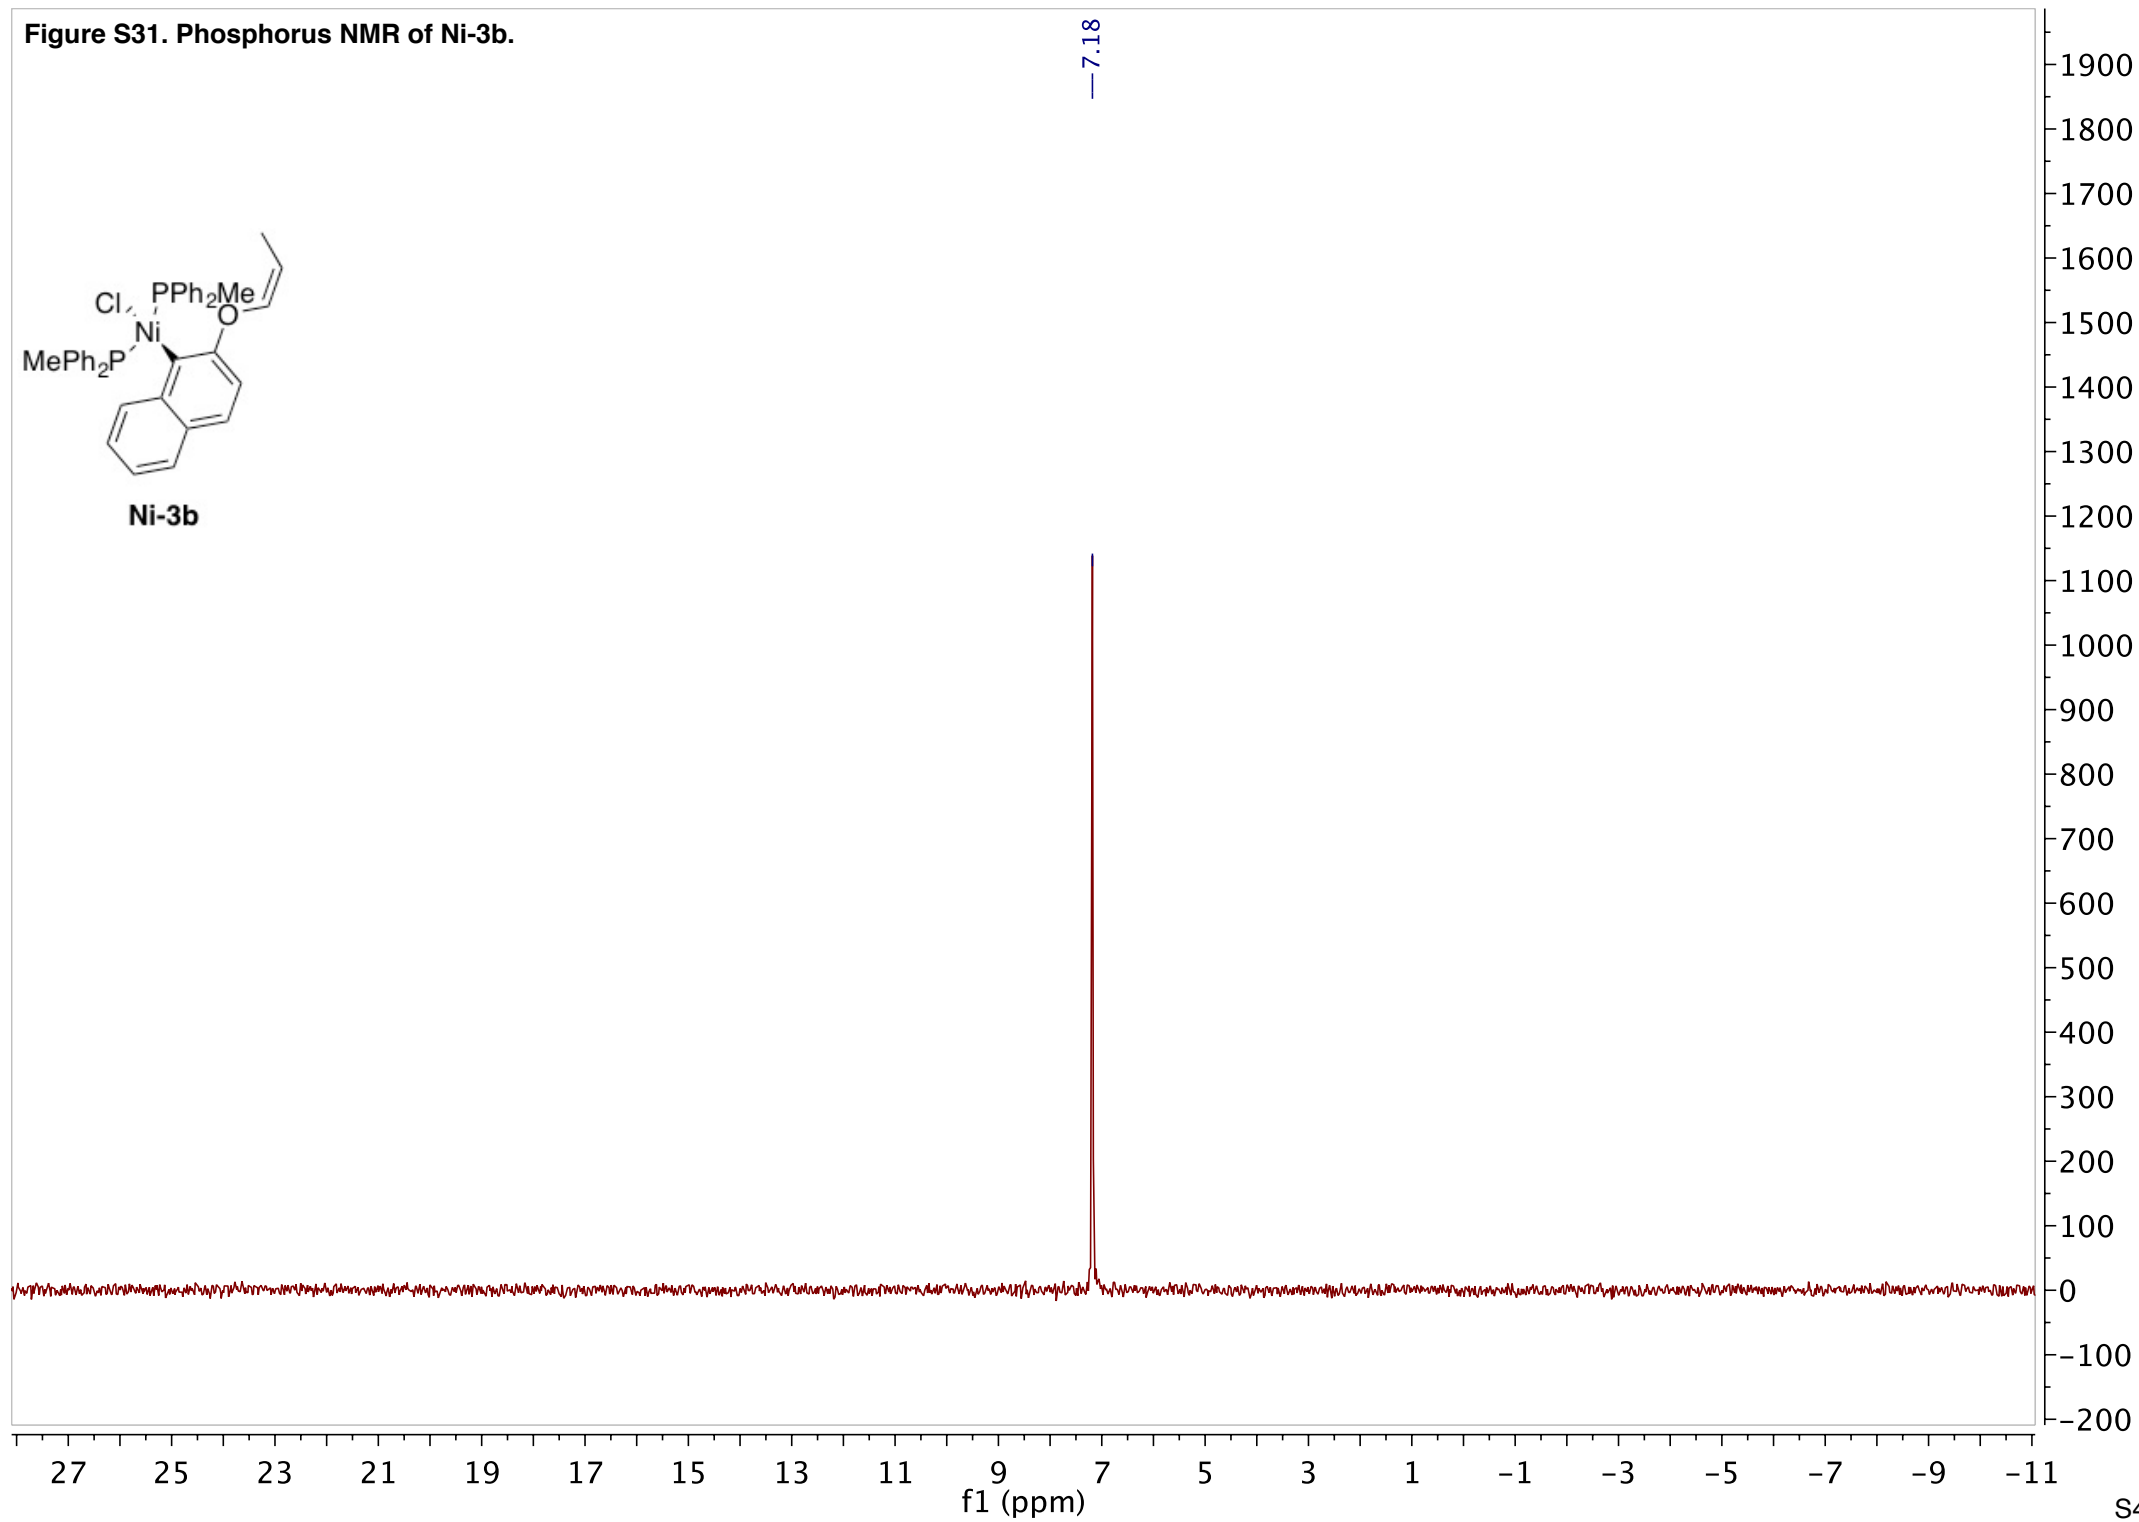

Figure S32. Proton NMR of Ni-4.

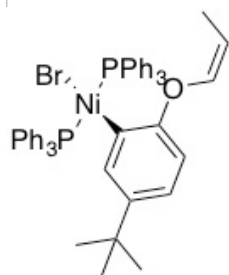

Ni-4

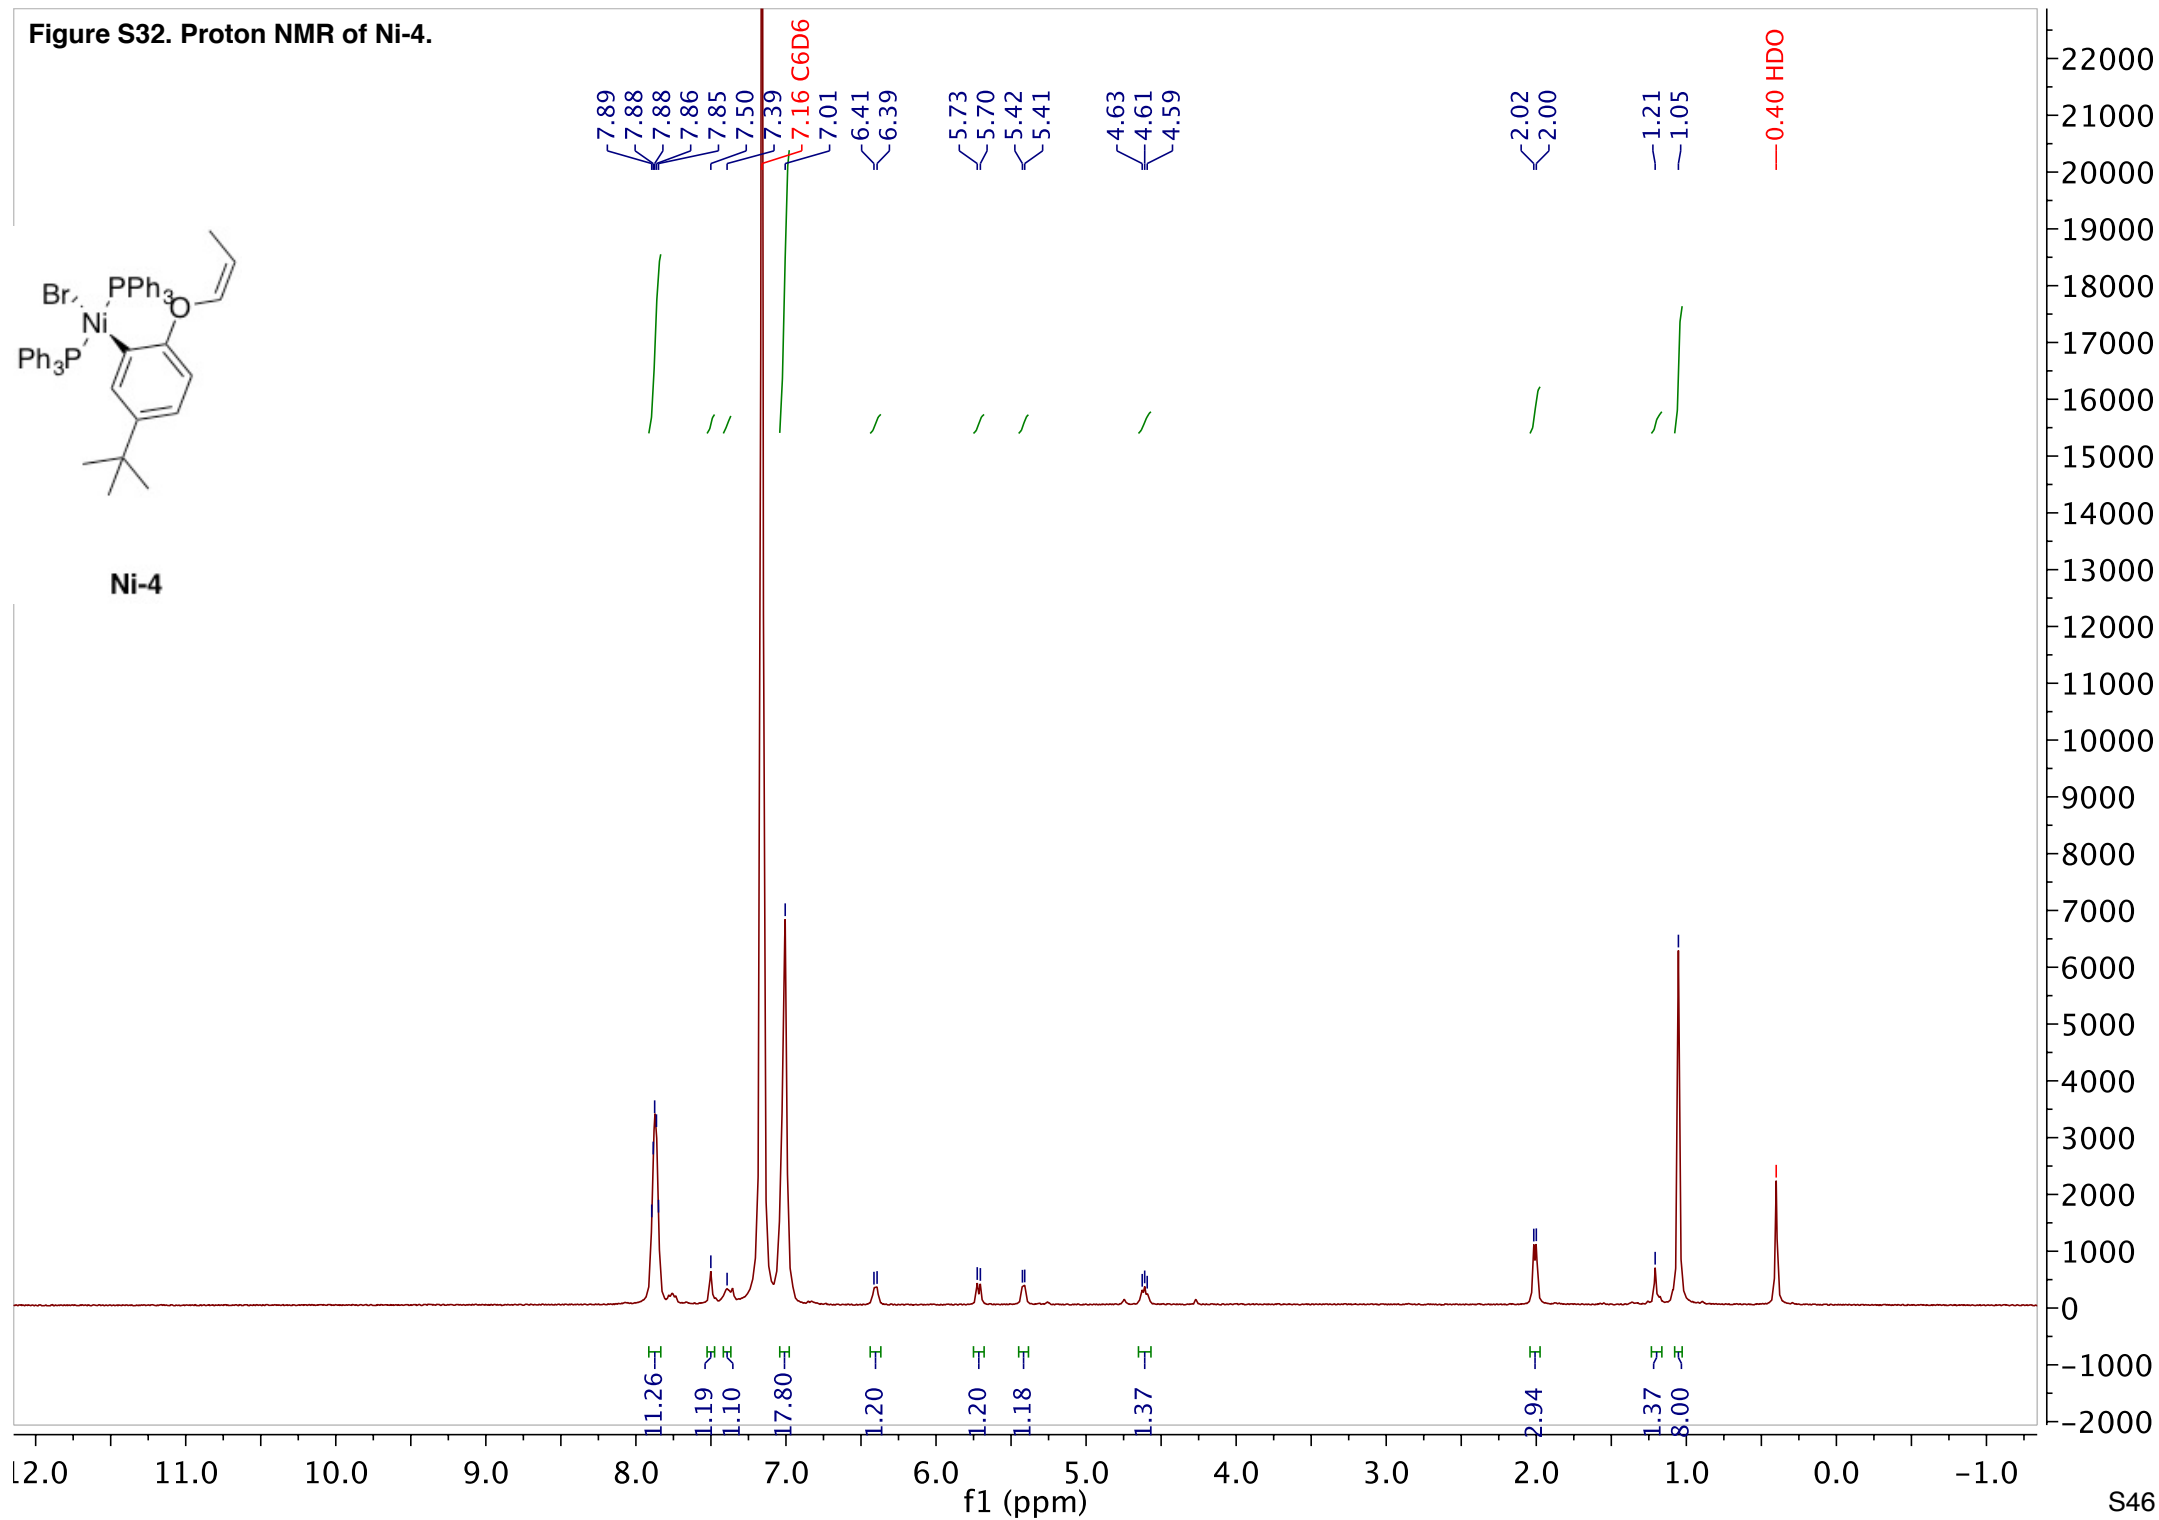

**Figure S33. Carbon NMR of Ni-4.**

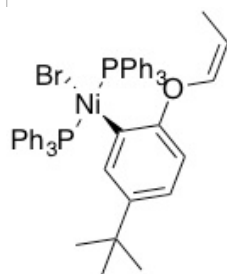

**Ni-4**

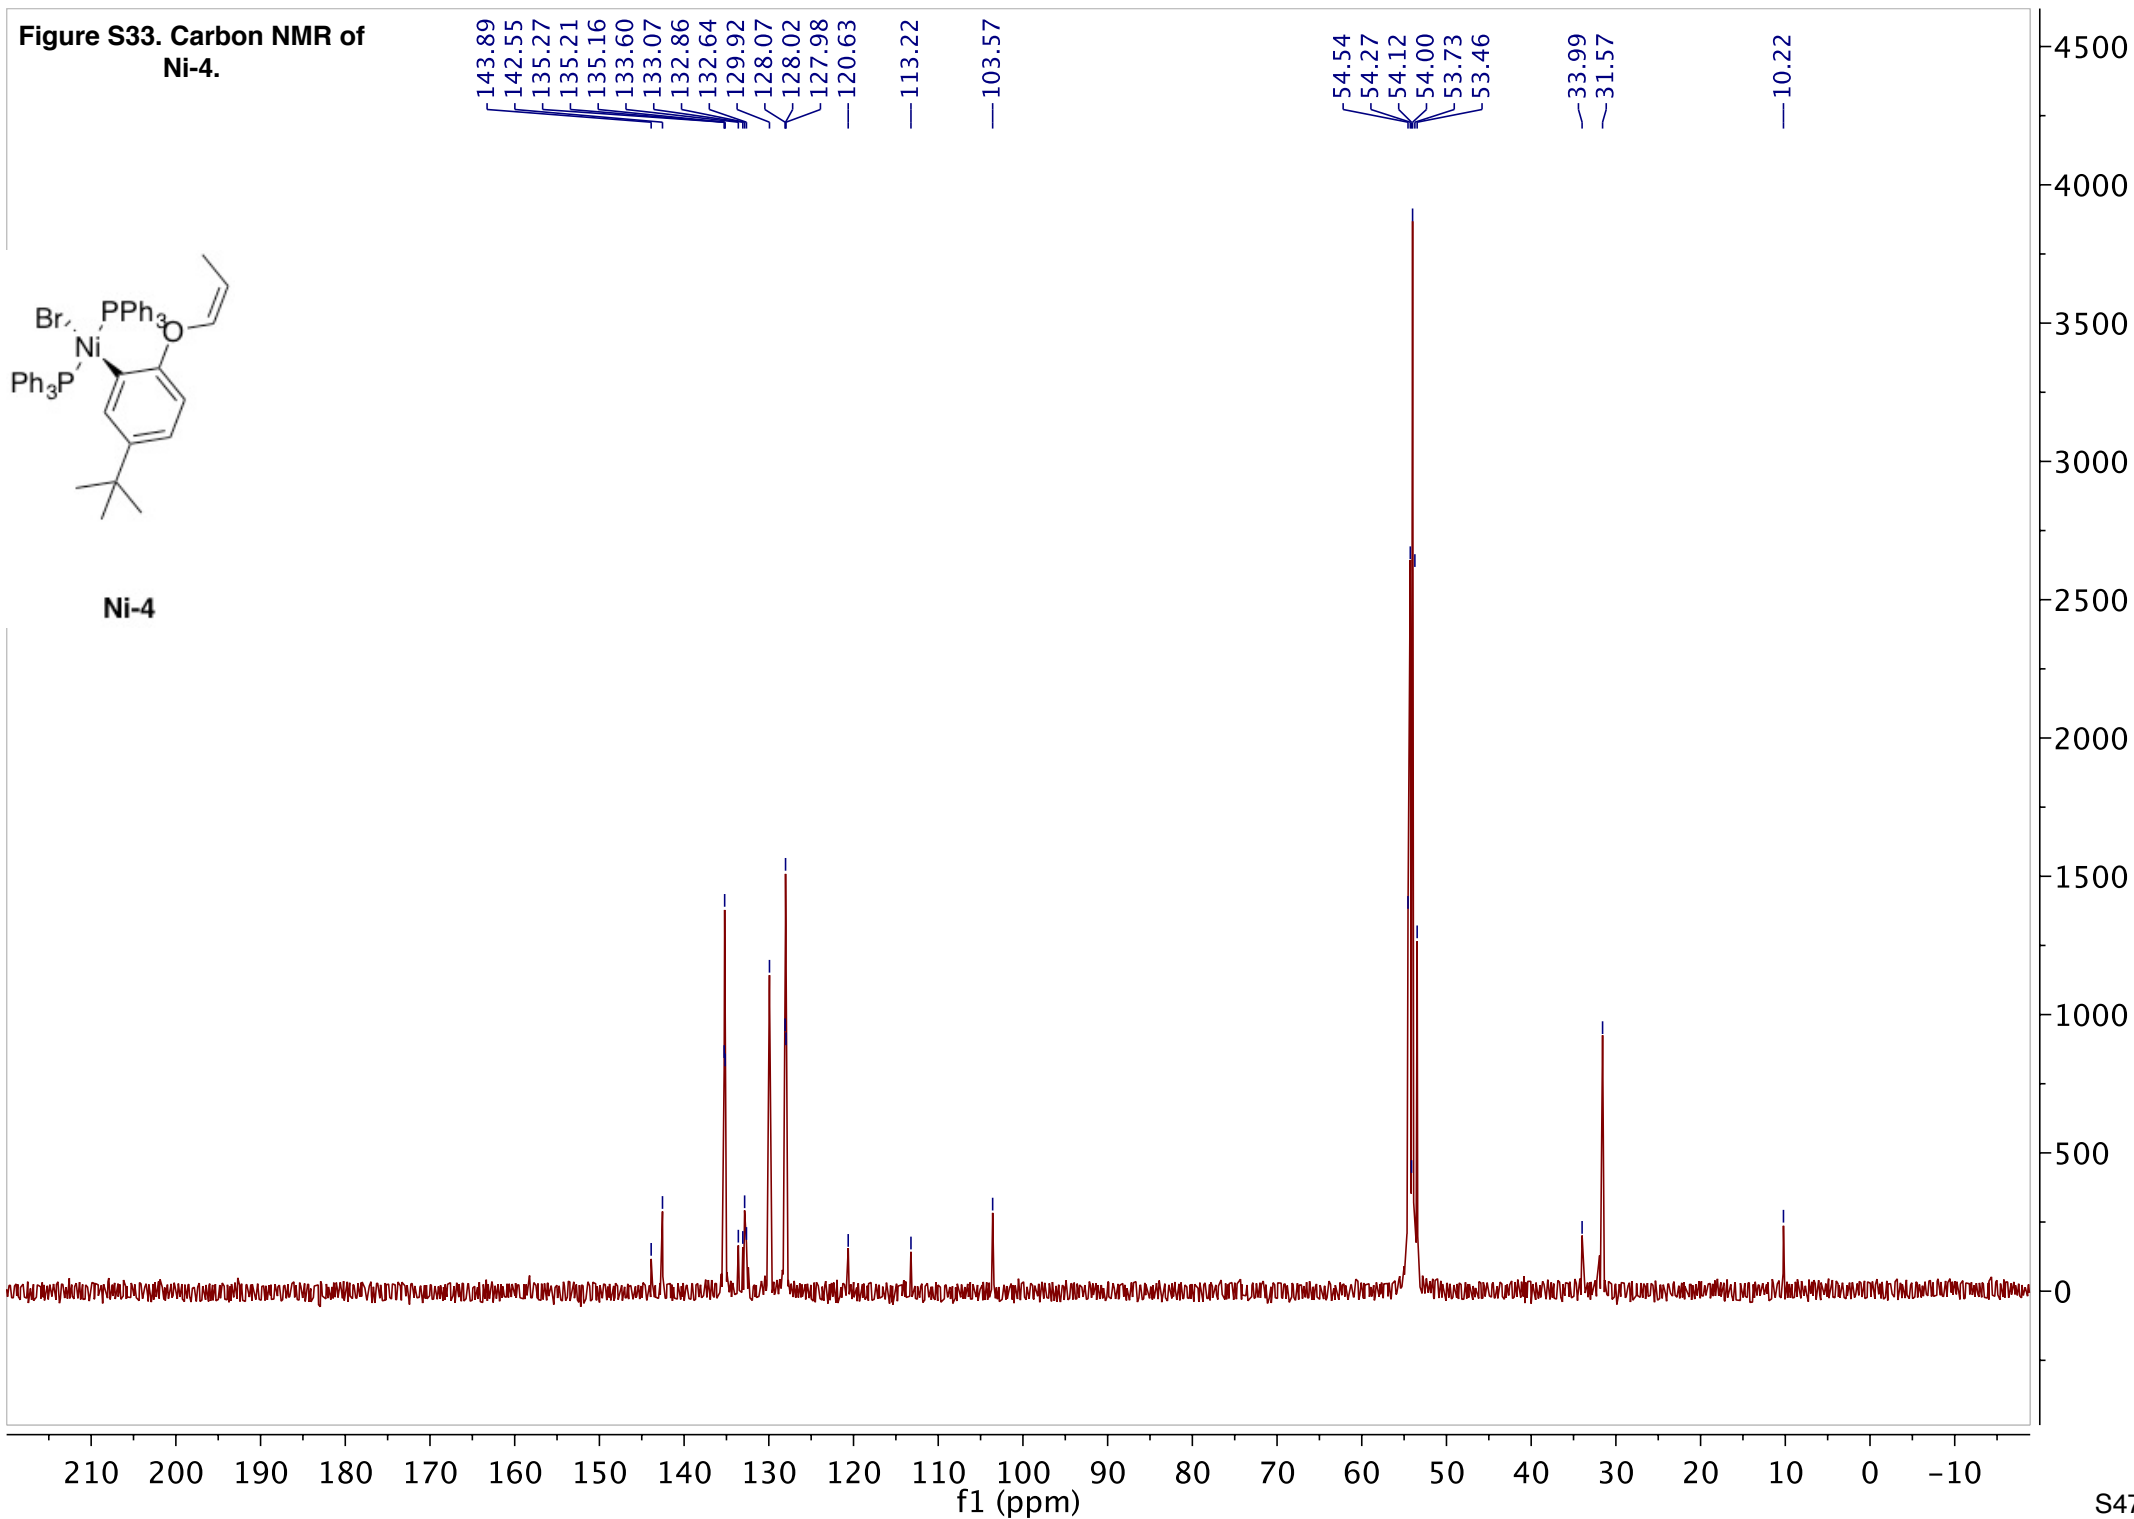

Figure S34. Phosphorus NMR of Ni-4.

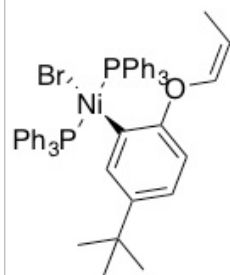

Ni-4

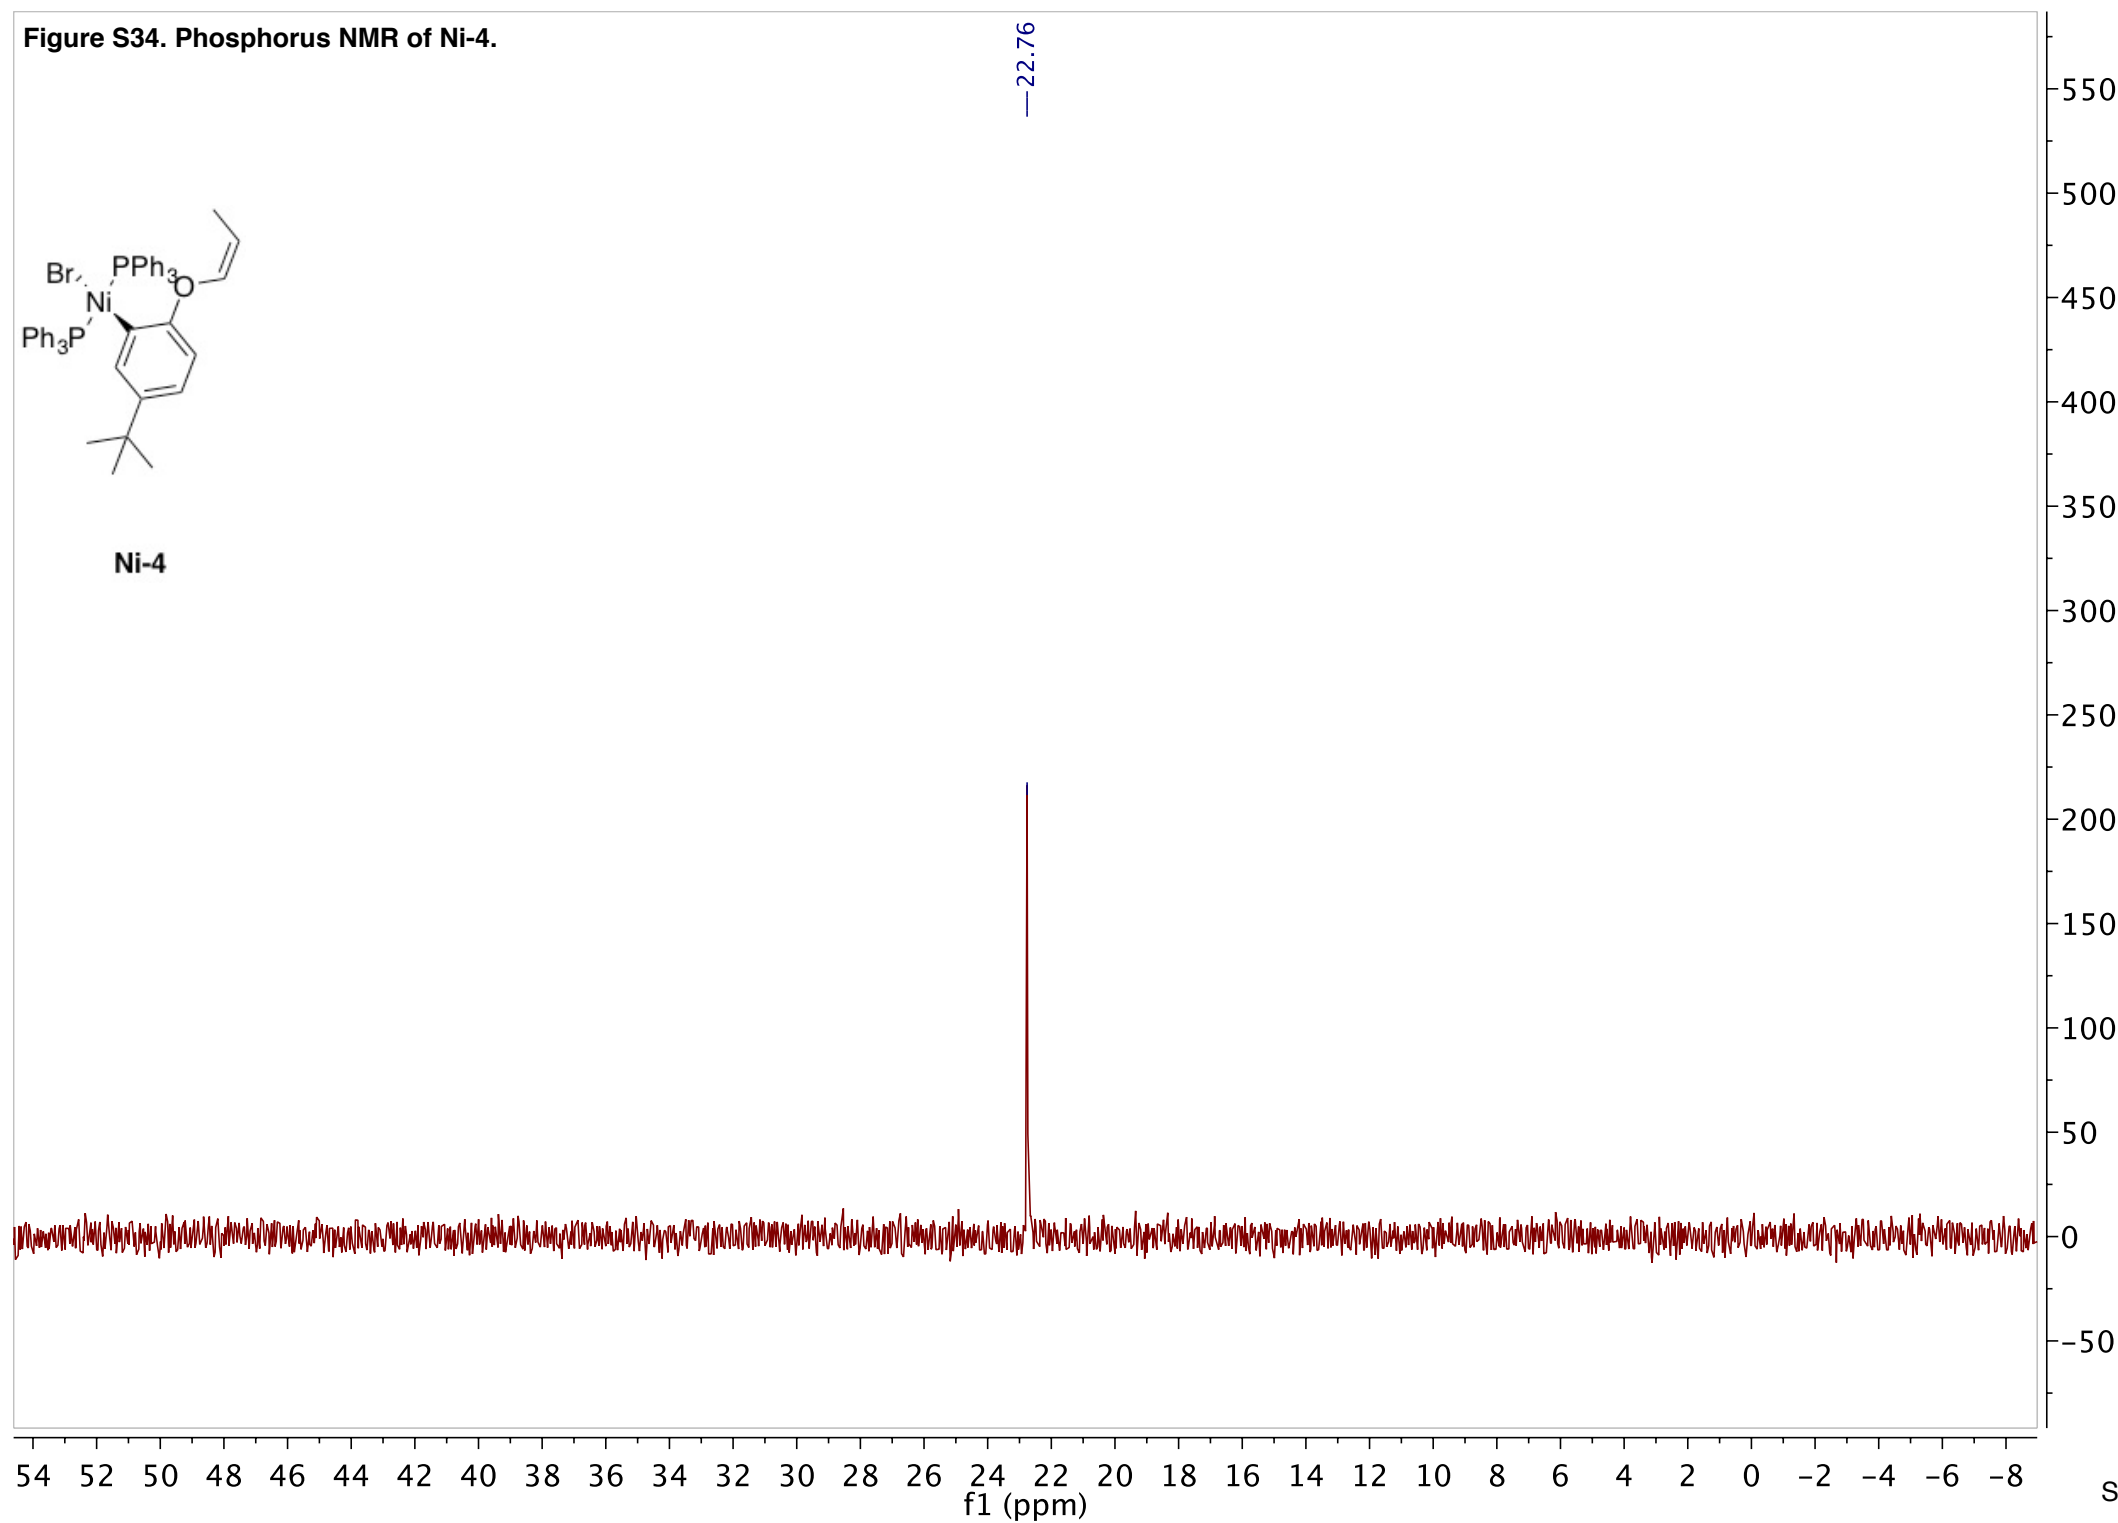

Figure S35. Proton NMR of Ni-5a.

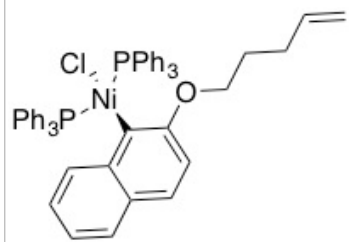

Ni-5a

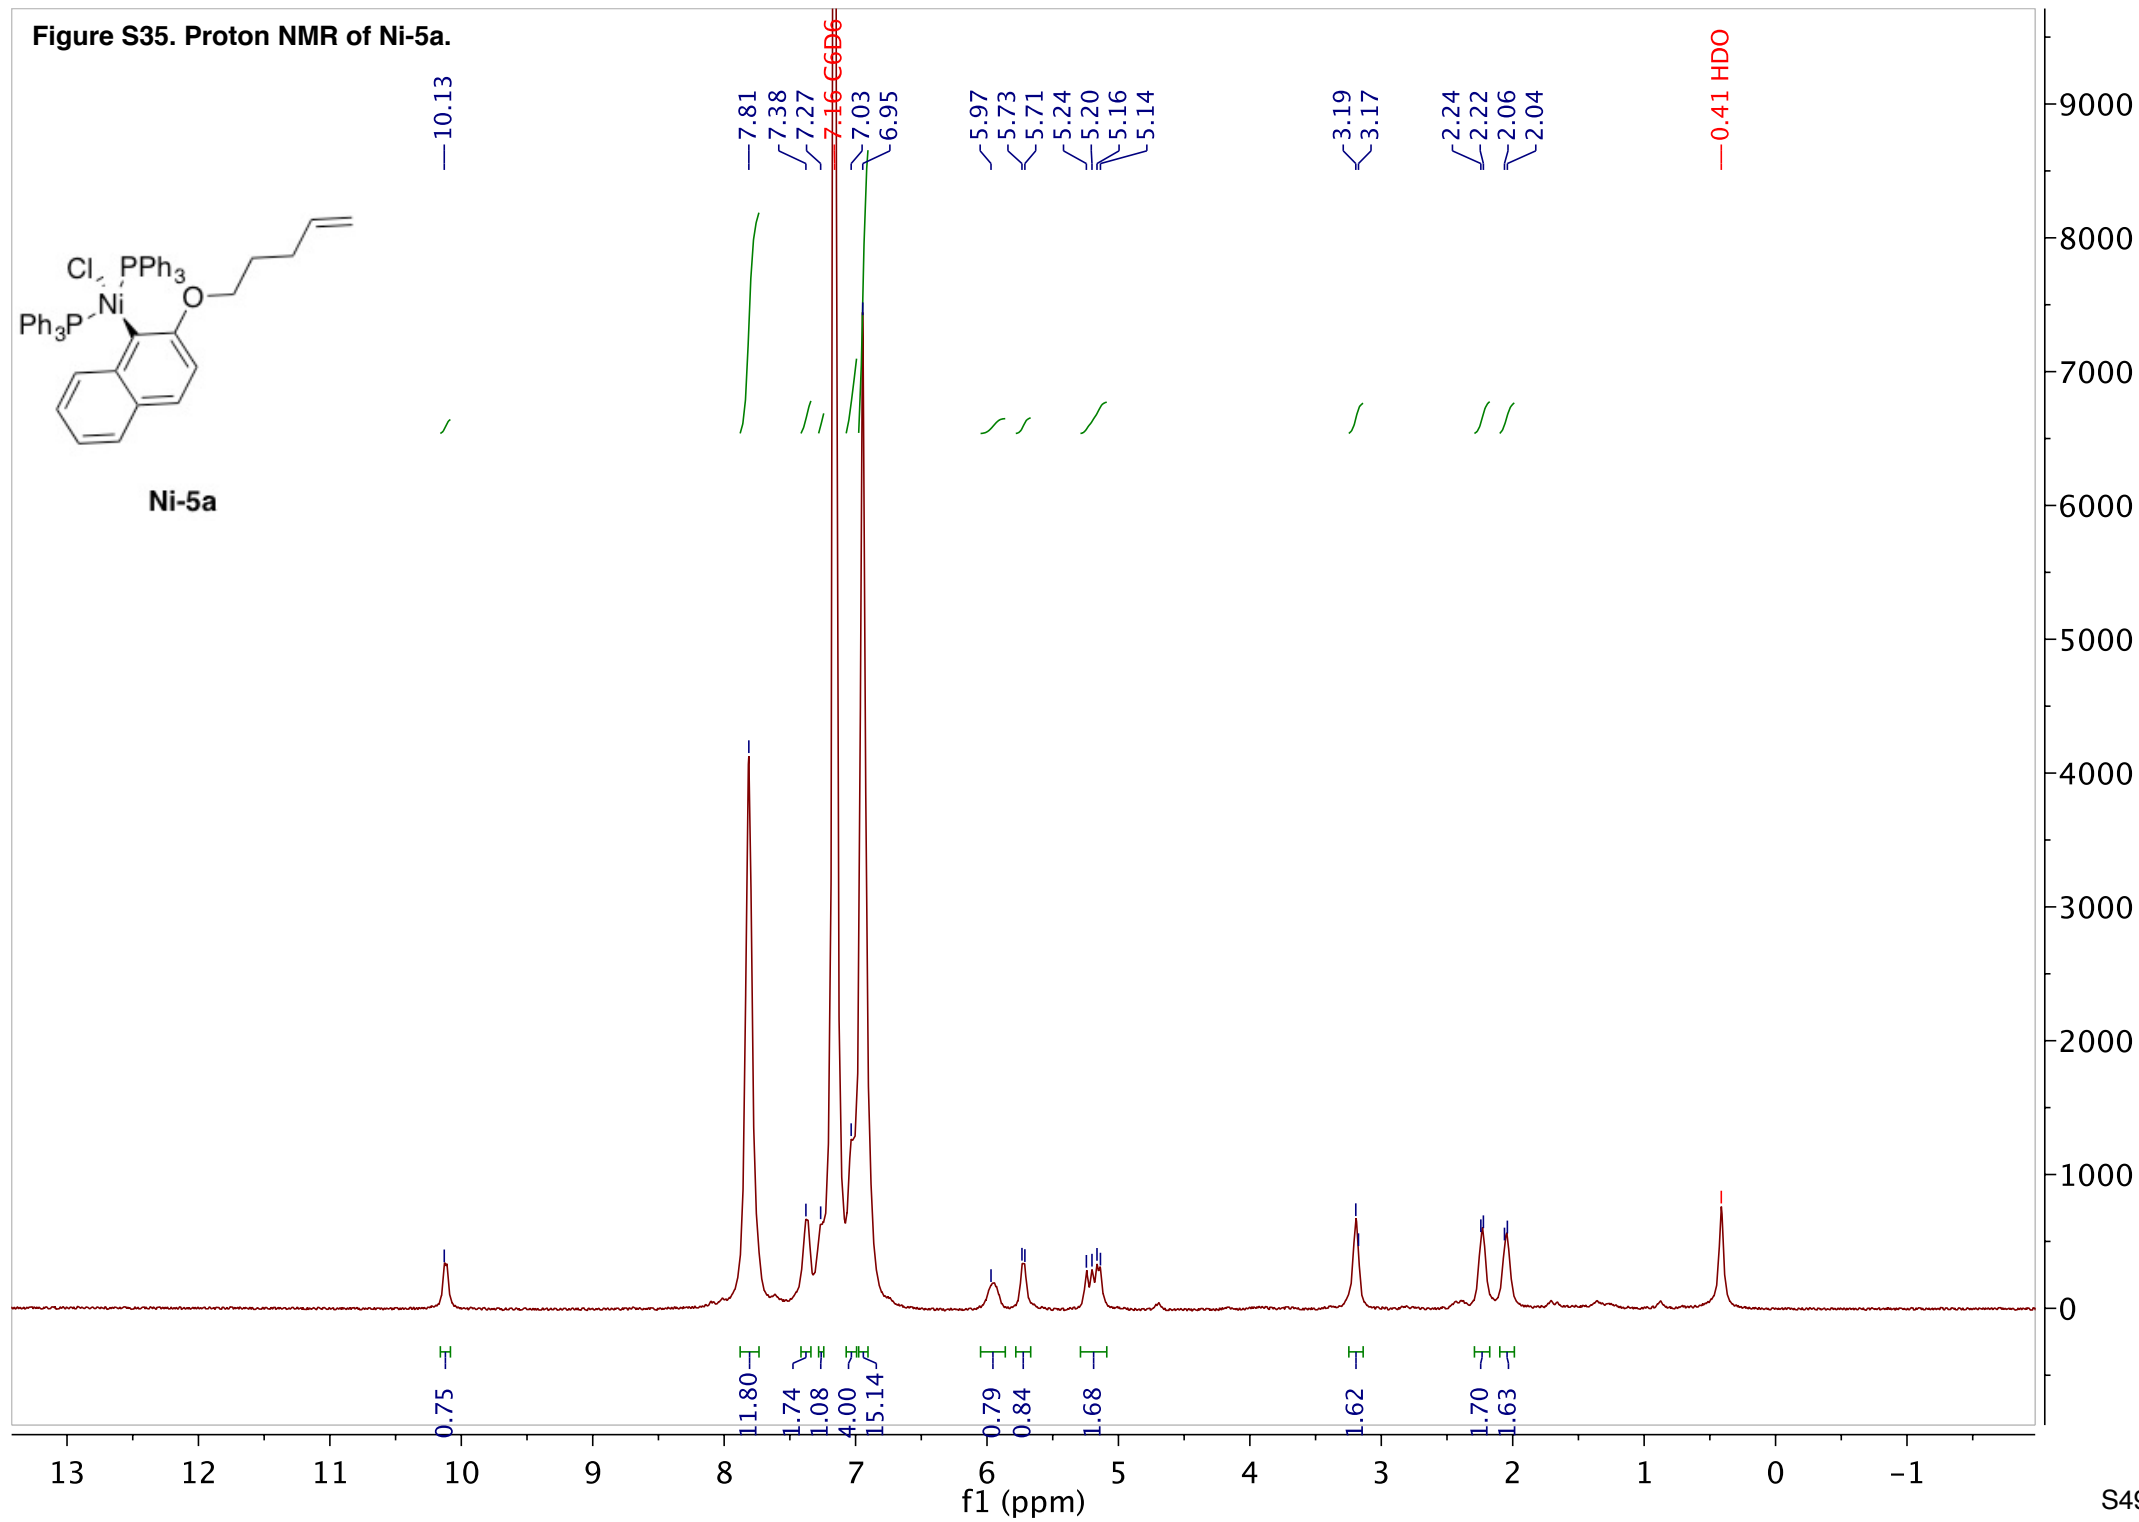

Figure S36. Carbon NMR  
of Ni-5a.

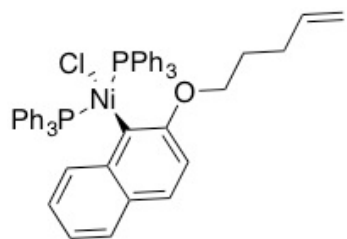

Ni-5a

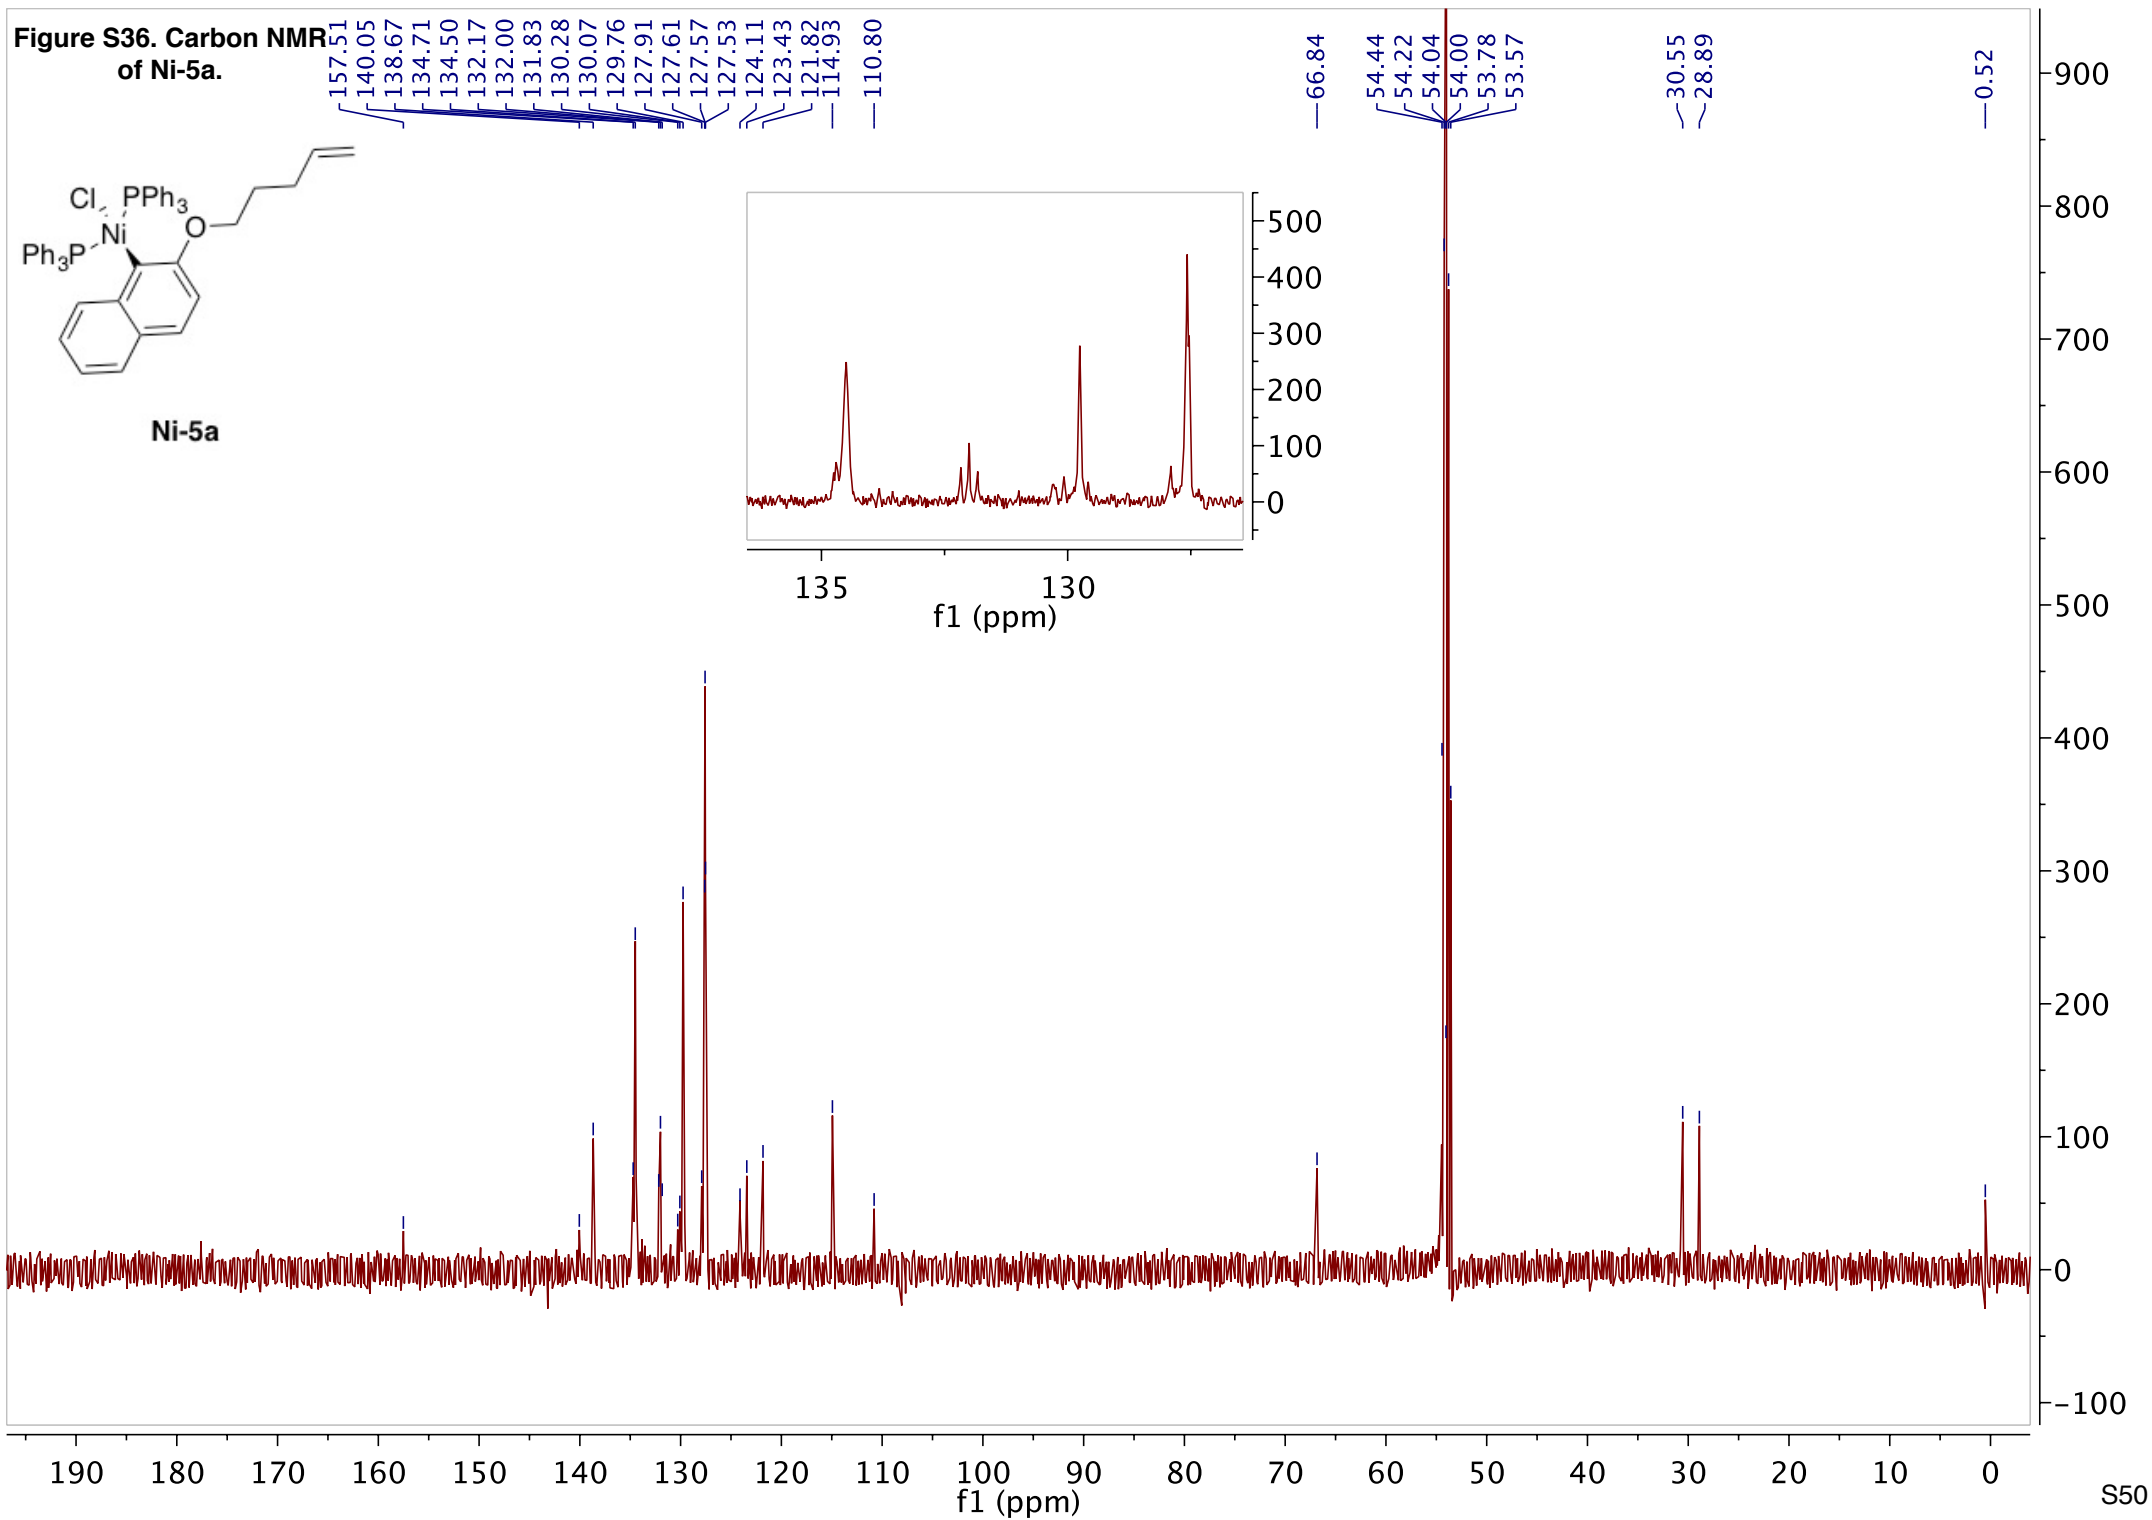

Figure S37. Phosphorus NMR of Ni-5a.

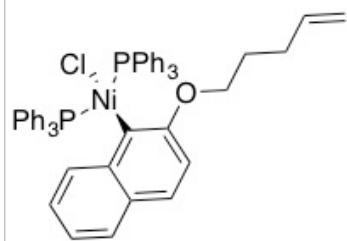

Ni-5a

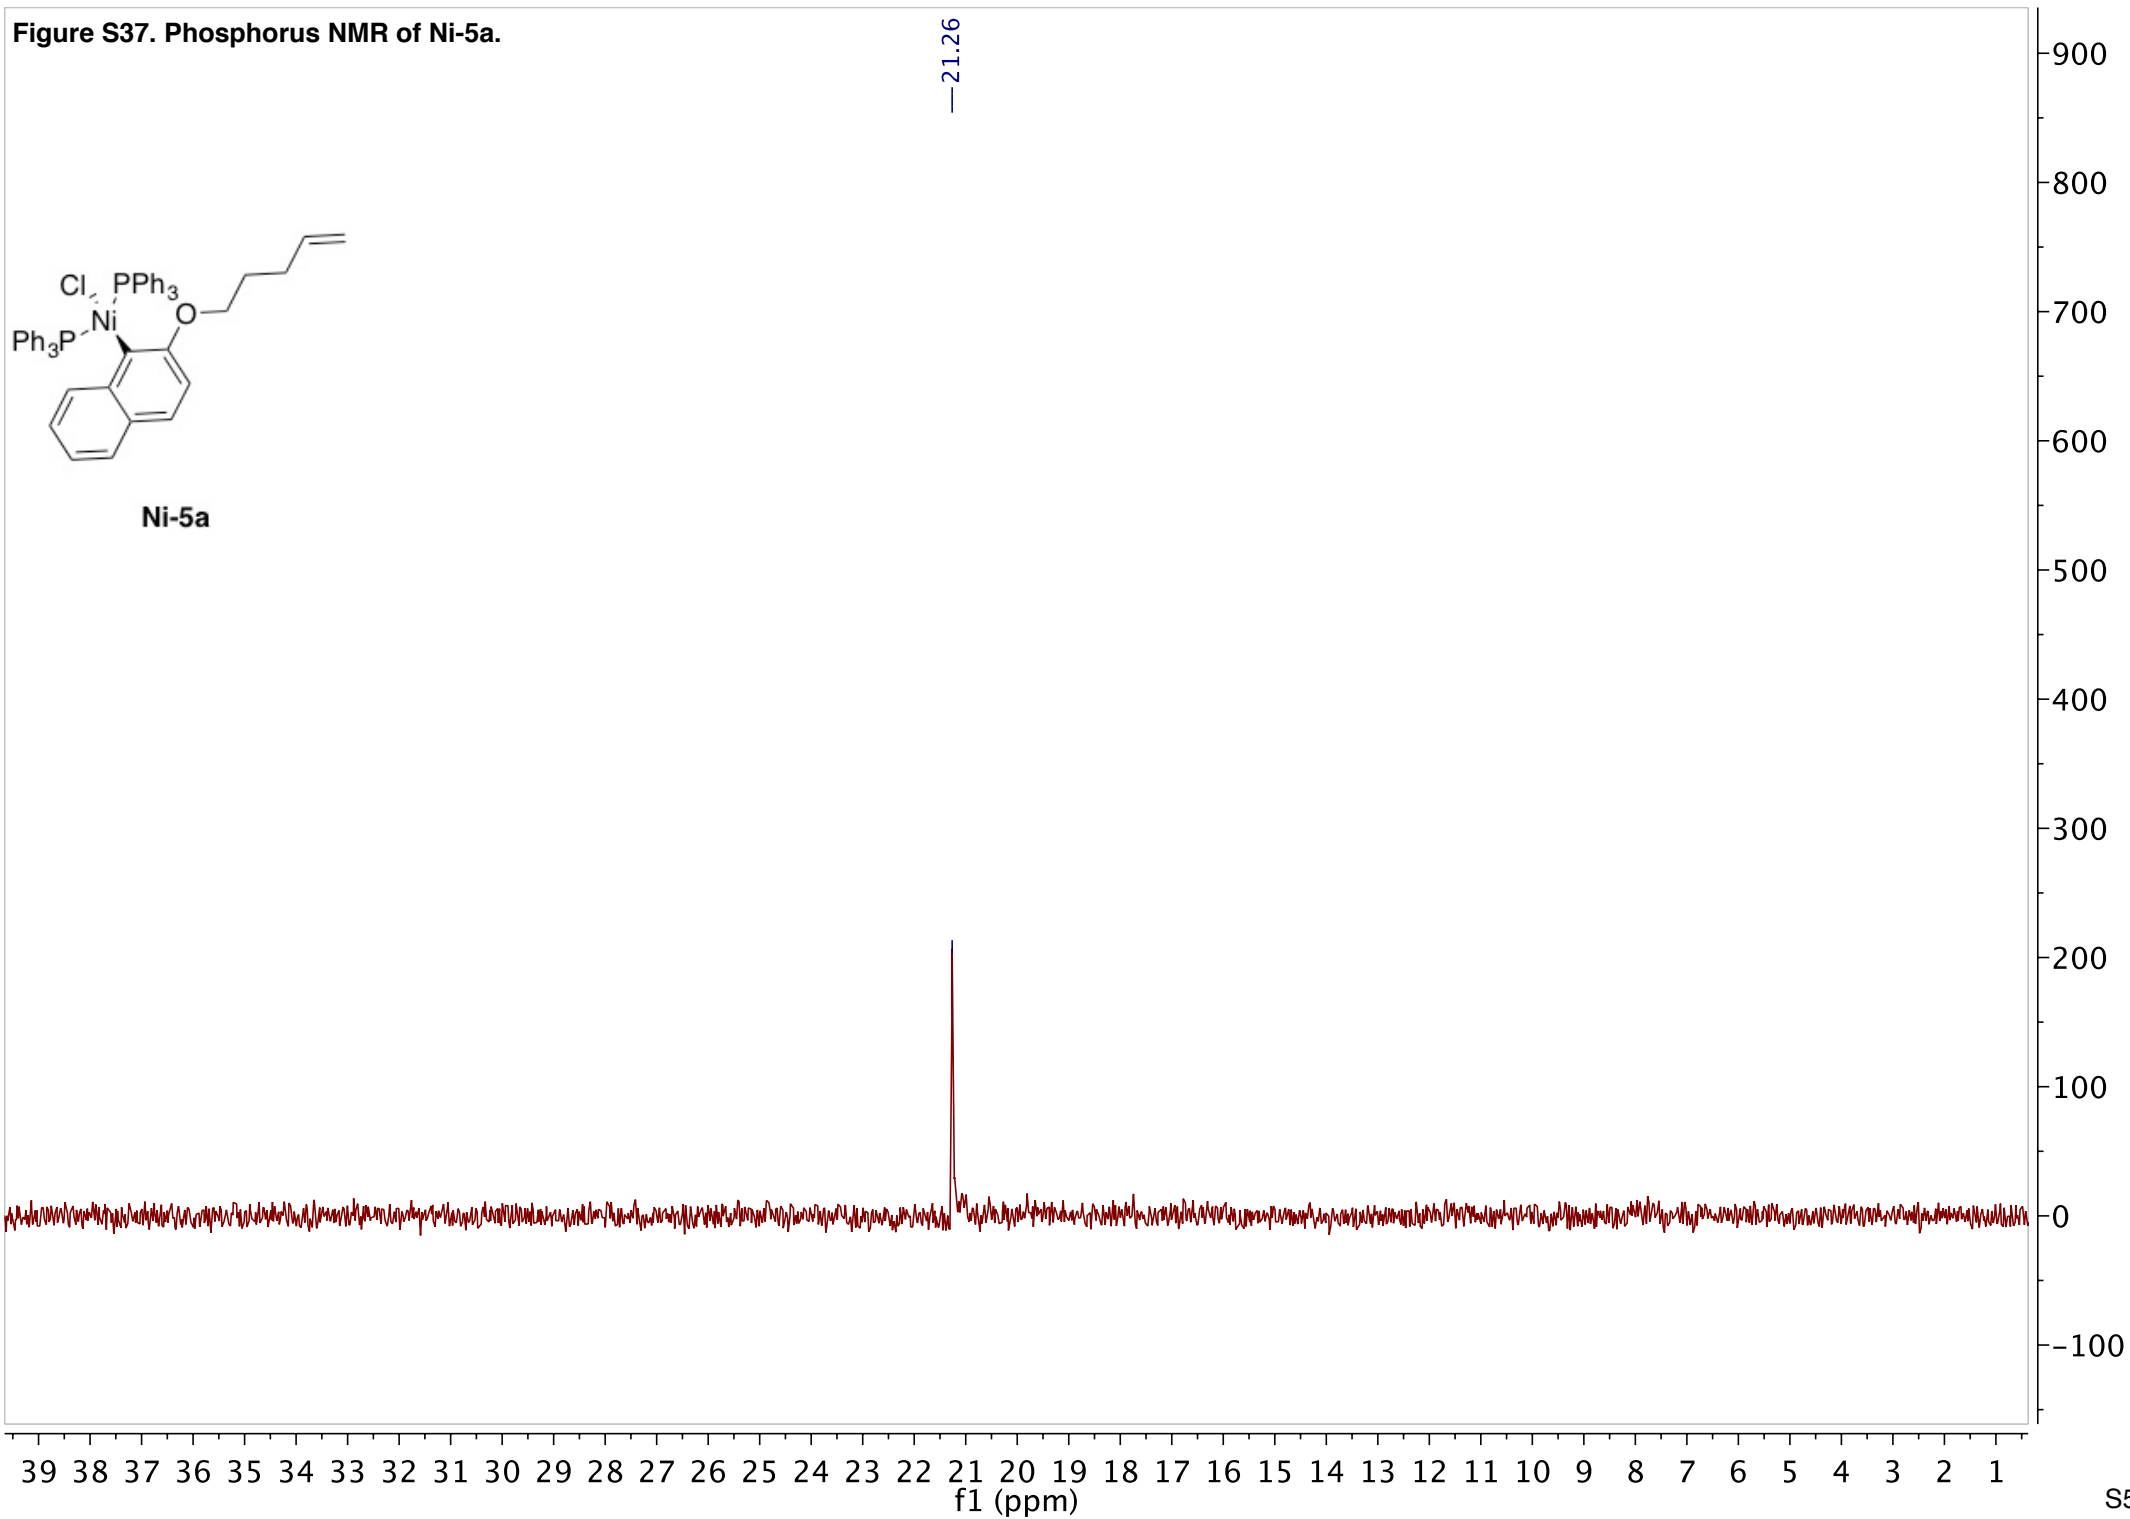

Figure S38. Proton NMR of Ni-5b.

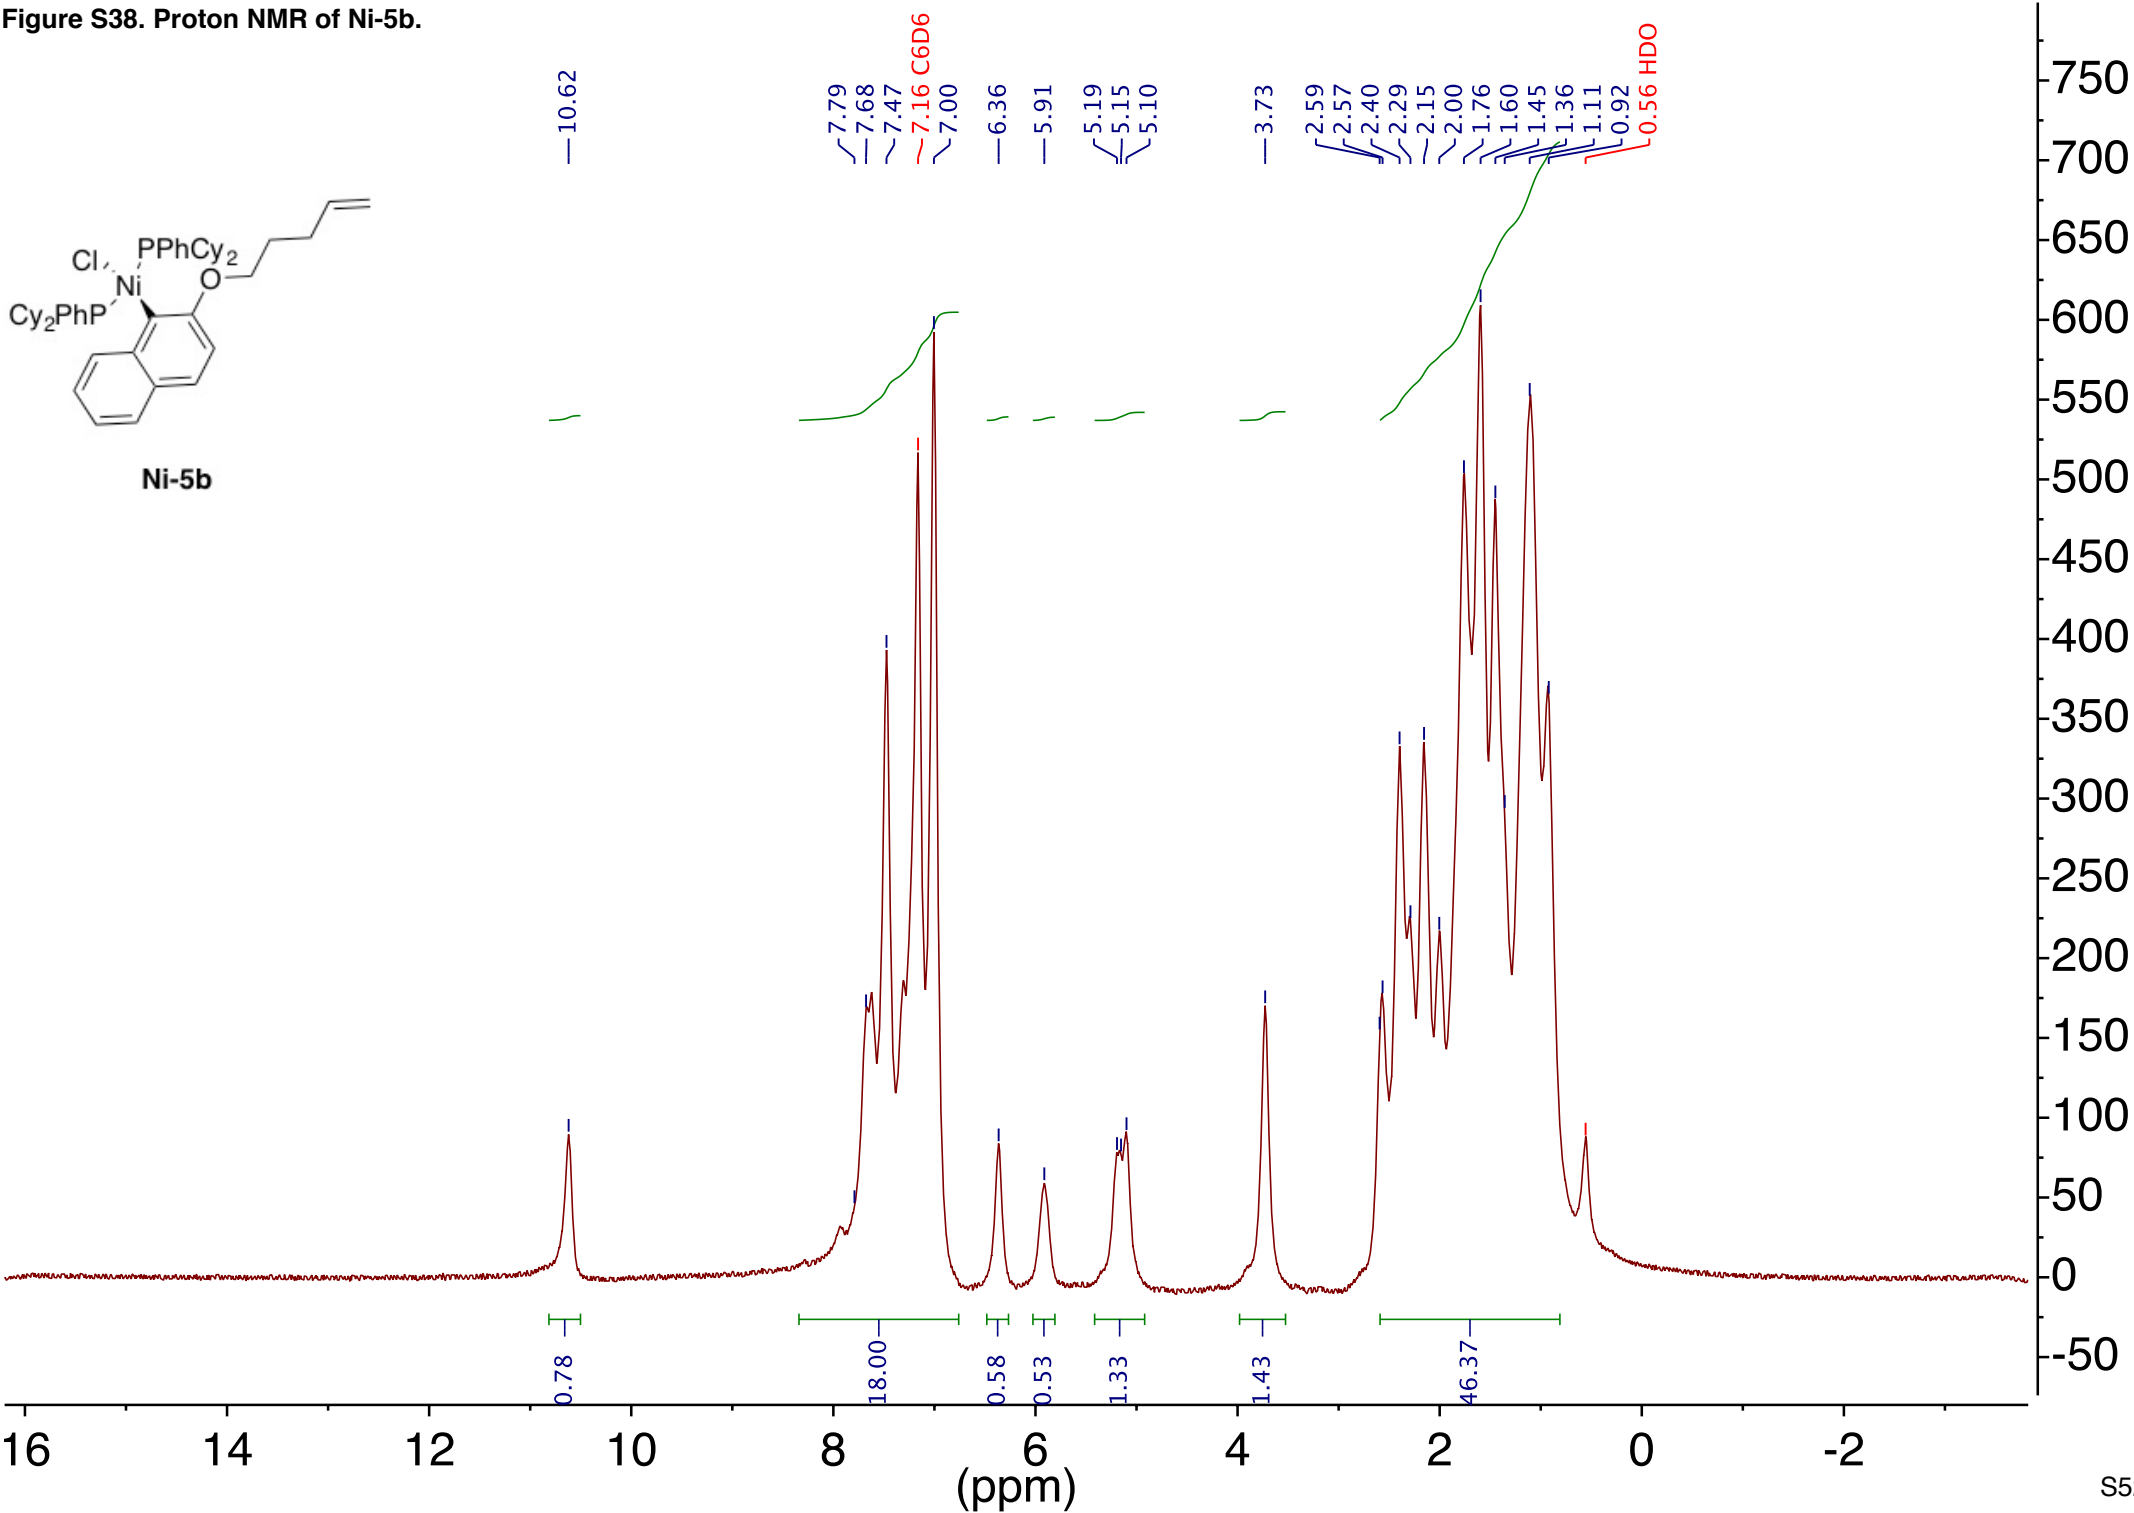



Figure S39. Phosphorus NMR of Ni-5b.

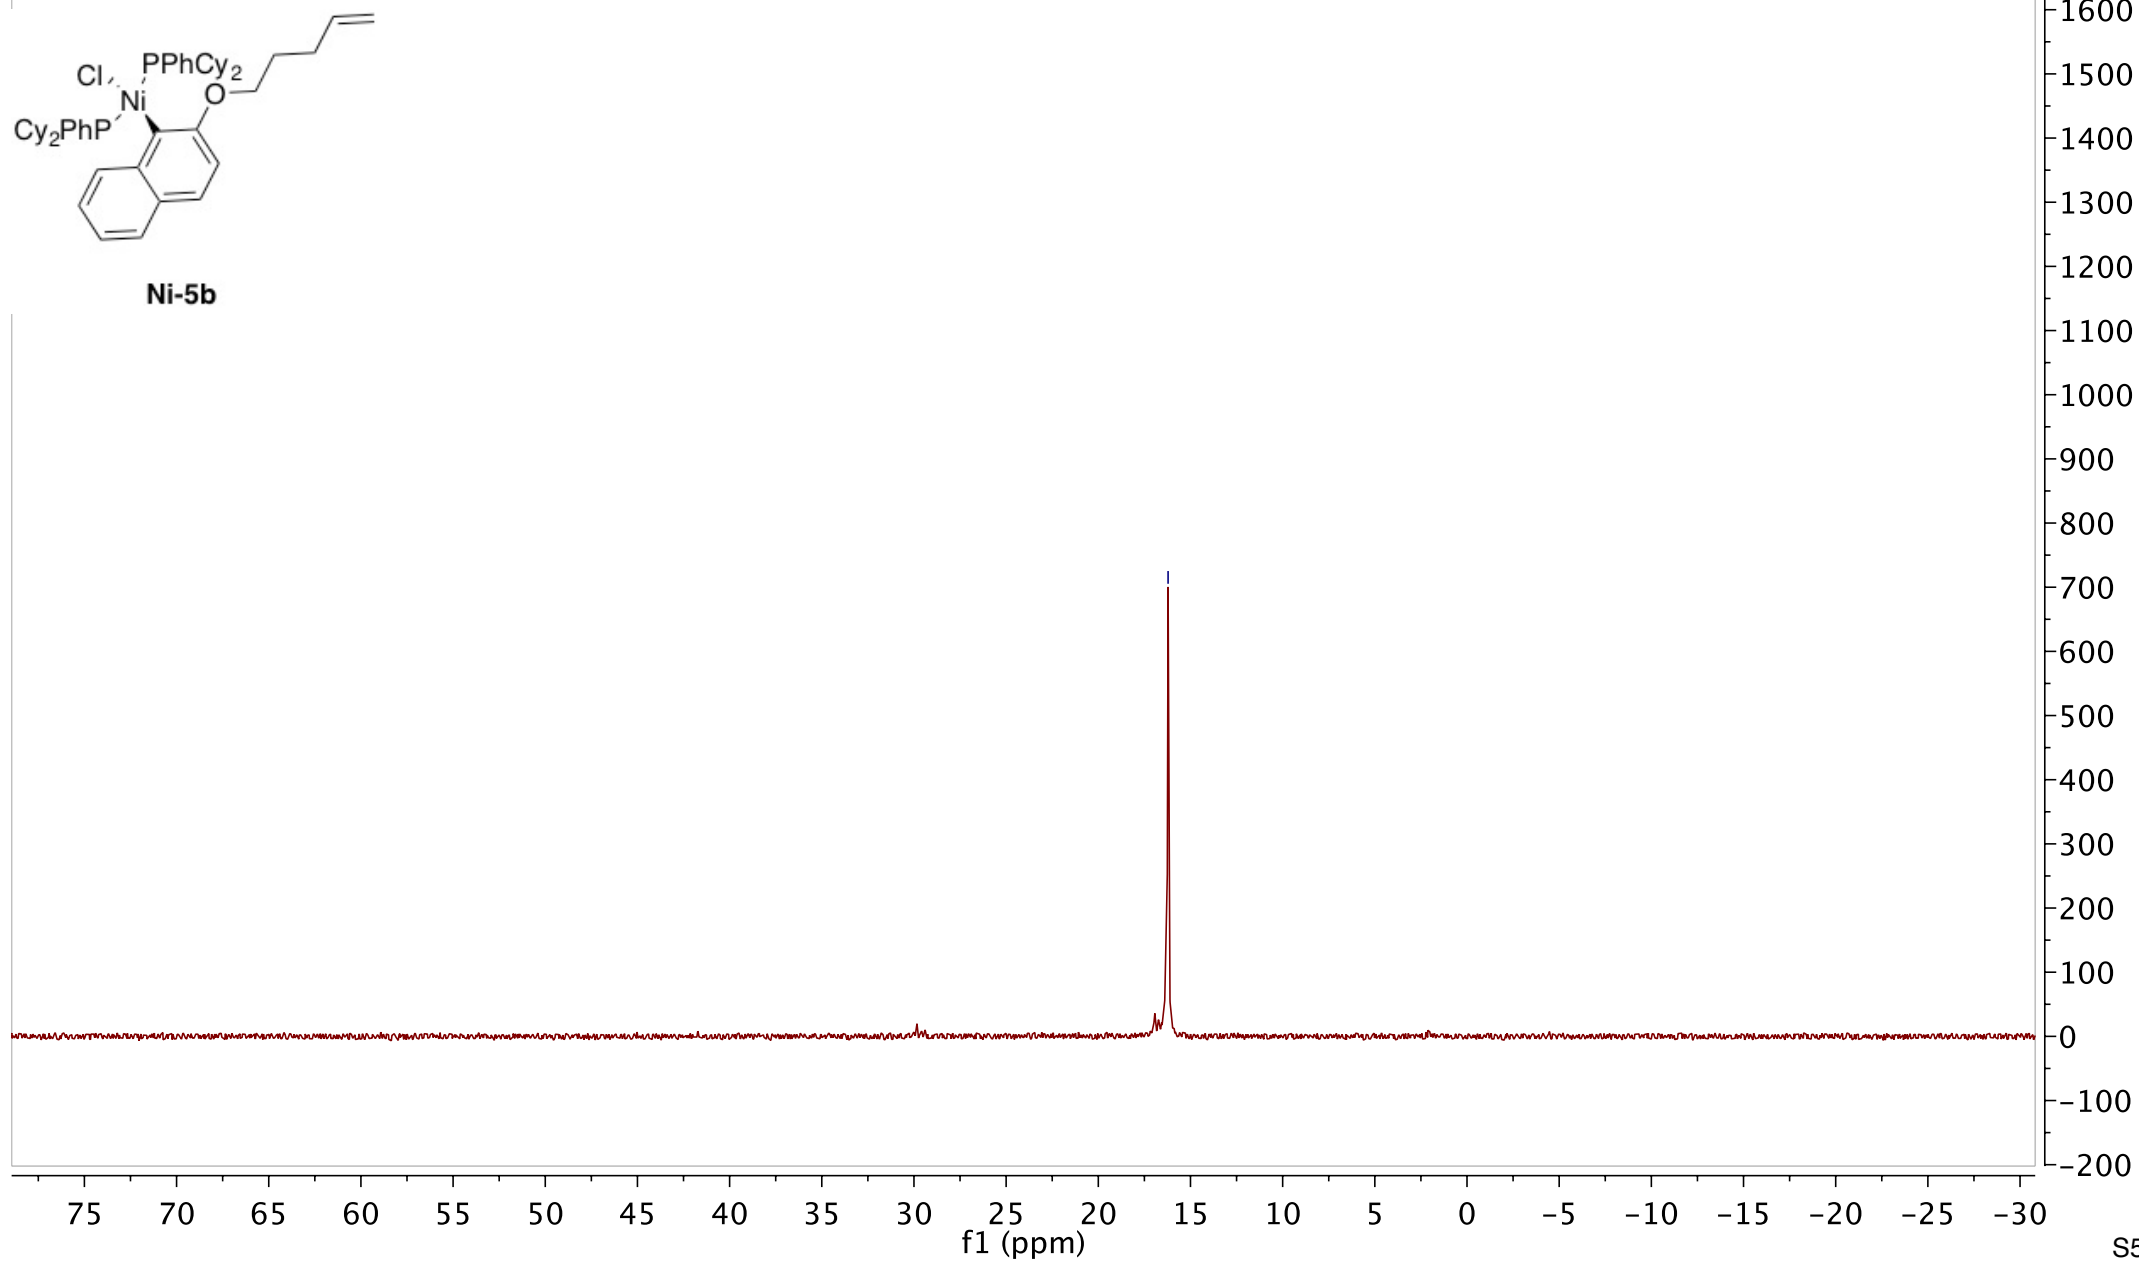

**Figure S40. Carbon NMR of Ni-5b.**

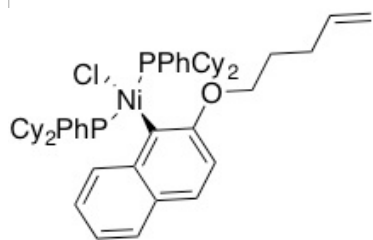

**Ni-5b**

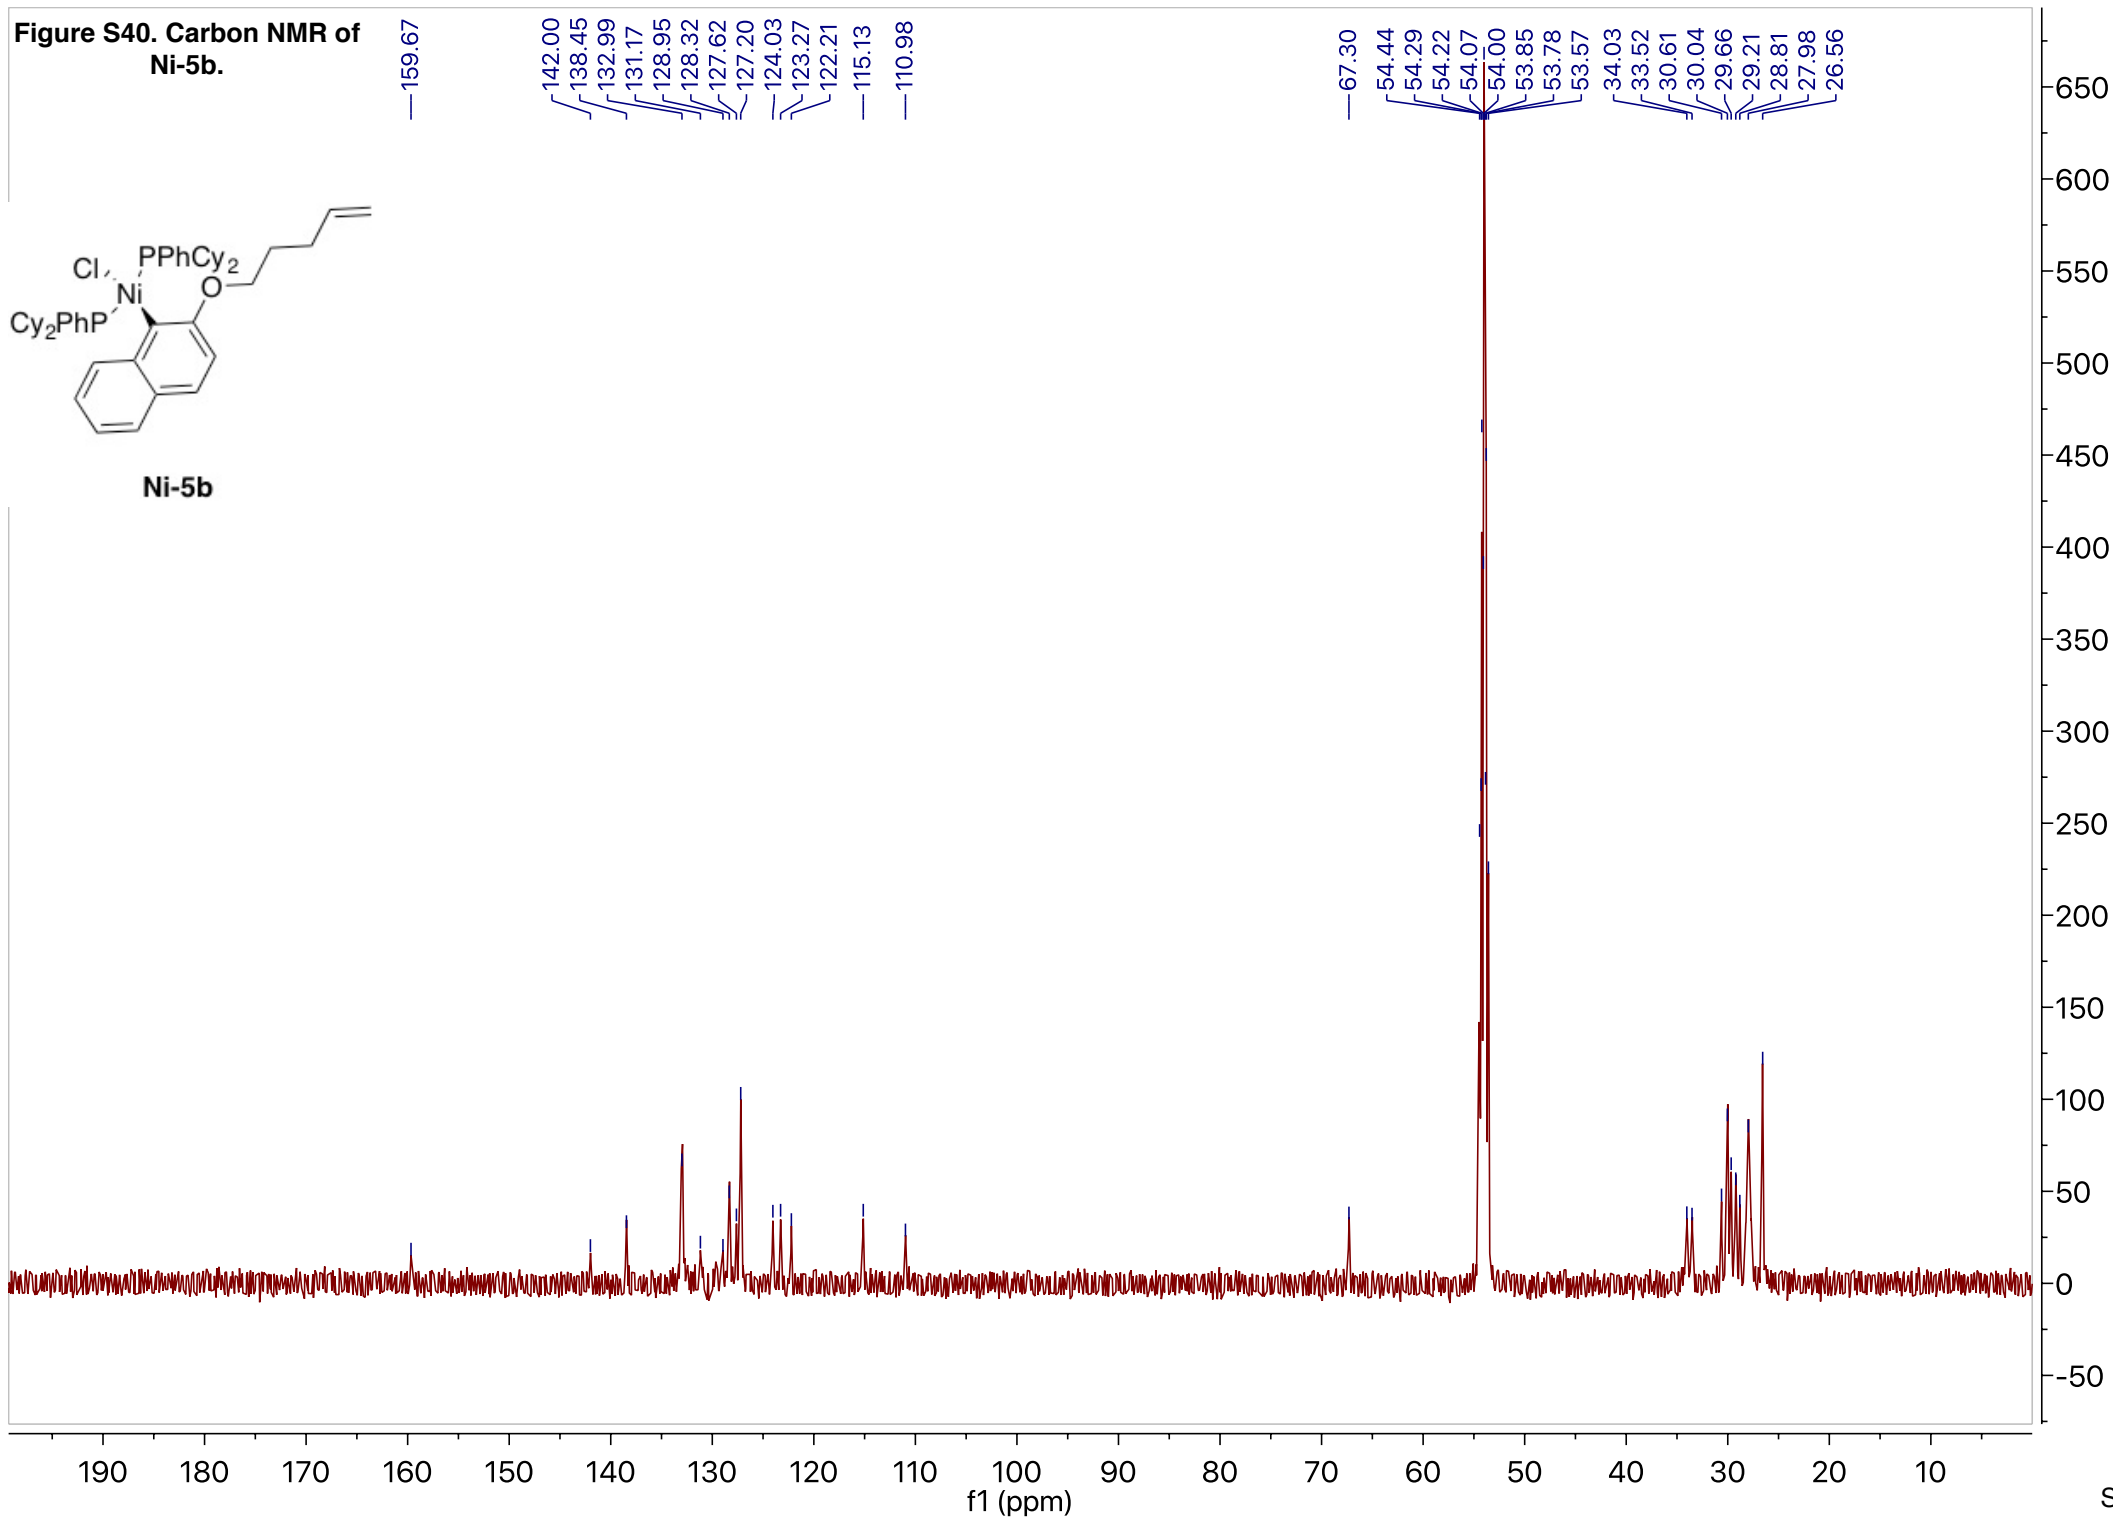

Figure S41. Proton NMR of Ni-6.

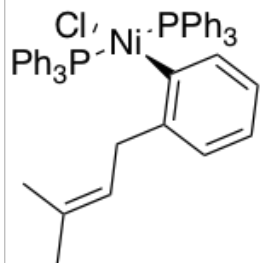

Ni-6

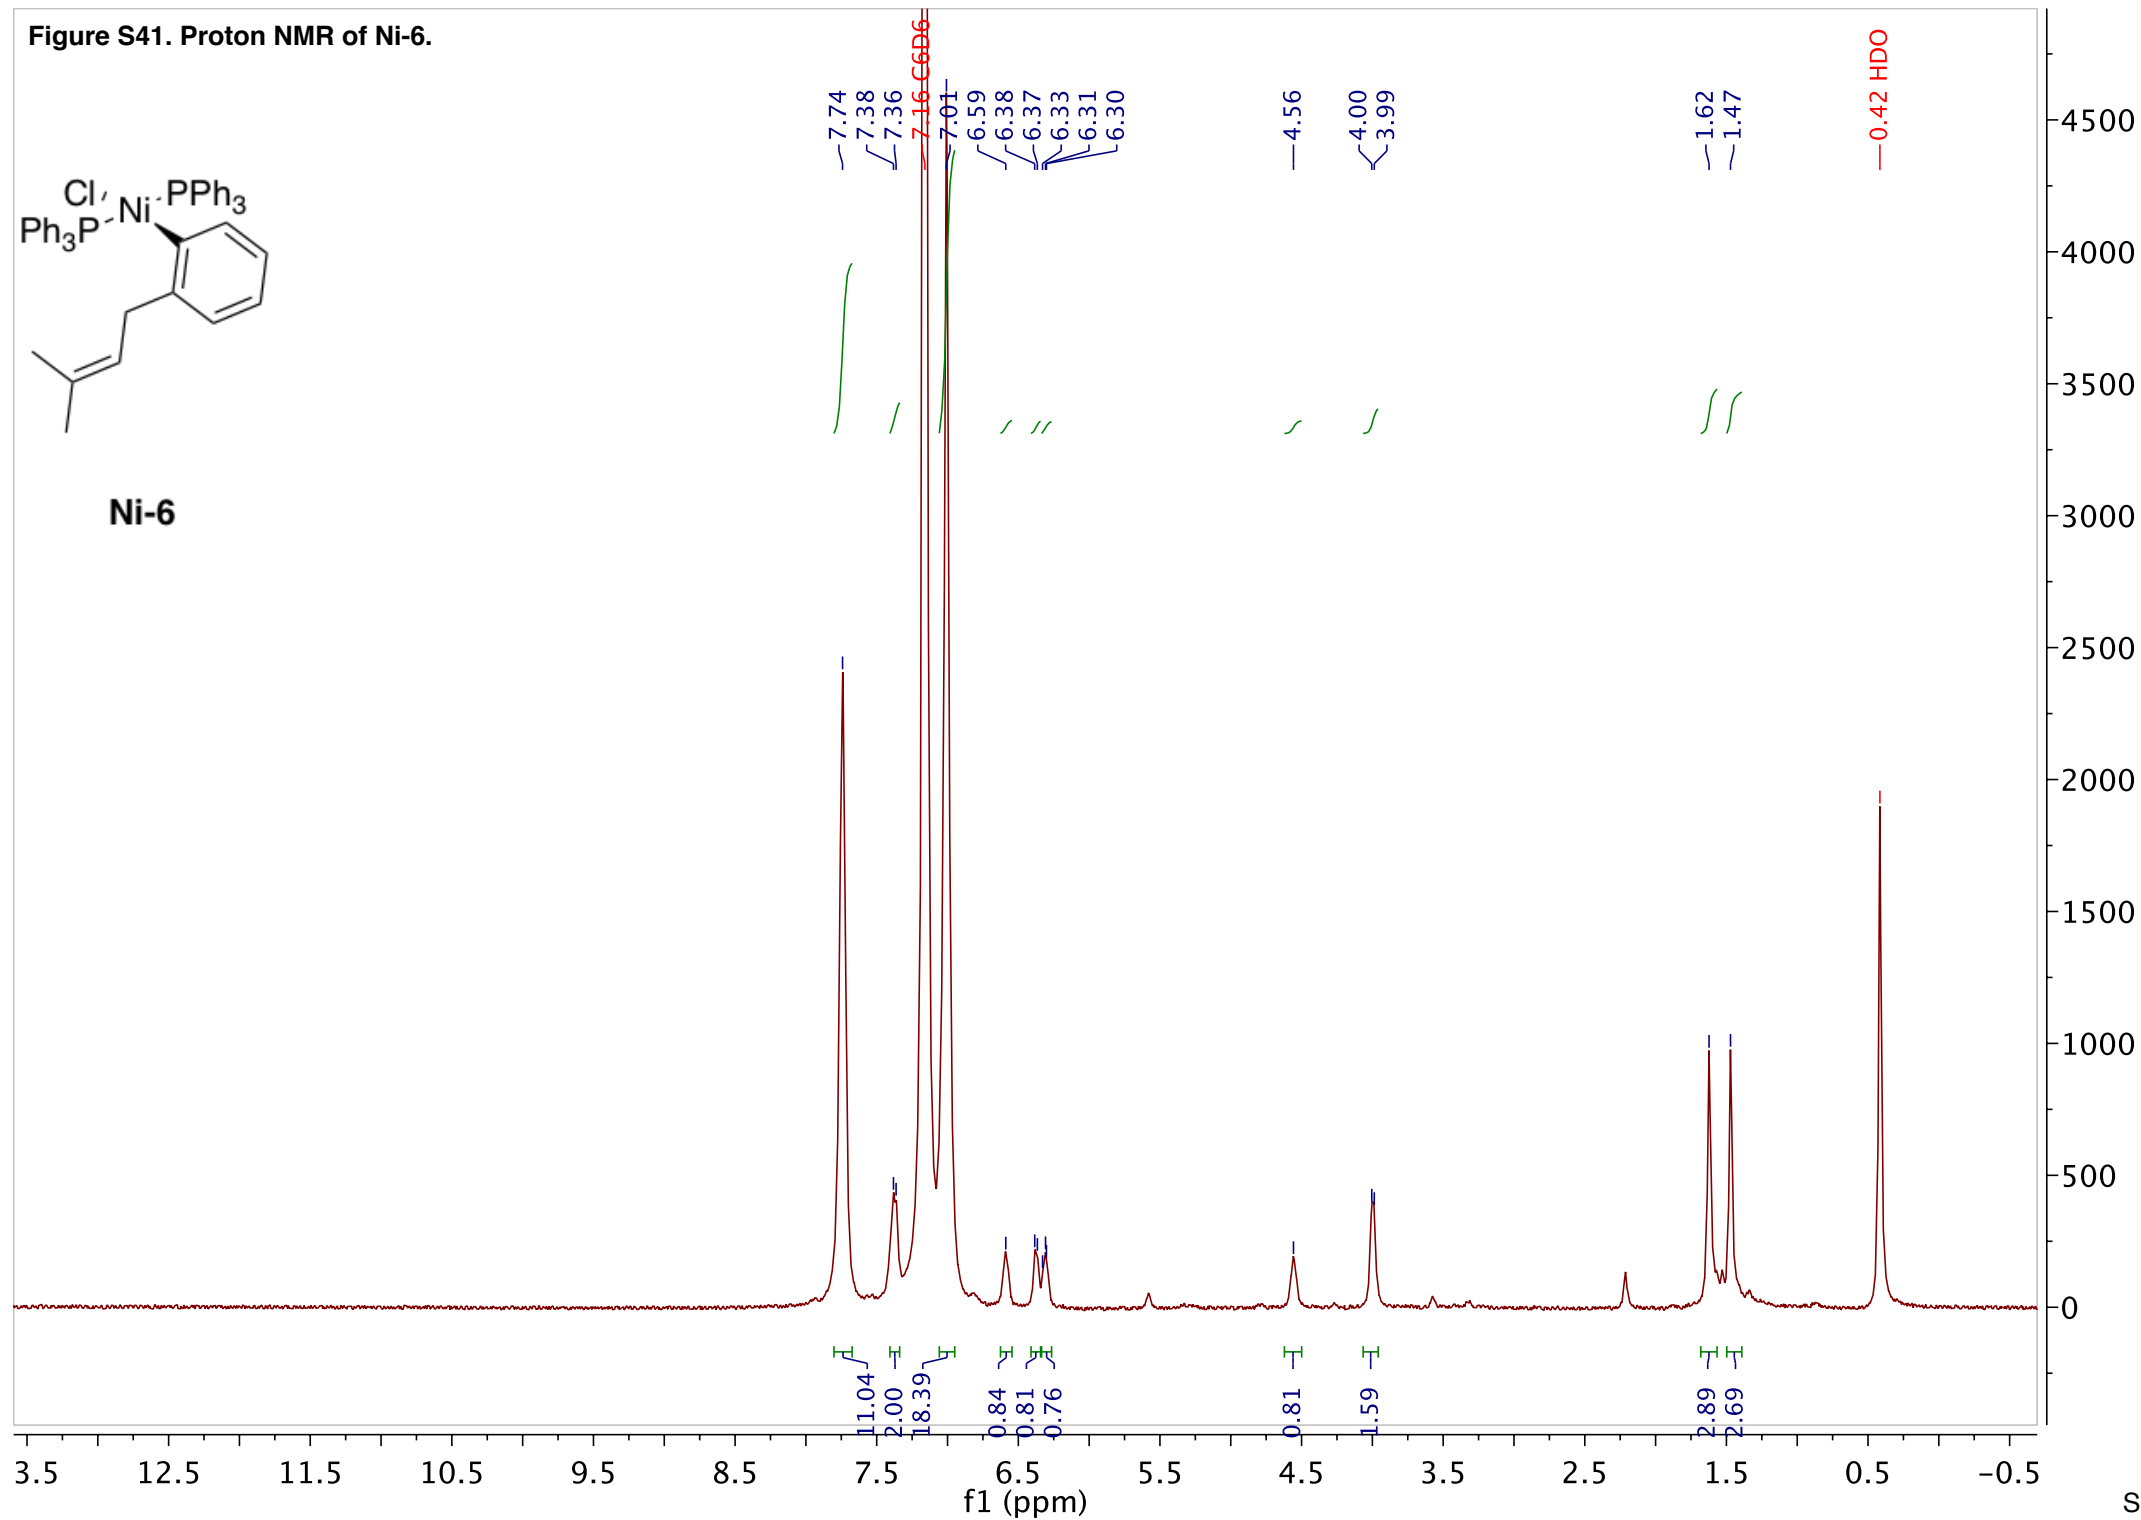

Figure S42. Carbon NMR of Ni-6.

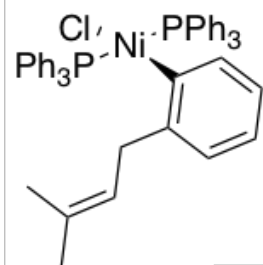

Ni-6

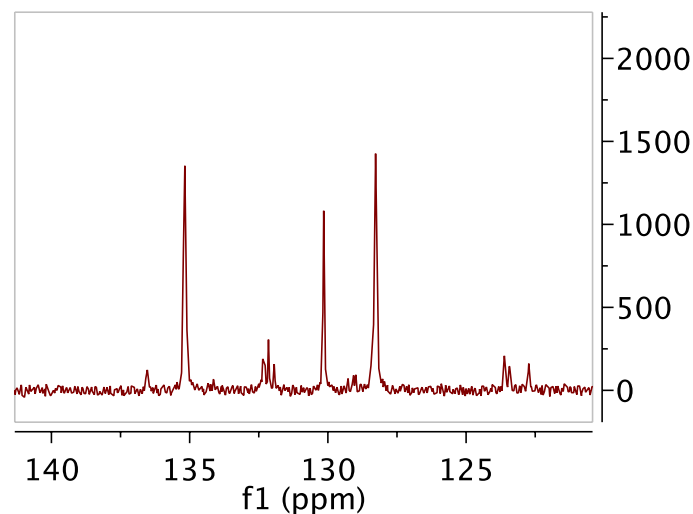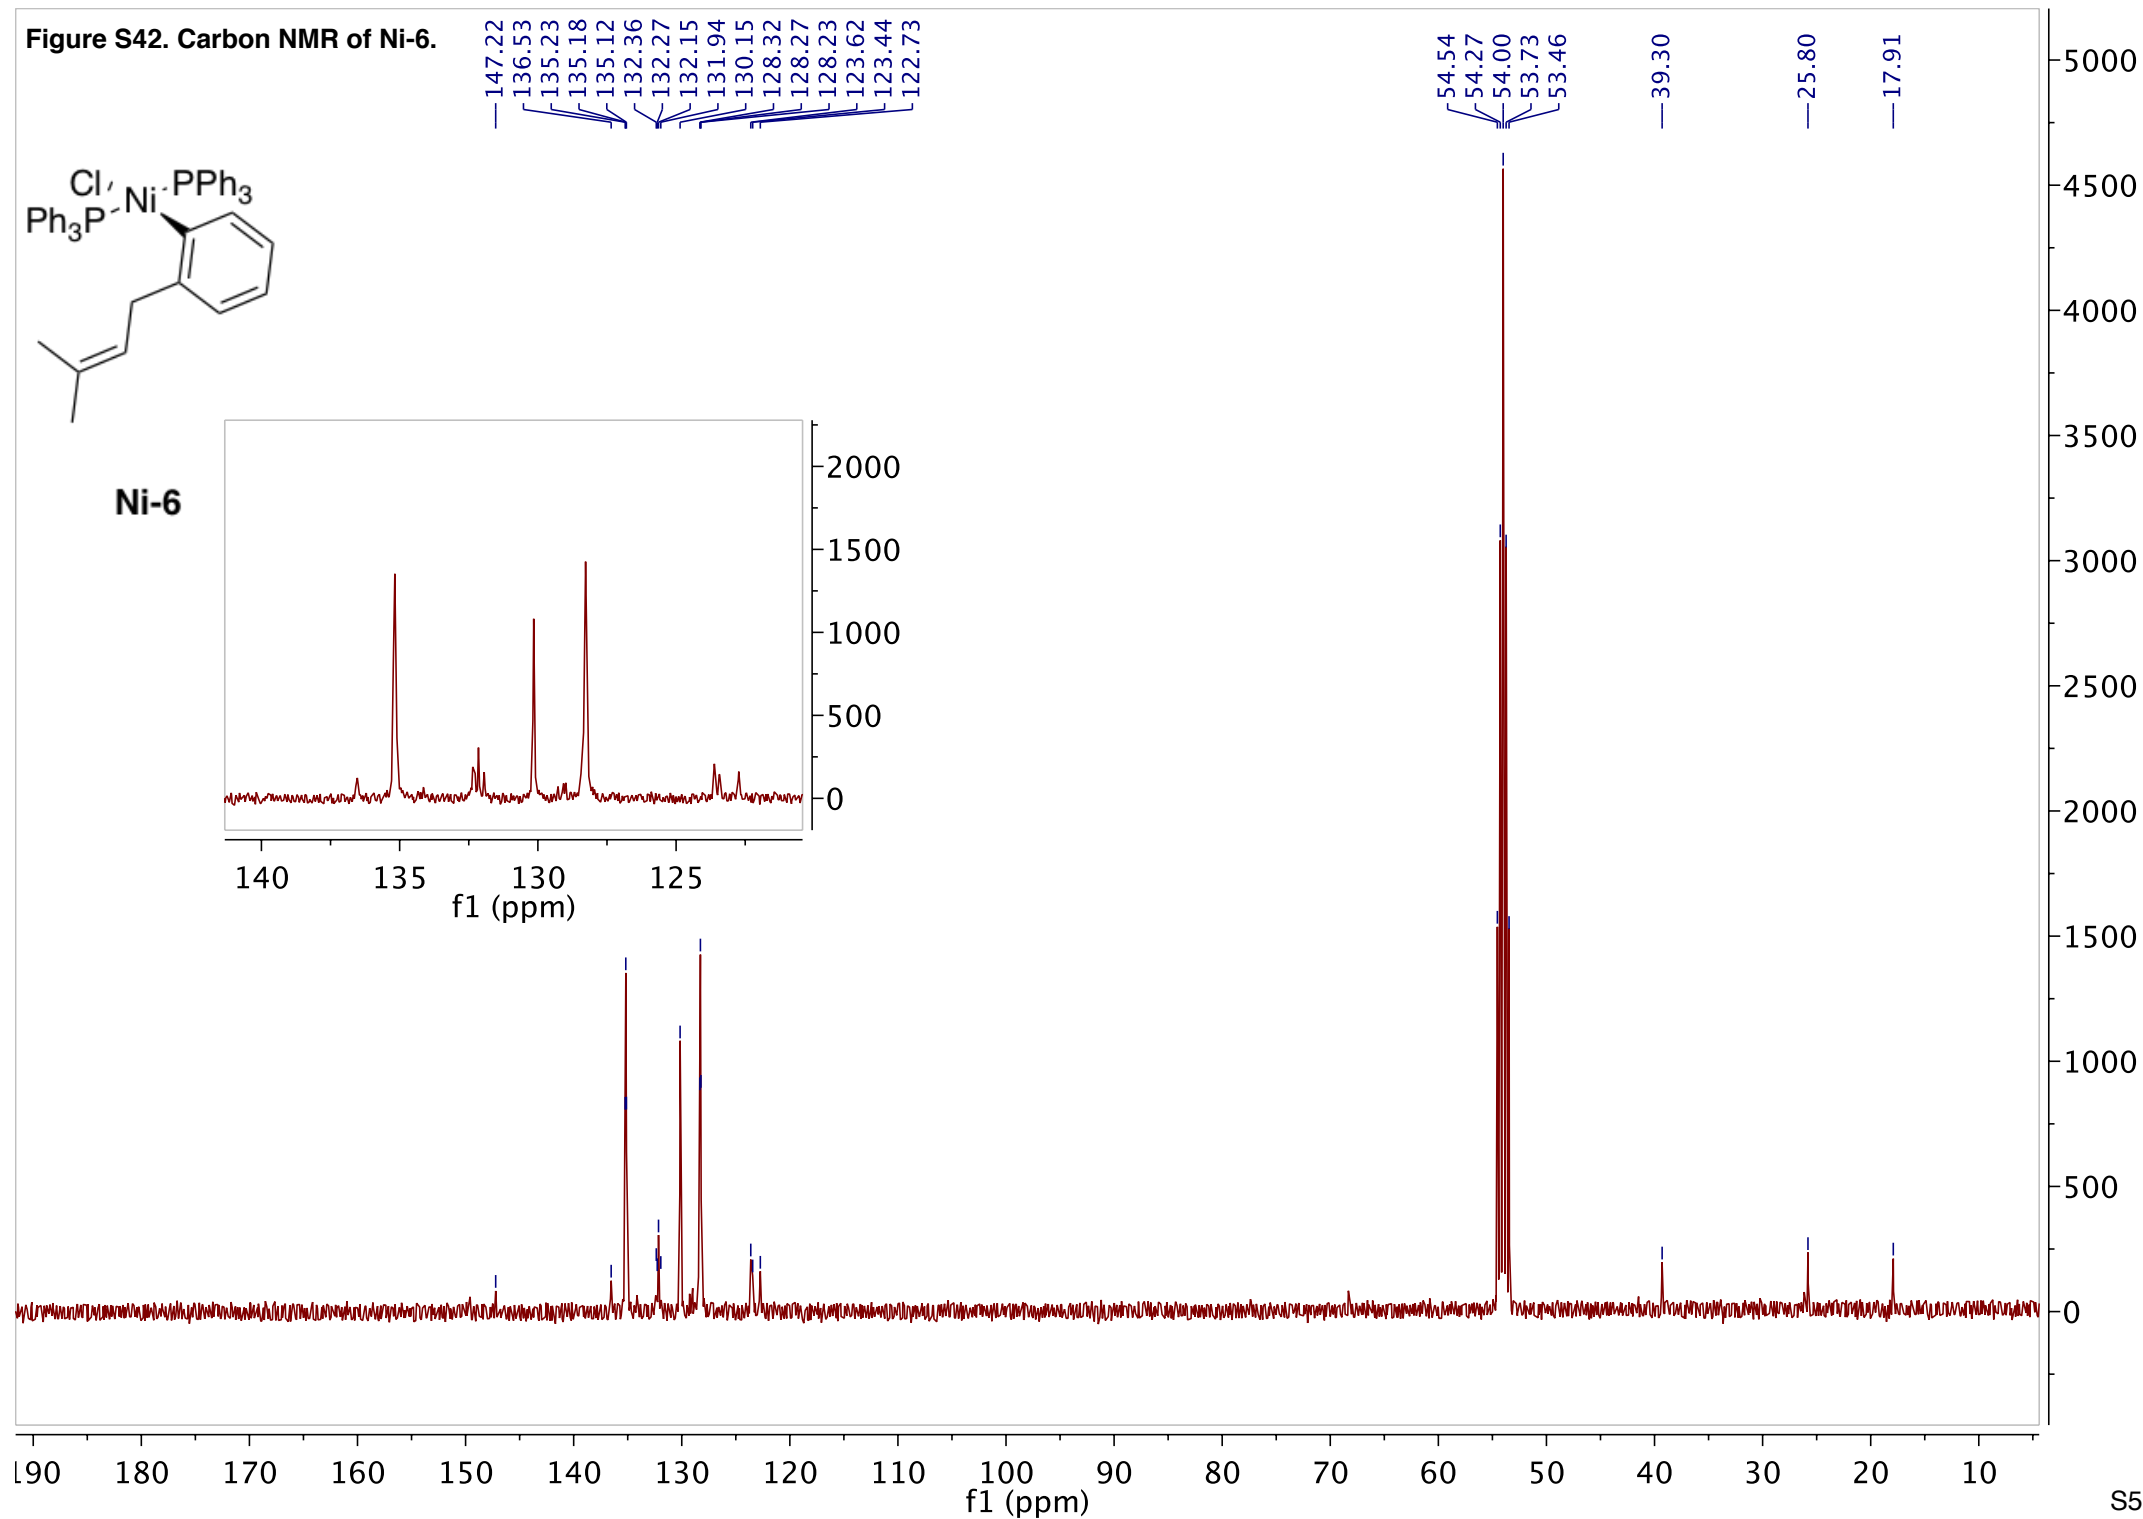

Figure S43. Phosphorus NMR of Ni-6.

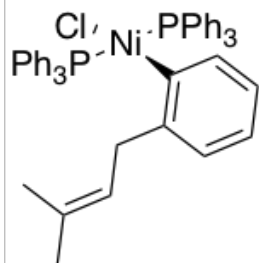

Ni-6

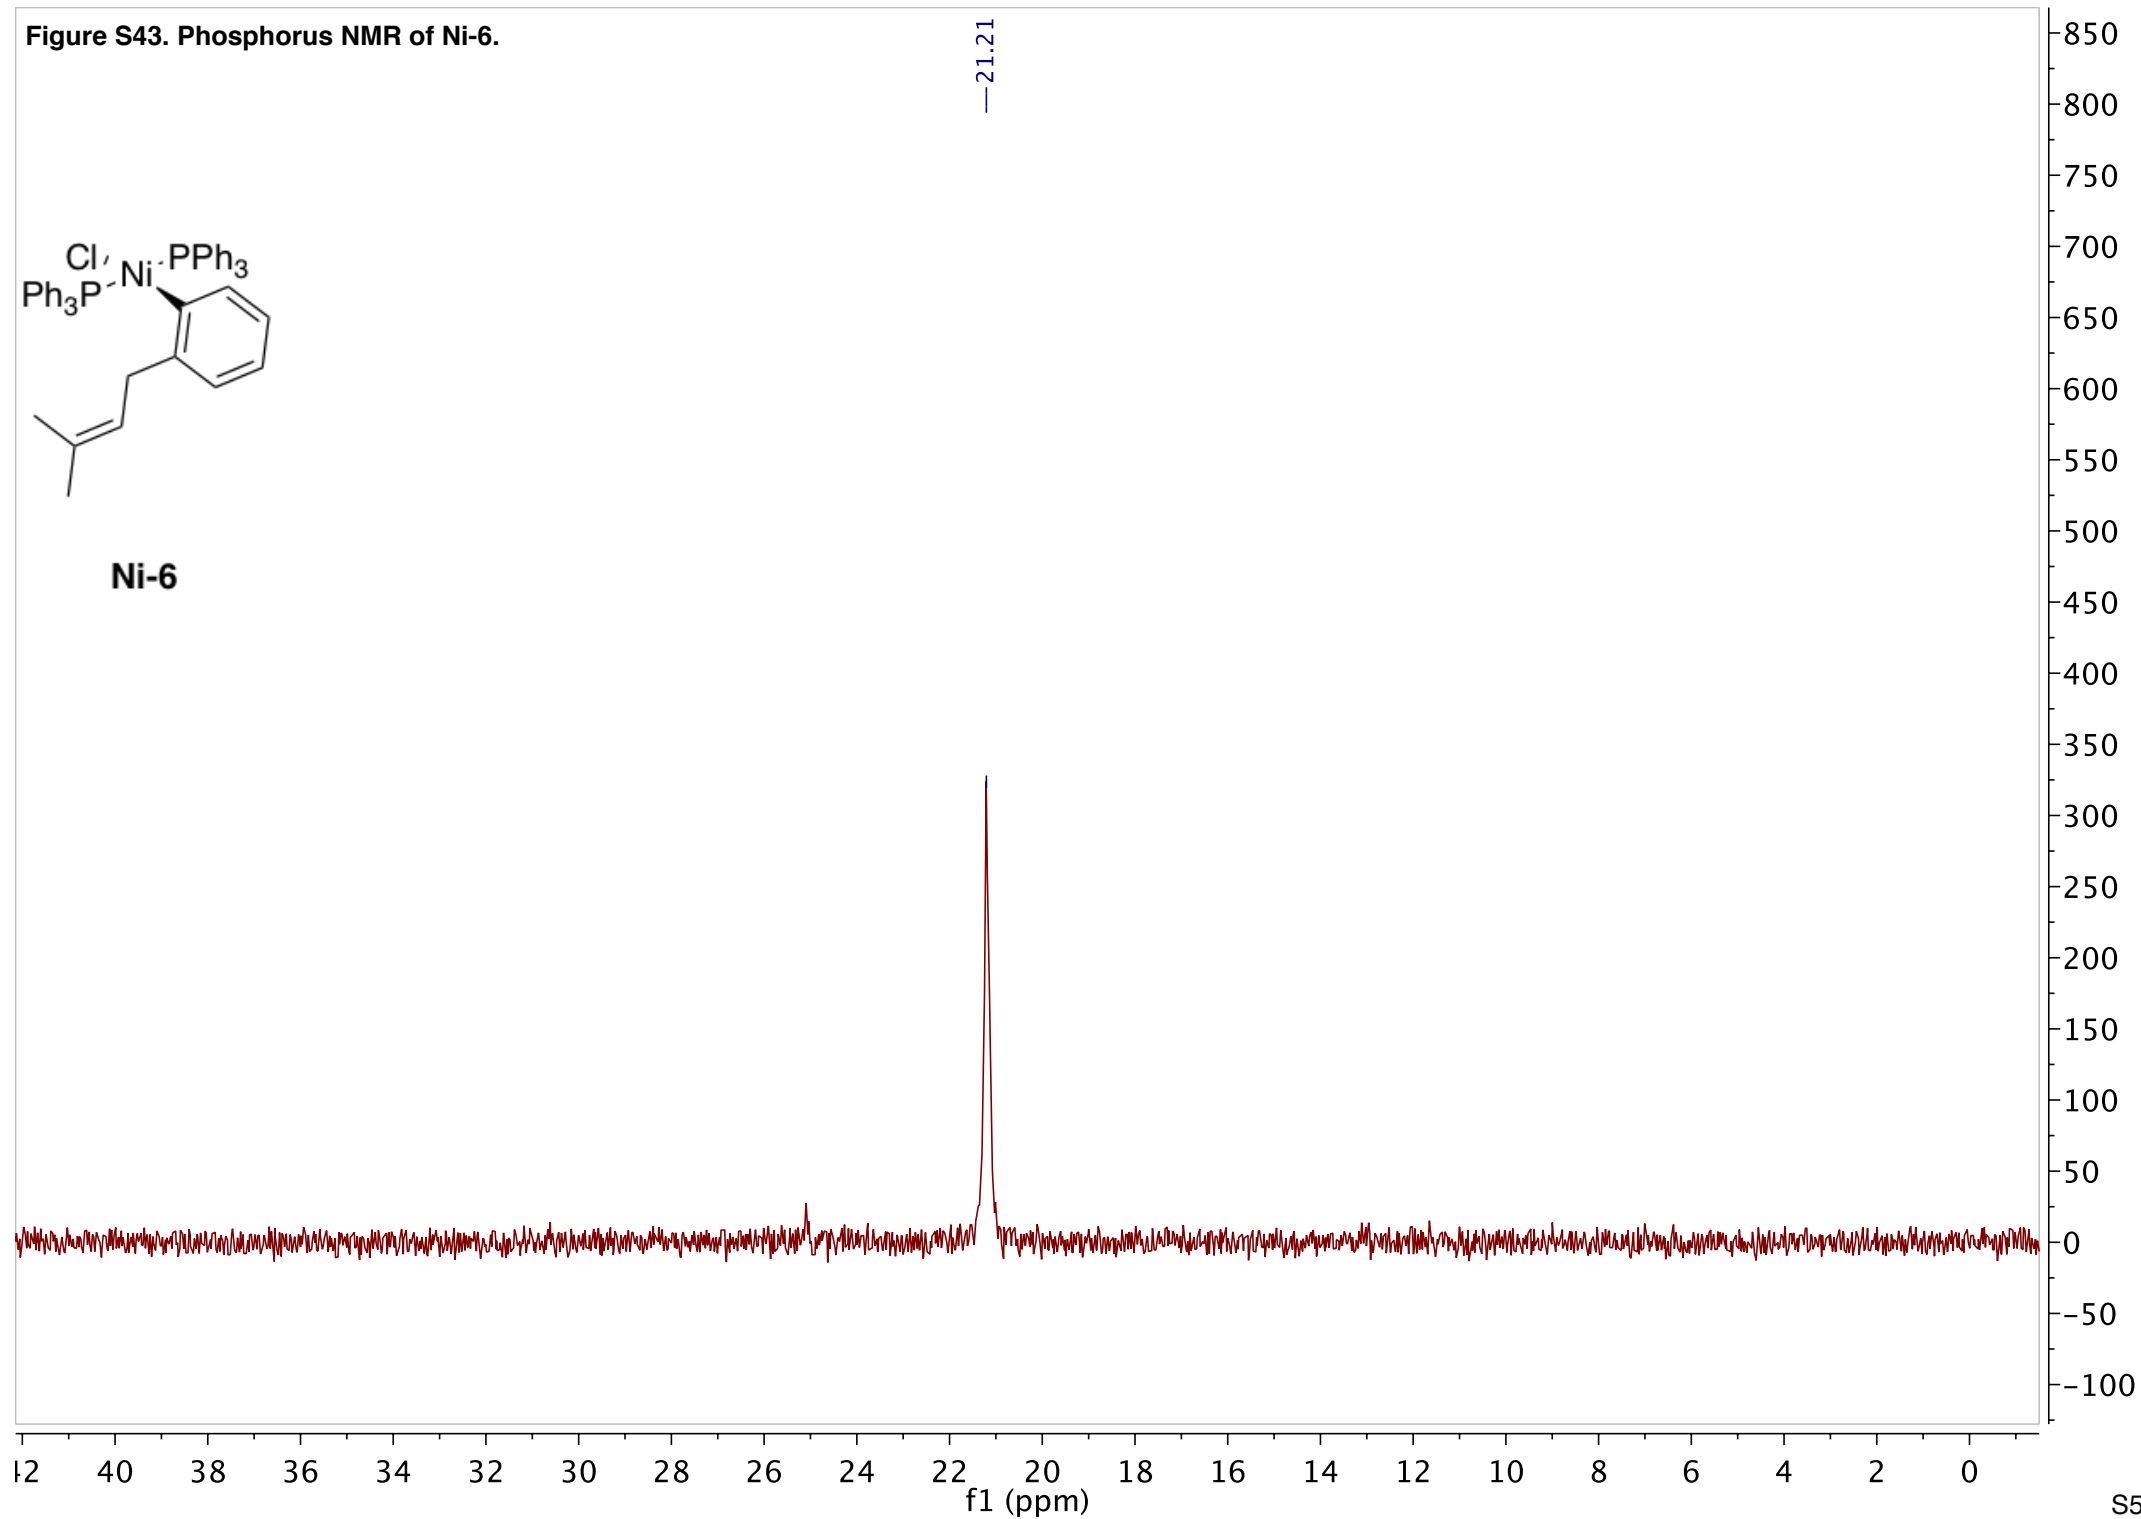

## VIII. References:

1. Ng, S-S.; Jamison, T. F. *J. Am. Chem. Soc.* **2005**, *127*, 14194–14195.
2. Tietze, L. F.; Lotz, F. *Eur. J. Org. Chem.* **2006**, 4676–4684.
3. Esguerra, K. V. N.; Fall, Y.; Petitjean, L.; L, J-P. *J. Am. Chem. Soc.* **2014**, *136*, 7662–7668.
4. Standley, E. A.; Smith, S. J.; Müller, P.; Jamison, T. F. *Organometallics* **2014**, *33*, 2012–2018.
5. Kurono N.; Honda E., Komatsu F.; Orito K.; Tokuda M. *Tetrahedron* **2004**, *60*, 1791–1802.; Wolstenhulme, J. R.; Rosenqvist, J.; Lozano, O.; Ilupeju, J.; Wurz, N.; Engle, K. M.; Pidgeon, G.W.; Moore, P.R. Sandford, G.; Gouverneur, V. *Angew. Chem. Int. Ed.* **2013**, *52*, 9796 –9800.
6. Tobisu, M.; Nakai, H.; Chatani, N. *J. Org. Chem.* **2009**, *74*, 5471–5475.
7. Sheldrick, G. M. *Acta Cryst.* **1990**, A46, 467–473.
8. Sheldrick, G. M. *Acta Cryst.* **2008**, A64, 112–122.
9. Müller, P. *Crystallogr. Rev.* **2009**, *15*, 57–83.
